# Supplementary material for: Rehabilitation interventions to improve patient-reported outcomes and physical fitness in survivors of muscle invasive bladder cancer: a systematic review protocol
Source: PubMed Central journal article supplement — BMJ Open. 2017 Jun 6;7(5):e016054. doi: 10.1136/bmjopen-2017-016054 (PMC5726122; doi:10.1136/bmjopen-2017-016054), 2017-06-06
Supplement: bmjopen-2017-016054.draft_revisions.pdf [file bmjopen-2017-016054.draft_revisions.pdf]

# BMJ Open

## Rehabilitation interventions to improve patient reported outcomes and physical fitness in survivors of muscle invasive bladder cancer: a systematic review protocol

|                                 |                                                                                                                                                                                                                                                                                                                                                                                                                                                                                                                                                                                                                                                                                                                                                                                                                                                                                            |
|---------------------------------|--------------------------------------------------------------------------------------------------------------------------------------------------------------------------------------------------------------------------------------------------------------------------------------------------------------------------------------------------------------------------------------------------------------------------------------------------------------------------------------------------------------------------------------------------------------------------------------------------------------------------------------------------------------------------------------------------------------------------------------------------------------------------------------------------------------------------------------------------------------------------------------------|
| Journal:                        | <i>BMJ Open</i>                                                                                                                                                                                                                                                                                                                                                                                                                                                                                                                                                                                                                                                                                                                                                                                                                                                                            |
| Manuscript ID                   | bmjopen-2017-016054                                                                                                                                                                                                                                                                                                                                                                                                                                                                                                                                                                                                                                                                                                                                                                                                                                                                        |
| Article Type:                   | Protocol                                                                                                                                                                                                                                                                                                                                                                                                                                                                                                                                                                                                                                                                                                                                                                                                                                                                                   |
| Date Submitted by the Author:   | 20-Jan-2017                                                                                                                                                                                                                                                                                                                                                                                                                                                                                                                                                                                                                                                                                                                                                                                                                                                                                |
| Complete List of Authors:       | Rammant, Elke; Universitair Ziekenhuis Gent, Department of Radiation Oncology and Experimental Cancer Research<br>Bultijnck, Renée; Universitair Ziekenhuis Gent, Department of Radiation Oncology and Experimental Cancer Research<br>Sundahl, Nora; Universitair Ziekenhuis Gent, Department of Radiation Oncology and Experimental Cancer Research<br>Ost, Piet; Universitair Ziekenhuis Gent, Department of Radiation Oncology and Experimental Cancer Research<br>Pauwels, Nele; Universitair Ziekenhuis Gent, Knowledge Center Ghent<br>Deforche, Benedicte; Universiteit Gent, Department of Public Health<br>Pieters, Ronny; Universitair Ziekenhuis Gent, Department of Urology<br>Decaestecker, Karel; Universitair Ziekenhuis Gent, Department of Urology<br>Fonteyne, Valérie; Universitair Ziekenhuis Gent, Department of Radiation Oncology and Experimental Cancer Research |
| <b>Primary Subject Heading</b>: | Urology                                                                                                                                                                                                                                                                                                                                                                                                                                                                                                                                                                                                                                                                                                                                                                                                                                                                                    |
| Secondary Subject Heading:      | Evidence based practice, Oncology, Rehabilitation medicine                                                                                                                                                                                                                                                                                                                                                                                                                                                                                                                                                                                                                                                                                                                                                                                                                                 |
| Keywords:                       | Muscle invasive bladder cancer, Exercise, Psychosocial intervention, systematic review, Rehabilitation                                                                                                                                                                                                                                                                                                                                                                                                                                                                                                                                                                                                                                                                                                                                                                                     |
|                                 |                                                                                                                                                                                                                                                                                                                                                                                                                                                                                                                                                                                                                                                                                                                                                                                                                                                                                            |

SCHOLARONE™  
Manuscripts

1  
2  
3 **Rehabilitation interventions to improve patient reported outcomes and**  
4 **physical fitness in survivors of muscle invasive bladder cancer: a systematic**  
5 **review protocol**  
6  
7

8 Elke Rammant<sup>1</sup>, Renée Bultijnck<sup>1</sup>, Nora Sundahl<sup>1</sup>, Piet Ost<sup>1</sup>, Nele S. Pauwels<sup>2</sup>, Benedicte  
9 Deforche<sup>3</sup>, Ronny Pieters<sup>4</sup>, Karel Decaestecker<sup>4</sup>, Valérie Fonteyne<sup>1</sup>  
10  
11

12  
13  
14 **Affiliations:**

- 15  
16 1. Department of Radiation Oncology and Experimental Cancer Research, Ghent  
17 University Hospital, Ghent, Belgium  
18 2. Knowledge Center Ghent, Ghent University Hospital, Ghent, Belgium  
19 3. Department of Public Health, Ghent University, Ghent, Belgium  
20 4. Department of Urology, Ghent University Hospital, Ghent, Belgium  
21  
22  
23  
24

25 **Corresponding Author:**

26  
27  
28 Elke Rammant, MSc.  
29 Department of Radiation Oncology and Experimental Cancer Research,  
30 Ghent University Hospital  
31 De Pintelaan 185, B-9000 Ghent, Belgium  
32 Tel: +32 9 33 21552  
33 E-mail: [elke.rammant@ugent.be](mailto:elke.rammant@ugent.be)  
34  
35  
36

37 **Word count excluding title page, abstract, references, figures and tables: 2988**  
38  
39  
40  
41  
42  
43  
44  
45  
46  
47  
48  
49  
50  
51  
52  
53  
54  
55  
56  
57  
58  
59  
60

## ABSTRACT

### Introduction

Survivors of muscle invasive bladder cancer (MIBC) experience physical and psychosocial side effects of cancer diagnosis and treatment. These negative side effects have a crucial impact on the quality of life (QoL). To date, there is evidence that rehabilitation interventions such as physical activity and psychosocial support have a positive effect on the QoL of cancer survivors. Unfortunately, there are no specific guidelines for rehabilitation or survivorship programs for MIBC survivors. Therefore, this systematic review aims to assess the effects of exercise-based and psychosocial rehabilitation interventions for MIBC survivors.

### Methods and analysis

The approach of this review is consistent with the Cochrane methodology. Randomized controlled trials and non-randomized studies will be included. The population of interest is patients ( $\geq 18$  years of age) with diagnosis of MIBC and there will be two eligible intervention types for inclusion: exercise-based and psychosocial rehabilitation interventions. The primary outcome measures are patient reported outcomes (e.g. QoL, fatigue, pain) and physical fitness. Studies will be identified independently by two review authors by searching the Cochrane Central Register of Controlled Trials, MEDLINE, Embase, Web of Science and the Physiotherapy Evidence Database. A third reviewer will be asked by disagreements. Risk of bias will be assessed using the Cochrane Collaboration's tools. Data will be summarized descriptively. If homogeneity of the studies is sufficient, meta-analysis will be undertaken.

### Discussion

This systematic review is expected to provide guidance to development of evidence-based rehabilitation or survivorship programs for MIBC survivors. The broad scope of this review (i.e. different interventions and study designs) is needed to have a comprehensive view on effective rehabilitation interventions.

### Ethics and dissemination

Ethics approval is not required, as no primary data will be collected. Results will be disseminated through a peer-reviewed publication.

**PROSPERO registration number:** CRD42017055306

### Keywords

Bladder neoplasm— exercise – psychosocial intervention – rehabilitation

## Strengths and limitations of this study

### Strengths

- The overall approach of this review is consistent with the methodology described in the Cochrane Handbook for Systematic reviews of Interventions
- It's an innovative topic in the field of bladder cancer.
- Actual problem because the incidence of bladder cancer is rising.

### Limitations

- Possible paucity of studies meeting the inclusion criteria.

## BACKGROUND

### Description of the condition

Bladder cancer (BC) is the 11<sup>th</sup> most common cancer worldwide. When both genders are considered separately, BC in men is rising to the 7<sup>th</sup> place whilst BC in women is dropping to the 17<sup>th</sup> place of most common cancer worldwide<sup>1,2</sup>. Worldwide, the age-standardized incidence rate (per 100,000 person/years) is 9.0 for men and 2.2 for women. In 2012, the age-standardized mortality rate (per 100,000 person/years) was 3.2 for men and 0.9 for women<sup>3</sup>. Besides the fact that BC is more common in men than in women, BC is also known as a disease of the elderly. Due to the growth of an aging population, it is expected that BC will become an enormous challenge in the near future<sup>4,5</sup>.

Thirty percent of the patients diagnosed with BC present with muscle invasive BC (MIBC, stages T2, T3, and T4)<sup>6</sup>. Also, depending on risk stratification, up to 45% of patients with non MIBC will progress to MIBC<sup>7</sup>. The standard treatment in patients with MIBC is neo-adjuvant chemotherapy followed by radical cystectomy (bladder removal), extended pelvic lymph node dissection and urinary diversion (continent or incontinent bladder replacement)<sup>1</sup>. These are major interventions associated with a variety of negative side effects, especially on the urinary and sexual function<sup>8</sup>. This can lead to a loss of quality of life (QoL), which refers to overall wellbeing and happiness, and encompasses physical, functional, psychological and social aspects<sup>9</sup>. Combined radiochemotherapy is an alternative for radical cystectomy in order to preserve the bladder. Both radiotherapy and chemotherapy can also be used in the adjuvant or palliative setting and can also cause a variety of treatment related side effects. Therefore, follow-up care beyond the acute diagnosis and treatment phase is necessary<sup>10</sup>.

### Description of the intervention

“Cancer rehabilitation is a concept that is defined by the patient and involves helping a person with cancer to obtain maximum physical, social, psychological, and vocational functioning within the limit by the disease and its treatment”<sup>11</sup>. Therefore, a rehabilitation or survivorship program for cancer patients needs to comprise different intervention approaches<sup>12,13</sup>.

Physical activity (PA) is seen as one of the rehabilitation interventions to improve patients QoL and survival outcomes. PA is defined as “any movement created by the skeletal muscles that causes a substantial increase in energy expenditure”<sup>9</sup>. It is important that the terms ‘physical activity’ and ‘exercise’ are not mixed with each other. PA can be seen as an overarching term that includes exercise as well as other activities which involve bodily movement and are done as part of playing, working, active transportation, house chores and recreational activities. Exercise on the other hand, is a subcategory of PA. It is planned, structured, repetitive, and purposeful to improve or maintain one or more components of

1  
2  
3 physical fitness (cardiorespiratory fitness, muscular strength, muscular endurance, flexibility  
4 and body composition)<sup>14</sup>. These components represent important outcomes in cancer  
5 survivors that may mediate the influence of exercise on other outcomes<sup>9</sup>.

6  
7 Psychosocial interventions are another important focus in rehabilitation. These sort of  
8 interventions aim to help patients cope with negative side effects of cancer diagnosis and  
9 treatment<sup>15</sup>. Based on a framework proposed by Cunningham, there are five categories of  
10 interventions: patient education, social support, coping skills training, psychotherapy and  
11 spiritual/existential therapy<sup>16</sup>.

### 12 13 14 15 **How the intervention might work**

16  
17 Rehabilitation in BC patients can be complicated due to the synergistic interaction of two  
18 factors. Firstly, cancer treatments can lead to harmful consequences and side effects.  
19 Secondly, the older age of BC patients can lead to an aging process associated with  
20 functional and psychosocial declines. Thus, the first factor may stimulate the aging process  
21 resulting in amplified physical and psychosocial constraints and subsequent disability, if not  
22 remedied through intervention. Therefore, interventions to improve physiologic and  
23 psychosocial limitations are of significance to the longevity of cancer survivors<sup>17</sup>.

24  
25  
26 Rehabilitation interventions have been investigated in other cancer diseases and have been  
27 proven to be effective. Exercise can lead to better managing of patients physiologic  
28 symptoms, improve a variety of mental health outcomes including fatigue, anxiety, QoL and  
29 mood and possibly even better survival outcomes<sup>17 18</sup>. Research into effectiveness of  
30 psychosocial interventions in cancer patients is scarce. Nonetheless, there is evidence that  
31 psychosocial interventions can improve patients' QoL<sup>19</sup>.

32  
33  
34  
35 Rehabilitation interventions can be categorized as a tertiary prevention approach. Tertiary  
36 prevention aims to prevent and manage cancer-related and treatment-induced side effects.  
37 Additionally, tertiary prevention provide a knowledge basis for optimal follow-up care and  
38 cancer surveillance, and optimize health after cancer treatment<sup>10</sup>.

### 39 40 41 **Why it is important to do this review**

42  
43 With an increasing number of cancer survivors, tertiary prevention will become imperative in  
44 cancer survivorship. In order to develop evidence-based rehabilitation programs for patients  
45 with MIBC, it is essential to have a global picture of effective rehabilitation interventions.  
46 Therefore, a systematic review assessing the effects of exercise-based and psychosocial  
47 rehabilitation interventions for BC patients is needed. A previous systematic review assessed  
48 the effects of lifestyle factors (diet, smoking and physical activity) on health-related quality  
49 of life in bladder cancer survivors. Findings of this review concluded that there was limited  
50 evidence to support a positive association between health-related quality of life and physical  
51 activity in bladder cancer survivors<sup>20</sup>. Our review differs with previous review in several  
52 aspects. First we want to identify well defined supervised interventions that are effective. In  
53  
54  
55  
56  
57  
58  
59  
60

1  
2  
3 previous review, they evaluated the physical activity pattern of the patient, which is not the  
4 same as a supervised exercise intervention. Furthermore, this review will not only focus on  
5 health-related quality of life, we will also assess the effects of rehabilitation interventions on  
6 other outcomes (explained below). Additionally, to our knowledge, there is no systematic  
7 review that has summarized the evidence of psychosocial rehabilitation interventions for  
8 MIBC survivors in a systematic manner.  
9  
10

11 No specific guidelines exist for exercise-based and/or psychosocial rehabilitation  
12 interventions for MIBC survivors. This review could give guidance to the development of  
13 specific evidence-based guidelines. Although this review focuses only on the exercise and  
14 psychosocial part of rehabilitation, it is important to note that rehabilitation of cancer  
15 patients requires also other interventions such as diet counseling, smoking cessation, etc.<sup>12</sup>.  
16  
17  
18

## 19 AIMS AND OBJECTIVES

### 21 Primary objective

22  
23 To assess the effects of rehabilitation interventions (exercise-based and psychosocial  
24 interventions) on patient reported outcomes (e.g. QoL, fatigue, pain) and physical fitness of  
25 MIBC survivors.  
26  
27

### 28 Secondary objectives

29  
30 To identify significant demographic, clinical, personal, or intervention related moderators of  
31 intervention effects.  
32  
33

## 34 METHODS

35  
36 The overall approach of this review is consistent with the methodology described in the  
37 Cochrane Handbook for Systematic reviews of Interventions<sup>21</sup> and is described below.  
38 Reports of current systematic review protocol adhere to the preferred items for systematic  
39 reviews and meta-analysis protocol (PRISMA-P) checklist<sup>22</sup>. The systematic review itself will  
40 adhere to the Preferred Reporting Items for Systematic Reviews and Meta-Analyses  
41 (PRISMA)<sup>23</sup>.  
42  
43  
44

### 45 Criteria for considering studies for this review

#### 47 Types of studies

48  
49 Because of the anticipated low amount of randomized controlled trials (RCTs), RCTs and non-  
50 randomized studies (NRS) (i.e., cohort studies, case-control studies, cross-sectional studies  
51 and quasi-randomized controlled clinical trials (CCTs)) will be considered as appropriate  
52 study designs. Results from RCTs and NRS will be presented separately.  
53  
54  
55  
56  
57  
58  
59  
60

## Types of participants

The population of interest will be adults ( $\geq 18$  years of age) with medically confirmed diagnosis of localized MIBC or high risk non-muscle invasive bladder cancer (NMIBC) for whom a radical cystectomy is indicated. Patients with metastasized BC will be excluded. Demographic factors are no exclusion criteria except for age ( $< 18$  years of age). Studies involving participants with a range of cancers or other diagnoses that report results specifically for patients with MIBC will be included. Studies involving participants with urologic cancers where data is not provided separately for MIBC patients will be excluded.

## Types of interventions

Exercise-based rehabilitation interventions considered for this review will be aerobic or endurance activities, strength or resistance training, balance exercises, flexibility exercises (with inclusion of yoga and Pilates), exercises specific to address sexual functioning and pelvic floor exercises in case of bladder preserving strategies or bladder reconstruction after radical cystectomy. Generalized advice to engage in regular PA activity will not be considered as an exercise-based rehabilitation intervention. In this review, the focus will be placed on exercise in a planned, structured, repetitive and purposeful rehabilitation intervention. PA as part of playing, working, active transportation, house chores or recreational activities will not be included.

Psychosocial rehabilitation interventions eligible for inclusion will be based on the framework proposed by Cunningham: patient education (e.g. stoma management, generalized advice to engage in PA activity), social support, coping skills training, psychotherapy and spiritual/existential therapy<sup>16</sup>. Alternative medicine and therapies will not be included in this review.

Both intervention types have to be supervised by a professional, can either be individual or in group, hospital-based or home-based (with follow up by a professional), and can be given before, during and/or after treatment. No limits will be placed on the timing, frequency, intensity and duration of rehabilitation interventions. The interventions will be compared with an inactive control intervention (e.g. no treatment, standard care or a waiting list control).

## Types of outcome measures

For both primary and secondary outcome measures, there will be no exclusion based on length of follow up.

### *Primary outcomes*

1. Patient reported outcomes (PROs) including overall quality of life, specific quality of life domains including symptoms such as fatigue, pain, urinary incontinence, sexual dysfunction, gastro-intestinal dysfunction and psychological factors such as anxiety, depression, stress



and self-esteem. Due to the wide range of questionnaires used for PROs and the non-consensus of using one standardized questionnaire, only studies using the standardized and validated measurement instruments for PRO, found in Table 1<sup>24 36</sup> will be included. All studies using other measurement instruments will be excluded, unless proof of their validation can be found in literature.

2. Physical fitness assessed by VO<sub>2</sub> peak, VO<sub>2</sub> max, 6- or 12-minute walk test, 400-m walk test, handgrip strength tests, sit and reach tests or other proven to be validated instruments.

### *Secondary outcomes*

1. Cancer recurrence, cancer-specific survival, progression-free survival, overall survival, mortality, years of life lost or 5-year survival.

2. Body composition assessed by height, weight, body mass index, fat mass, lean body mass, thickness of skin folds, body fat, arm circumference, waist circumference, hip circumference or waist-hip ratio.

3. Bone mineral density or fracture risk assessed by fracture risk assessment tool (FRAX)<sup>37</sup>.

4. Karnofsky performance score (KPS)<sup>38</sup>.

**Table 1 – standardized and validated measurement instruments for the included PROs**

| <b>Patient reported outcome</b>    | <b>Validated measurement instrument</b>                                                                                                                                                                                       |
|------------------------------------|-------------------------------------------------------------------------------------------------------------------------------------------------------------------------------------------------------------------------------|
| <b>HRQOL</b>                       | EQ-5D visual analogue scale, MID: 7 points, SF-36, Ferrans and Powers Quality of Life Index, World Health Organization Quality of Life, SF-12, Padilla QLI, 20-item short form health survey and Satisfaction With Life Scale |
| <b>Cancer specific QOL</b>         | FACT-G, EORTC QLQ-C30, Functional Living Index-Cancer, Selby's QLI, Cleary's QLI and Cancer Rehabilitation Evaluation System –SF                                                                                              |
| <b>Bladder cancer specific QOL</b> | QLQ-BLM30, BCI and FACT-BI                                                                                                                                                                                                    |
| <b>Sexual function</b>             | IIEF-5 and FSFI                                                                                                                                                                                                               |
| <b>Gastro-intestinal function</b>  | GIQLI                                                                                                                                                                                                                         |
| <b>Urinary incontinence</b>        | BCI supplement, ICIQ-UI SF, IPSS                                                                                                                                                                                              |
| <b>Psychological factors</b>       |                                                                                                                                                                                                                               |
| <b>Depression</b>                  | BSI-18, BDI,ISR-depression scale                                                                                                                                                                                              |
| <b>Anxiety</b>                     | STAI anxiety scales, numeric rating scales or visual analogue scale                                                                                                                                                           |
| <b>Stress</b>                      | Perceived Stress Scale                                                                                                                                                                                                        |
| <b>Self-esteem</b>                 | Rosenberg self-esteem scale                                                                                                                                                                                                   |

## Search methods for identification of studies

### Electronic searches

The following electronic databases will be searched from inception until the search date: the Cochrane Central Register of Controlled Trials (CENTRAL), MEDLINE (using the PubMed interface), Embase (using the embase.com interface), Web of Science and the Physiotherapy Evidence Database (PEDro). The search strategies will be evaluated using the PRESS checklist<sup>39</sup> and will be monitored and peer reviewed by an information specialist (NSP). The search strategies are presented in 'Supplementary File 1'.

### Searching other resources

The cited and citing references of the included studies will be checked via Web of Science.

## Data collection and analysis

### Selection of studies

All references found through the search process will be downloaded in a database created by reference management software (Endnote). After removing duplicates in Endnote, all references will be imported into Covidence for screening purposes. Obviously irrelevant studies, based on title and abstract, will independently be excluded by two review authors (ER and VF). After screening titles and abstracts, two review authors (ER and VF) will independently assess full-text reports for eligibility. Discrepancies will be discussed with a third review author (NS). Reasons for exclusion of full-texts will be documented. Studies will be excluded if no full-text is available. Abstracts in any other language than English will be excluded. There will be no language restriction for full texts and translations will be carried out if necessary. If studies have multiple publications with the same outcome(s) reported, manuscripts with the longest follow-up will be selected for inclusion. Older publications referred to in included articles will be accessed to clarify methods if required.

### Data extraction

A modified EPOC data collection form of the Cochrane collaboration will be used and pilot tested with at least three studies in the review<sup>40</sup>. After pilot testing the form, adjustments can be made. Data extraction will be performed independently by two review authors (ER and VF). Following data will be extracted for each study:

- **General information:** date form completed, name of person extracting data, report title, report ID, authors' names, source, country, contact address, language of publication, year of publication.
- **Population and setting:** population description (from which study participants are drawn), setting (e.g. inpatient, outpatient, hospital setting, home setting,

1  
2  
3 combination), inclusion and exclusion criteria and sampling method (e.g.,  
4 convenience, random).

- 5 • **Methods:** aim of study, design, unit of allocation, start and end date, duration of  
6 participation.
- 7  
8 • **Participants:** number of participants in intervention and control groups, details of  
9 clusters if applicable, baseline imbalances, participant demographics such as sex, age  
10 and ethnicity, disease related characteristics such as stage of disease, received  
11 treatment(s), time after diagnosis and comorbidities.
- 12  
13 • **Intervention:** type of intervention (exercise-based, psychosocial or combination),  
14 details of intervention type (e.g. aerobic, pelvic floor exercises, counseling, patient  
15 education), co-intervention(s), type of control intervention, frequency, duration,  
16 intensity and providers of the intervention.
- 17  
18 • **Outcomes:** outcome name, time points measured and reported, outcome definition,  
19 person measuring/reporting, upper and lower limits of scales, unit measurement if  
20 relevant, if outcome/tool is validated, imputation of missing data and assumed risk  
21 estimate.
- 22  
23 • **Results:** outcome, measurement effects (please see data analyses below) for  
24 intervention and comparison group, baseline data, number of missing participants  
25 and reasons, statistical methods used.  
26  
27  
28

## 29 Assessment of risk of bias in included studies

30  
31 The Cochrane Collaboration's tool for assessing risk of bias will be used for RCTs. Assessment  
32 of risk of bias in NRS will be done using the Newcastle-Ottawa Scale for observational  
33 studies. Assessment of risk of bias of individual studies as well as the overall quality of the  
34 body of evidence will be evaluated with these two tools (which correspond to the GRADE  
35 approach). A summary assessment of risk of bias will be done for each outcome 'within' a  
36 study and for each outcome 'across' studies of the same study design. This will be  
37 summarized in the 'Summary of findings table'. Given the nature of exercise and  
38 psychosocial interventions, it is impossible to blind participants and personnel for this  
39 interventions. Therefore, 'blinding of participants and personnel' will not be taken into  
40 account in the risk of bias assessment, but this will be taken into consideration in the  
41 discussion section.  
42  
43  
44  
45

## 46 Dealing with missing data

47  
48 If the data required are not available in the publication, we will first attempt to contact the  
49 study authors. If this is not possible, we will try to back-calculate from the data presented. If  
50 data will be obtained from other study authors, this will be reported in the review in a  
51 transparent manner. This way, we can keep in mind that this missing data obtained from  
52 study authors was not peer reviewed. Studies assessing lifestyle interventions may have  
53  
54  
55  
56  
57  
58  
59  
60

1  
2  
3 issues with compliance. Therefore, reasons for missing data (e.g. dropouts, losses to follow-  
4 up and withdrawals) will be carefully reported.  
5

### 6 Assessment of heterogeneity 7

8 Heterogeneity will be assessed for each different study design type. Statistical heterogeneity  
9 will be quantified using the  $I^2$  statistic. We will consider the statistical heterogeneity to be  
10 high if  $I^2 > 50\%$ . Depending on the heterogeneity of the studies and their results, we will  
11 decide if a meta-analysis can be conducted. We will attempt to explain any observed  
12 heterogeneity in the review.  
13  
14

### 15 Assessment of reporting bias 16

17  
18 Funnel plots will be used to assess publication bias when ten or more studies are included in  
19 a meta-analysis.  
20

### 21 Data synthesis 22

23 The findings from the included studies will be summarized descriptively. For dichotomous  
24 outcomes, measurement of treatment effect will be reported as risk ratios (RRs) and 95 %  
25 confidence intervals (CIs). For continuous outcomes, we will calculate mean differences and  
26 95 % CIs when results are reported on the same scale (or can be converted to the same  
27 scale) or standardized mean differences and 95 % CIs if results are reported on different  
28 scales.  
29  
30

31  
32 There will be a moderator analysis to identify the most effective timing, frequency and  
33 duration of the rehabilitation interventions. There will also be an attempt to identify  
34 significant demographical or clinical moderators. To prevent co-intervention bias, there will  
35 be a subgroup analysis based on the type of intervention (only exercised-based  
36 interventions, only psychosocial interventions or a combination).  
37  
38

39  
40 When homogeneity of the studies is sufficient, random-effects meta-analysis will be  
41 undertaken separately for each type of study design. Only studies with low risk of bias will be  
42 included in meta-analyses. Therefore, we will perform sensitivity analyses to investigate how  
43 conclusions might be affected if studies at high or unclear risk of bias were included.  
44  
45

### 46 Ethics and dissemination 47

48 Ethics approval is not required, as no primary data will be collected. Results will be  
49 disseminated through a peer-reviewed publication.  
50

### 51 Discussion 52

53 To date, there are no specific guidelines for exercise-based or psychosocial rehabilitation  
54 interventions for MIBC survivors. This systematic review is expected to provide guidance to  
55  
56  
57  
58  
59

1  
2  
3 the development of specific guidelines and evidence-based rehabilitation or survivorship  
4 programs for MIBC survivors.  
5

6 The scope of this review is broad (i.e., different rehabilitation interventions and study  
7 designs). Although this means that heterogeneity might be present between the studies,  
8 evaluation of different intervention approaches is needed to develop optimal rehabilitation  
9 or survivorship programs. Caution will be present in the interpretation of the results because  
10 of the fact that evidence from RCTs is higher than evidence from NRS. Therefore, the results  
11 derived from RCTs will be seen as the primary evidence. Results from NRS will be seen as  
12 additional evidence to support the results from RCTs.  
13  
14  
15

#### 16 **Authors' contribution**

17  
18 ER drafted the manuscript and developed the methods and analyses strategy. VF coordinated the process. NSP  
19 and NS aided in developing the search strategy. VF, PO and KD provided uro-oncology specific expertise. RB and  
20 BD gave valuable input concerning rehabilitation.  
21

#### 22 **Funding statement**

23  
24 This study is funded by a grant of *Kom op tegen Kanker*. The granting bodies are not involved in data collection  
25 or analysis.  
26

#### 27 **Competing interests statement**

28  
29 None declared.  
30  
31  
32  
33  
34  
35  
36  
37  
38  
39  
40  
41  
42  
43  
44  
45  
46  
47  
48  
49  
50  
51  
52  
53  
54  
55  
56  
57  
58  
59  
60

## REFERENCES

1. Witjes JA, Compérat E, Cowan NC, et al. EAU Guidelines 2016: Muscle invasive and metastatic bladder cancer. Available from: <https://uroweb.org/guideline/bladder-cancer-muscle-invasive-and-metastatic/>, accessed on 12/10/2016.
2. Burger M, Catto JW, Dalbagni G, et al. Epidemiology and risk factors of urothelial bladder cancer. *European urology* 2013;**63**(2):234-41.
3. Ferlay J, Soerjomataram I, Ervik M, et al. Cancer Incidence and Mortality Worldwide: IARC CancerBase No. 11 [Internet]. Available from: <http://globocan.iarc.fr>, accessed on 15/10/2016 GLOBOCAN 2012 v1.0.
4. Malats N, Real FX. Epidemiology of bladder cancer. *Hematology/oncology clinics of North America* 2015;**29**(2):177-89, vii.
5. Shahrokh FS, Milowsky M, Droller MJ. Bladder cancer in the elderly. *Urologic Oncology: Seminars and Original Investigations* 2009;**27**(6):653-67.
6. Stenzl A, Witjes J, Compérat E, et al. Bladder Cancer Muscle-invasive and Metastatic. UPDATE 2012.
7. van Rhijn BW, Burger M, Lotan Y, et al. Recurrence and progression of disease in non-muscle-invasive bladder cancer: from epidemiology to treatment strategy. *European urology* 2009;**56**(3):430-42.
8. Wright JL, Porter MP. Quality-of-life assessment in patients with bladder cancer. *Nature clinical practice Urology* 2007;**4**(3):147-54.
9. McGowan EL, Courneya KS. Exercise interventions in supportive oncology. 2011.
10. National Cancer Institute: division of cancer control & population sciences. Available from: <https://cancercontrol.cancer.gov/ocs/statistics/definitions.html>, accessed on 11/10/2016 2016.
11. Gudbergsson SB, Dahl AA, Loge JH, et al. What is covered by “cancer rehabilitation” in PubMed? A review of randomized controlled trials 1990–2011. *Journal of rehabilitation medicine* 2015;**47**(2):97-106.
12. Weis J, Giesler JM. Rehabilitation for cancer patients. *Psycho-Oncology* 2014:87-101.
13. Harrison JD, Young JM, Price MA, et al. What are the unmet supportive care needs of people with cancer? A systematic review. *Supportive Care in Cancer* 2009;**17**(8):1117-28.
14. World Health Organisation: Global Strategy On Diet, Physical Activity and Health. Available from: <http://www.who.int/dietphysicalactivity/pa/en/>, accessed on 11/10/2016.
15. Parahoo K, McDonough S, McCaughan E, et al. Psychosocial interventions for men with prostate cancer. *The Cochrane Library* 2013.
16. Buffart LM, Kalter J, Chinapaw MJ, et al. Predicting Optimal Cancer Rehabilitation and Supportive care (POLARIS): rationale and design for meta-analyses of individual patient data of randomized controlled trials that evaluate the effect of physical activity and psychosocial interventions on health-related quality of life in cancer survivors. *Systematic reviews* 2013;**2**(1):1.
17. Brown JC, Winters-Stone K, Lee A, et al. Cancer, physical activity, and exercise. *Comprehensive Physiology* 2012.
18. Courneya KS. Physical activity and cancer survivorship: a simple framework for a complex field. *Exercise and sport sciences reviews* 2014;**42**(3):102-09.
19. Guo Z, Tang H-y, Li H, et al. The benefits of psychosocial interventions for cancer patients undergoing radiotherapy. *Health and quality of life outcomes* 2013;**11**(1):1.
20. Gopalakrishna A, Longo TA, Fantony JJ, et al. Lifestyle factors and health-related quality of life in bladder cancer survivors: a systematic review. *Journal of Cancer Survivorship* 2016;**10**(5):874-82.

- 1
  - 2
  - 3
  - 4
  - 5
  - 6
  - 7
  - 8
  - 9
  - 10
  - 11
  - 12
  - 13
  - 14
  - 15
  - 16
  - 17
  - 18
  - 19
  - 20
  - 21
  - 22
  - 23
  - 24
  - 25
  - 26
  - 27
  - 28
  - 29
  - 30
  - 31
  - 32
  - 33
  - 34
  - 35
  - 36
  - 37
  - 38
  - 39
  - 40
  - 41
  - 42
  - 43
  - 44
  - 45
  - 46
  - 47
  - 48
  - 49
  - 50
  - 51
  - 52
  - 53
  - 54
  - 55
  - 56
  - 57
  - 58
  - 59
  - 60
21. Higgins JPT, (editors) GS. Cochrane Handbook for Systematic Reviews of Interventions Version 5.1.0 [updated March 2011]. The Cochrane Collaboration, 2011:Available from [www.handbook.cochrane.org](http://www.handbook.cochrane.org).
22. Shamseer L, Moher D, Clarke M, et al. Preferred reporting items for systematic review and meta-analysis protocols (PRISMA-P) 2015: elaboration and explanation. *Bmj* 2015;**349**:g7647.
23. Moher D, Liberati A, Tetzlaff J, et al. Preferred reporting items for systematic reviews and meta-analyses: the PRISMA statement. *Bmj* 2009;**339**:b2535.
24. Measuring health-related quality of life in men with prostate cancer: A systematic review of the most used questionnaires and their validity. *Urologic Oncology: Seminars and Original Investigations*; 2015. Elsevier.
25. Danna BJ, Metcalfe MJ, Wood EL, et al. Assessing Symptom Burden in Bladder Cancer: An Overview of Bladder Cancer Specific Health-Related Quality of Life Instruments. *Bladder Cancer* 2016;**2**(3):329-40.
26. Vodermaier A, Linden W, Siu C. Screening for emotional distress in cancer patients: a systematic review of assessment instruments. *Journal of the National Cancer Institute* 2009;**101**(21):1464-88.
27. Brandt WA, Loew T, von Heymann F, et al. How does the ICD-10 symptom rating (ISR) with four items assess depression compared to the BDI-II? A validation study. *Journal of affective disorders* 2015;**173**:143-45.
28. Hornblow A, Kidson M-A. The visual analogue scale for anxiety: a validation study. *Australian and New Zealand Journal of Psychiatry* 1976;**10**(4):339-41.
29. Araujo IB, Castelani A, Soler T, et al. Stress assessment in the elderly by the Perceived Stress Scale (PSS). *INTERNATIONAL PSYCHOGERIATRICS* 2015;**27**:S119-S19.
30. Li C-C, Chen M-L, Chang T-C, et al. Social support buffers the effect of self-esteem on quality of life of early-stage cervical cancer survivors in Taiwan. *European Journal of Oncology Nursing* 2015;**19**(5):486-94.
31. Gilbert SM, Dunn RL, Hollenbeck BK, et al. Development and validation of the Bladder Cancer Index: a comprehensive, disease specific measure of health related quality of life in patients with localized bladder cancer. *The Journal of urology* 2010;**183**(5):1764-70.
32. Dargis L, Trudel G, Cadieux J, et al. Validation of the International Index of Erectile Function (IIEF) and presentation of norms in older men. *Sexologies* 2013;**22**(1):e20-e26.
33. Baser RE, Li Y, Carter J. Psychometric validation of the Female Sexual Function Index (FSFI) in cancer survivors. *Cancer* 2012;**118**(18):4606-18.
34. Eypasch E, Williams J, Wood-Dauphinee S, et al. Gastrointestinal Quality of Life Index: development, validation and application of a new instrument. *British Journal of Surgery* 1995;**82**(2):216-22.
35. Hajebrahimi S, Nourizadeh D, Hamedani R, et al. Validity and reliability of the International Consultation on Incontinence Questionnaire-Urinary Incontinence Short Form and its correlation with urodynamic findings. *Urology journal* 2012;**9**(4):685.
36. Gray M. Psychometric evaluation of the international prostate symptom score. *Urologic nursing* 1998;**18**(3):175.
37. Watts NB, Lewiecki EM, Miller PD, et al. National Osteoporosis Foundation 2008 Clinician's Guide to Prevention and Treatment of Osteoporosis and the World Health Organization Fracture Risk Assessment Tool (FRAX): what they mean to the bone densitometrist and bone technologist. *Journal of Clinical Densitometry* 2008;**11**(4):473-77.
38. Mor V, Laliberte L, Morris JN, et al. The Karnofsky performance status scale: an examination of its reliability and validity in a research setting. *Cancer* 1984;**53**(9):2002-07.
39. McGowan J, Sampson M, Salzwedel DM, et al. PRESS Peer Review of Electronic Search Strategies: 2015 Guideline Statement. *Journal of clinical epidemiology* 2016.
40. Effective Practice and Organisation of Care (EPOC). EPOC Resources for review authors. Oslo: Norwegian Knowledge Centre for the Health Services; 2015. Secondary Effective Practice and Organisation of Care (EPOC). EPOC Resources for review authors. Oslo: Norwegian

1  
2  
3  
4  
5  
6  
7  
8  
9  
10  
11  
12  
13  
14  
15  
16  
17  
18  
19  
20  
21  
22  
23  
24  
25  
26  
27  
28  
29  
30  
31  
32  
33  
34  
35  
36  
37  
38  
39  
40  
41  
42  
43  
44  
45  
46  
47  
48  
49  
50  
51  
52  
53  
54  
55  
56  
57  
58  
59  
60

Knowledge Centre for the Health Services; 2015. <http://epoc.cochrane.org/epoc-specific-resources-review-authors>.

For peer review only



| Search Strategy                                              |                    |                                                                                                                                                                                                                                                                                                                                                                                                                                                                                                                                                                                                                                                                                                                                                                                                                                                                                                                                                                                                                                                                                                                                                                                                                                                                                                                                                                                                                                                                                                                                                                                                                                                                                                                                                                                                                                                                                                                                                                                                                                                                                                                                                                                                                                                                                                                                                                                                                                                                                                                                                                                                                                                                                                                                                                                                                                                                                                                                                                                                                                                                                                                                                                                                                                                                                                                                                                                                                                                                                                                                                      |
|--------------------------------------------------------------|--------------------|------------------------------------------------------------------------------------------------------------------------------------------------------------------------------------------------------------------------------------------------------------------------------------------------------------------------------------------------------------------------------------------------------------------------------------------------------------------------------------------------------------------------------------------------------------------------------------------------------------------------------------------------------------------------------------------------------------------------------------------------------------------------------------------------------------------------------------------------------------------------------------------------------------------------------------------------------------------------------------------------------------------------------------------------------------------------------------------------------------------------------------------------------------------------------------------------------------------------------------------------------------------------------------------------------------------------------------------------------------------------------------------------------------------------------------------------------------------------------------------------------------------------------------------------------------------------------------------------------------------------------------------------------------------------------------------------------------------------------------------------------------------------------------------------------------------------------------------------------------------------------------------------------------------------------------------------------------------------------------------------------------------------------------------------------------------------------------------------------------------------------------------------------------------------------------------------------------------------------------------------------------------------------------------------------------------------------------------------------------------------------------------------------------------------------------------------------------------------------------------------------------------------------------------------------------------------------------------------------------------------------------------------------------------------------------------------------------------------------------------------------------------------------------------------------------------------------------------------------------------------------------------------------------------------------------------------------------------------------------------------------------------------------------------------------------------------------------------------------------------------------------------------------------------------------------------------------------------------------------------------------------------------------------------------------------------------------------------------------------------------------------------------------------------------------------------------------------------------------------------------------------------------------------------------------|
| Database                                                     | Data last searched | Search Syntax                                                                                                                                                                                                                                                                                                                                                                                                                                                                                                                                                                                                                                                                                                                                                                                                                                                                                                                                                                                                                                                                                                                                                                                                                                                                                                                                                                                                                                                                                                                                                                                                                                                                                                                                                                                                                                                                                                                                                                                                                                                                                                                                                                                                                                                                                                                                                                                                                                                                                                                                                                                                                                                                                                                                                                                                                                                                                                                                                                                                                                                                                                                                                                                                                                                                                                                                                                                                                                                                                                                                        |
| The Cochrane Central Register of Controlled Trials (CENTRAL) | 13/12/2016         | <ol style="list-style-type: none"> <li>[mh "Urinary Bladder Neoplasms"] OR [mh "Carcinoma, Transitional Cell"] OR ("bladder cancer"):ti,ab,kw OR ("bladder carcinoma"):ti,ab,kw OR ("bladder malignancy"):ti,ab,kw OR ("bladder neoplasm"):ti,ab,kw OR ("bladder tumor"):ti,ab,kw OR ("transitional cell carcinoma"):ti,ab,kw OR ("transitional cell cancer"):ti,ab,kw OR ("transitional cell malignancies"):ti,ab,kw OR ("transitional cell tumor"):ti,ab,kw OR ("urothelial cancer"):ti,ab,kw OR ("urothelial carcinoma"):ti,ab,kw OR ("urothelial malignancy"):ti,ab,kw OR ("urothelial tumor"):ti,ab,kw OR ("urinary tract carcinoma"):ti,ab,kw OR ("urinary tract cancer"):ti,ab,kw OR ("urinary tract malignancy"):ti,ab,kw OR ("urinary tract tumor"):ti,ab,kw</li> <li>[mh "exercise"] OR [mh "Exercise Movement Techniques"] OR [mh "Sports"] OR [mh "Physical Fitness"] OR [mh "Physical Exertion"] OR [mh "Exercise Therapy"] OR [mh "Dance Therapy"] OR [mh "Recreation Therapy"] OR [mh "Rehabilitation, Vocational"] OR [mh "Telerehabilitation"] OR [mh "Occupational Therapy"] OR [mh "Self Care"] OR [mh "Urinary Incontinence/rehabilitation"] OR [mh "Pelvic Floor/therapy"] OR ("self care"):ti,ab,kw OR (exercise):ti,ab,kw OR (sport):ti,ab,kw OR ("physical activity"):ti,ab,kw OR (physiotherapy):ti,ab,kw OR (kinesiotherapy):ti,ab,kw OR ("physical conditioning"):ti,ab,kw OR ("physical education"):ti,ab,kw OR ("physical fitness"):ti,ab,kw OR (running):ti,ab,kw OR (swimming):ti,ab,kw OR (walking):ti,ab,kw OR (jogging):ti,ab,kw OR ("weight lifting"):ti,ab,kw OR (dance):ti,ab,kw OR ("tai chi"):ti,ab,kw OR (yoga):ti,ab,kw OR (pilates):ti,ab,kw OR (gymnastic):ti,ab,kw OR ("resistance training"):ti,ab,kw OR ("aerobic training"):ti,ab,kw OR ("anaerobic training"):ti,ab,kw OR ("muscle training"):ti,ab,kw OR (stretching):ti,ab,kw OR (aerobic):ti,ab,kw OR (rehabilitation):ti,ab,kw OR ("prehabilitation"):ti,ab,kw OR (prehabilitation):ti,ab,kw OR (aquagym):ti,ab,kw OR (football):ti,ab,kw OR (soccer):ti,ab,kw OR ("circuit training"):ti,ab,kw OR (fitness):ti,ab,kw OR ("bladder training"):ti,ab,kw OR ("incontinence management"):ti,ab,kw OR ("urinary management"):ti,ab,kw</li> <li>[mh "Tertiary Prevention"] OR [mh "Social Support"] OR [mh "Psychiatric Rehabilitation"] OR [mh "Health Promotion"] OR [mh "Psychotherapy"] OR [mh "Counseling"] OR [mh "Patient Education as Topic"] OR [mh "Sex Education"] OR [mh "Sexuality/rehabilitation"] OR [mh "Health Literacy"] OR [mh "psychology/education"] OR [mh "psychology/therapy"] OR [mh "Problem Solving"] OR [mh "Mind-body therapies"] OR [mh "patient participation"] OR [mh "Existentialism"] OR [mh "spiritual therapies"] OR [mh "problem-based learning"] OR [mh "Sedentary Lifestyle"] OR ("psychosocial intervention"):ti,ab,kw OR ("psychologic intervention"):ti,ab,kw OR ("psychological intervention"):ti,ab,kw OR ("psychology intervention"):ti,ab,kw OR ("social intervention"):ti,ab,kw OR ("psychosocial therapy"):ti,ab,kw OR ("psychologic therapy"):ti,ab,kw OR ("psychological therapy"):ti,ab,kw OR ("psychology therapies"):ti,ab,kw OR (psychotherapy):ti,ab,kw OR ("tertiary health care"):ti,ab,kw OR ("tertiary prevention"):ti,ab,kw OR ("social support"):ti,ab,kw OR ("social behavior"):ti,ab,kw OR ("support care"):ti,ab,kw OR ("supportive care"):ti,ab,kw OR ("behavior treatment"):ti,ab,kw OR ("behavior therapy"):ti,ab,kw OR ("cognitive treatment"):ti,ab,kw OR ("cognitive</li> </ol> |

1  
2  
3  
4  
5  
6  
7  
8  
9  
10  
11  
12  
13  
14  
15  
16  
17  
18  
19  
20  
21  
22  
23  
24  
25  
26  
27  
28  
29  
30  
31  
32  
33  
34  
35  
36  
37  
38  
39  
40  
41  
42  
43  
44  
45  
46  
47

|                                |            |                                                                                                                                                                                                                                                                                                                                                                                                                                                                                                                                                                                                                                                                                                                                                                                                                                                                                                                                                                                                                                                                                                                                                                                                                                                                                                                                                                                                                                                                                                                                                                                                                                                                                                                                                                                                                                                                                                                                                                                                         |
|--------------------------------|------------|---------------------------------------------------------------------------------------------------------------------------------------------------------------------------------------------------------------------------------------------------------------------------------------------------------------------------------------------------------------------------------------------------------------------------------------------------------------------------------------------------------------------------------------------------------------------------------------------------------------------------------------------------------------------------------------------------------------------------------------------------------------------------------------------------------------------------------------------------------------------------------------------------------------------------------------------------------------------------------------------------------------------------------------------------------------------------------------------------------------------------------------------------------------------------------------------------------------------------------------------------------------------------------------------------------------------------------------------------------------------------------------------------------------------------------------------------------------------------------------------------------------------------------------------------------------------------------------------------------------------------------------------------------------------------------------------------------------------------------------------------------------------------------------------------------------------------------------------------------------------------------------------------------------------------------------------------------------------------------------------------------|
|                                |            | <p>therapy"):ti,ab,kw OR (counseling):ti,ab,kw OR ("patient education"):ti,ab,kw OR ("patient participation"):ti,ab,kw OR ("health education"):ti,ab,kw OR ("sex education"):ti,ab,kw OR ("sexual education"):ti,ab,kw OR (psychoeducation):ti,ab,kw OR ("sex therapy"):ti,ab,kw OR ("sexual therapy"):ti,ab,kw OR ("stoma education"):ti,ab,kw OR ("stoma therapy"):ti,ab,kw OR ("health literacy"):ti,ab,kw OR ("health promotion"):ti,ab,kw OR ("health behavior"):ti,ab,kw OR ("cognitive behavior"):ti,ab,kw OR ("behavior training"):ti,ab,kw OR ("behavioral training"):ti,ab,kw OR (CBT) OR ("complementary therapy"):ti,ab,kw OR ("mind body therapy"):ti,ab,kw OR ("spiritual therapy"):ti,ab,kw OR ("relaxation therapy"):ti,ab,kw OR ("relaxation training"):ti,ab,kw OR ("client centered therapy"):ti,ab,kw OR (conditioning):ti,ab,kw OR ("stoma management"):ti,ab,kw OR ("bowel management"):ti,ab,kw OR (coping):ti,ab,kw OR (mindfulness):ti,ab,kw OR (empowerment):ti,ab,kw OR ("self-monitoring"):ti,ab,kw OR ("motivation therapy"):ti,ab,kw OR ("motivational therapy"):ti,ab,kw OR ("motivation interviewing"):ti,ab,kw OR ("motivational interviewing"):ti,ab,kw OR ("motivation treatment"):ti,ab,kw OR ("motivational treatment"):ti,ab,kw OR (psychology):ti,ab,kw OR ("problem solving"):ti,ab,kw OR ("psychosocial care"):ti,ab,kw OR ("psychological care"):ti,ab,kw OR ("psychologic care"):ti,ab,kw OR ("caregiver support"):ti,ab,kw OR (sociotherapy):ti,ab,kw OR ("occupational therapy"):ti,ab,kw OR ("care delivery"):ti,ab,kw OR ("functional therapy"):ti,ab,kw OR ("functional training"):ti,ab,kw OR (existentialism):ti,ab,kw OR ("spiritual healing"):ti,ab,kw OR ("spiritual therapy"):ti,ab,kw OR ("transcultural care"):ti,ab,kw OR ("life style"):ti,ab,kw</p> <p>4. 2 OR 3<br/>5. 1 AND 4</p>                                                                                                                                                          |
| MEDLINE (via PubMed interface) | 13/12/2016 | <p>1. "Urinary Bladder Neoplasms"[MESH] OR "Urinary Bladder/abnormalities"[MESH] OR "Urinary bladder/surgery"[MESH] OR "Carcinoma, Transitional Cell"[Mesh] OR "bladder cancer"[TIAB] OR "bladder cancers"[TIAB] OR "bladder carcinoma"[TIAB] OR "bladder carcinomas"[TIAB] OR "bladder malignancy"[TIAB] OR "bladder malignancies"[TIAB] OR "bladder neoplasm"[TIAB] OR "bladder neoplasms"[TIAB] OR "bladder tumor"[TIAB] OR "bladder tumors"[TIAB] OR "bladder tumour"[TIAB] OR "bladder tumours"[TIAB] OR "transitional cell carcinoma"[TIAB] OR "transitional cell carcinomas"[TIAB] OR "transitional cell cancer"[TIAB] OR "transitional cell cancers"[TIAB] OR "transitional cell malignancies"[TIAB] OR "transitional cell tumor"[TIAB] OR "transitional cell tumors"[TIAB] OR "transitional cell tumour"[TIAB] OR "transitional cell tumours"[TIAB] OR "urothelial cancer"[TIAB] OR "urothelial cancers"[TIAB] OR "urothelial carcinoma"[TIAB] OR "urothelial carcinomas"[TIAB] OR "urothelial malignancy"[TIAB] OR "urothelial malignancies"[TIAB] OR "urothelial tumor"[TIAB] OR "urothelial tumors"[TIAB] OR "urothelial tumour"[TIAB] OR "urothelial tumours"[TIAB] OR "urinary tract carcinoma"[TIAB] OR "urinary tract carcinomas"[TIAB] OR "urinary tract cancer"[TIAB] OR "urinary tract cancers"[TIAB] OR "urinary tract malignancy"[TIAB] OR "urinary tract malignancies"[TIAB] OR "urinary tract tumor"[TIAB] OR "urinary tract tumors"[TIAB] OR "urinary tract tumour"[TIAB] OR "urinary tract tumours"[TIAB]</p> <p>2. "exercise"[MESH] OR "Exercise Movement Techniques"[Mesh] OR "Sports"[Mesh] OR "Physical Fitness"[Mesh] OR "Physical Exertion"[Mesh] OR "Exercise Therapy"[Mesh] OR "Dance Therapy"[Mesh] OR "Recreation Therapy"[Mesh] OR "Rehabilitation, Vocational"[Mesh] OR "Telerehabilitation"[Mesh] OR "Occupational Therapy"[Mesh] OR "Self Care"[Mesh] OR "Urinary Incontinence/rehabilitation"[Mesh] OR "Pelvic Floor/therapy"[Mesh] OR "self care"[TIAB] OR</p> |

- 1  
2  
3  
4  
5  
6  
7  
8  
9  
10  
11  
12  
13  
14  
15  
16  
17  
18  
19  
20  
21  
22  
23  
24  
25  
26  
27  
28  
29  
30  
31  
32  
33  
34  
35  
36  
37  
38  
39  
40  
41  
42  
43  
44  
45  
46  
47
- “exercise”[TIAB] OR “exercising”[TIAB] OR “exercises”[TIAB] OR “sport”[TIAB] OR “sports”[TIAB] OR “physical activity”[TIAB] OR “physical activities”[TIAB] OR “physiotherapy”[TIAB] OR “kinesiotherapy”[TIAB] OR “physical conditioning”[TIAB] OR physical education\*[TIAB] OR “physical fitness”[TIAB] OR “running”[TIAB] OR “swimming”[TIAB] OR “walking”[TIAB] OR “jogging”[TIAB] OR “weight lifting”[TIAB] OR “dancing”[TIAB] OR “dance”[TIAB] OR “tai chi”[TIAB] OR “tai ji”[TIAB] OR “yoga”[TIAB] OR “pilates”[TIAB] OR “gymnastic”[TIAB] OR “gymnastics”[TIAB] OR “resistance training”[TIAB] OR “aerobic training”[TIAB] OR “anaerobic training”[TIAB] OR “muscle training”[TIAB] OR “stretching”[TIAB] OR “aerobic”[TIAB] OR “aerobics”[TIAB] OR “rehabilitation”[TIAB] OR “pre-habilitation”[TIAB] OR “prehabilitation”[TIAB] OR “aquagym”[TIAB] OR “football”[TIAB] OR “soccer”[TIAB] OR “circuit training”[TIAB] OR “fitness”[TIAB] OR “bladder training”[TIAB] OR “incontinence management”[TIAB] OR “urinary management”[TIAB]
3. "Tertiary Prevention"[Mesh] OR "Social Support"[Mesh] OR "Psychiatric Rehabilitation"[Mesh] OR "Health Promotion"[Mesh] OR "Psychotherapy"[Mesh] OR "Counseling"[Mesh] OR "Patient Education as Topic"[Mesh] OR "Sex Education"[Mesh] OR "Sexuality/rehabilitation"[Mesh] OR "Health Literacy"[Mesh] OR "psychology/education"[MESH] OR "psychology/therapy"[MESH] OR "Problem Solving"[MESH] OR "Mind-body therapies"[Mesh] OR "patient participation"[MESH] OR "Existentialism"[MESH] OR "spiritual therapies"[MESH] OR "problem-based learning"[MESH] OR "Sedentary Lifestyle"[Mesh] OR psychosocial intervention\*[TIAB] OR psychologic intervention\*[TIAB] OR psychological intervention\*[TIAB] OR psychology intervention\*[TIAB] OR social intervention\*[TIAB] OR psychosocial therap\*[TIAB] OR psychologic therap\*[TIAB] OR “psychological therapy”[TIAB] OR “psychological therapies”[TIAB] OR “psychology therapies”[TIAB] OR “psychotherapy”[TIAB] OR “tertiary health care”[TIAB] OR “tertiary prevention”[TIAB] OR “social support”[TIAB] OR social behav\*[TIAB] OR “support care”[TIAB] OR “supportive care”[TIAB] OR behavior treatment\*[TIAB] OR behavioral treatment\*[TIAB] OR behavior therap\*[TIAB] OR behavioral therap\*[TIAB] OR cognitive treatment\*[TIAB] OR cognitive therap\*[TIAB] OR “counseling”[TIAB] OR patient education\*[TIAB] OR “patient participation”[TIAB] OR health education\*[TIAB] OR sex education\*[TIAB] OR sexual education\*[TIAB] OR psychoeducation\*[TIAB] OR sex therap\*[TIAB] OR sexual therap\*[TIAB] OR stoma education\*[TIAB] OR stoma therap\*[TIAB] OR health literac\*[TIAB] OR health promotion\*[TIAB] OR health behavio\*[TIAB] OR “cognitive behavior”[TIAB] OR “behavior training”[TIAB] OR “behavioral training”[TIAB] OR “behavioural training”[TIAB] OR CBT[TIAB] OR complementary therap\*[TIAB] OR mind body therap\*[TIAB] OR spiritual therap\*[TIAB] OR relaxation therap\*[TIAB] OR “relaxation training”[TIAB] OR client centered therap\*[TIAB] OR conditioning[TIAB] OR stoma management[TIAB] OR bowel management[TIAB] OR coping [TIAB] OR mindfulness[TIAB] OR empowerment[TIAB] OR empowering[TIAB] OR self-monitoring\*[TIAB] OR motivation therap\*[TIAB] OR motivational therap\*[TIAB] OR motivation interview[TIAB] OR motivation interviewing[TIAB] OR motivational interview[TIAB] OR motivational interviewing[TIAB] OR motivation treatment\*[TIAB] OR motivational treatment\*[TIAB] OR psychology[TIAB] OR problem solv\*[TIAB] OR “psychosocial care”[TIAB] OR “psychological care”[TIAB] OR “psychologic care”[TIAB] OR caregiver support\*[TIAB] OR sociotherap\*[TIAB] OR occupational therap\*[TIAB] OR care deliver\*[TIAB] OR functional therap\*[TIAB] OR “functional training”[TIAB] OR existentialism[TIAB] OR “spiritual healing”[TIAB] OR spiritual therap\*[TIAB] OR “transcultural care”[TIAB] OR “life style”[TIAB]
4. 2 OR 3

## 5. 1 AND 4

|                                         |            |                                                                                                                                                                                                                                                                                                                                                                                                                                                                                                                                                                                                                                                                                                                                                                                                                                                                                                                                                                                                                                                                                                                                                                                                                                                                                                                                                                                                                                                                                                                                                                                                                                                                                                                                                                                                                                                                                                                                                                                                                                                                                                                                                                                                                                                                                                                                                                                                                                                                                                                                                                                                                                                                                                                                                                                                                                                                                                                                                                                                                                                                                                                                                                                                                                                                                                                                                                                                                                                                                                                                                                                                                                                                                                                                                                                                                                                                                                                                                                                                                                                                                                                                                                                                                                                                                                                                                                                                                                                                                                                                        |
|-----------------------------------------|------------|----------------------------------------------------------------------------------------------------------------------------------------------------------------------------------------------------------------------------------------------------------------------------------------------------------------------------------------------------------------------------------------------------------------------------------------------------------------------------------------------------------------------------------------------------------------------------------------------------------------------------------------------------------------------------------------------------------------------------------------------------------------------------------------------------------------------------------------------------------------------------------------------------------------------------------------------------------------------------------------------------------------------------------------------------------------------------------------------------------------------------------------------------------------------------------------------------------------------------------------------------------------------------------------------------------------------------------------------------------------------------------------------------------------------------------------------------------------------------------------------------------------------------------------------------------------------------------------------------------------------------------------------------------------------------------------------------------------------------------------------------------------------------------------------------------------------------------------------------------------------------------------------------------------------------------------------------------------------------------------------------------------------------------------------------------------------------------------------------------------------------------------------------------------------------------------------------------------------------------------------------------------------------------------------------------------------------------------------------------------------------------------------------------------------------------------------------------------------------------------------------------------------------------------------------------------------------------------------------------------------------------------------------------------------------------------------------------------------------------------------------------------------------------------------------------------------------------------------------------------------------------------------------------------------------------------------------------------------------------------------------------------------------------------------------------------------------------------------------------------------------------------------------------------------------------------------------------------------------------------------------------------------------------------------------------------------------------------------------------------------------------------------------------------------------------------------------------------------------------------------------------------------------------------------------------------------------------------------------------------------------------------------------------------------------------------------------------------------------------------------------------------------------------------------------------------------------------------------------------------------------------------------------------------------------------------------------------------------------------------------------------------------------------------------------------------------------------------------------------------------------------------------------------------------------------------------------------------------------------------------------------------------------------------------------------------------------------------------------------------------------------------------------------------------------------------------------------------------------------------------------------------------------------------|
| EMBASE (via<br>Embase.com<br>interface) | 13/12/2016 | <ol style="list-style-type: none"> <li data-bbox="699 279 1999 646">1. 'bladder tumor'/exp OR 'urinary tract carcinoma'/exp OR 'bladder surgery'/exp OR 'transitional cell carcinoma'/exp OR 'bladder cancer':ab,ti OR 'bladder cancers':ab,ti OR 'bladder carcinoma':ab,ti OR 'bladder carcinomas':ab,ti OR 'bladder malignancy':ab,ti OR 'bladder malignancies':ab,ti OR 'bladder neoplasm':ab,ti OR 'bladder neoplasms':ab,ti OR 'bladder tumor':ab,ti OR 'bladder tumors':ab,ti OR 'bladder tumour':ab,ti OR 'bladder tumours':ab,ti OR 'transitional cell carcinoma':ab,ti OR 'transitional cell carcinomas':ab,ti OR 'transitional cell cancer':ab,ti OR 'transitional cell cancers':ab,ti OR 'transitional cell malignancies':ab,ti OR 'transitional cell tumor':ab,ti OR 'transitional cell tumors':ab,ti OR 'transitional cell tumour':ab,ti OR 'transitional cell tumours':ab,ti OR 'urothelial cancer':ab,ti OR 'urothelial cancers':ab,ti OR 'urothelial carcinoma':ab,ti OR 'urothelial carcinomas':ab,ti OR 'urothelial malignancy':ab,ti OR 'urothelial malignancies':ab,ti OR 'urothelial tumor':ab,ti OR 'urothelial tumors':ab,ti OR 'urothelial tumour':ab,ti OR 'urothelial tumours':ab,ti OR 'urinary tract carcinoma':ti,ab OR 'urinary tract carcinomas':ti,ab OR 'urinary tract cancer':ti,ab OR 'urinary tract cancers':ti,ab OR 'urinary tract malignance':ti,ab OR 'urinary tract malignancy':ti,ab OR 'urinary tract malignancies':ti,ab OR 'urinary tract tumor':ti,ab OR 'urinary tract tumors':ti,ab OR 'urinary tract tumour':ti,ab OR 'urinary tract tumours':ti,ab</li> <li data-bbox="699 646 1999 1013">2. 'physical activity'/exp OR 'exercise'/exp OR 'physiotherapy'/exp OR 'kinesiotherapy'/exp OR 'fitness'/exp OR 'sport'/exp OR 'bladder training'/exp OR 'cancer rehabilitation'/exp OR 'cognitive rehabilitation'/exp OR 'functional training'/exp OR 'geriatric rehabilitation'/exp OR 'muscle training'/exp OR 'home rehabilitation'/exp OR 'occupational therapy'/exp OR 'pelvic floor muscle training'/exp OR 'self care':ab,ti OR 'exercise':ab,ti OR 'exercising':ab,ti OR 'exercises':ab,ti OR 'sport':ab,ti OR 'sports':ab,ti OR 'physical activity':ab,ti OR 'physical activities':ab,ti OR 'physiotherapy':ab,ti OR 'kinesiotherapy':ab,ti OR 'physical conditioning':ab,ti OR 'physical education*':ab,ti OR 'physical fitness':ab,ti OR 'running':ab,ti OR 'swimming':ab,ti OR 'walking':ab,ti OR 'jogging':ab,ti OR 'weight lifting':ab,ti OR 'dancing':ab,ti OR 'dance':ab,ti OR 'tai chi':ab,ti OR 'tai ji':ab,ti OR 'yoga':ab,ti OR 'pilates':ab,ti OR 'gymnastic':ab,ti OR 'gymnastics':ab,ti OR 'resistance training':ab,ti OR 'aerobic training':ab,ti OR 'anaerobic training':ab,ti OR 'muscle training':ab,ti OR 'stretching':ab,ti OR 'aerobic':ab,ti OR 'aerobics':ab,ti OR 'rehabilitation':ab,ti OR 'pre-habilitation':ab,ti OR 'prehabilitation':ab,ti OR 'aquagym':ab,ti OR 'football':ab,ti OR 'soccer':ab,ti OR 'circuit training':ab,ti OR 'fitness':ab,ti OR 'bladder training':ab,ti OR 'incontinence management':ab,ti OR 'urinary management':ab,ti</li> <li data-bbox="699 1013 1999 1343">3. 'psychosocial rehabilitation'/exp OR 'recreational therapy'/exp OR 'sociotherapy'/exp OR 'telerehabilitation'/exp OR 'vocational rehabilitation'/exp OR 'caregiver support'/exp OR 'psychosocial care'/exp OR 'social support'/exp OR 'spiritual care'/exp OR 'psychotherapy'/exp OR 'preoperative education'/exp OR 'psychoeducation'/exp OR 'patient education'/exp OR 'health promotion'/exp OR 'reinforcement'/exp OR 'patient participation'/exp OR 'counseling'/exp OR 'problem solving'/exp OR 'home physiotherapy'/exp OR 'cancer prevention'/exp OR 'learning'/exp OR 'rehabilitation care'/exp OR 'bladder and bowel management'/exp OR 'empowerment'/exp OR 'coping behavior'/exp OR 'social interaction'/exp OR 'social participation'/exp OR 'behavior change'/exp OR 'lifestyle'/exp OR 'psychosocial intervention*':ab,ti OR 'psychologic intervention*':ab,ti OR 'psychological intervention*':ab,ti OR 'psychology intervention*':ab,ti OR 'social intervention*':ab,ti OR 'psychosocial therap*':ab,ti OR 'psychologic therap*':ab,ti OR 'psychological therapy':ab,ti OR 'psychological therapies':ab,ti OR 'psychology therapies':ab,ti OR 'psychotherapy':ab,ti OR 'tertiary health care':ab,ti OR 'tertiary prevention':ab,ti OR 'social support':ab,ti OR 'social behav*':ab,ti OR 'support care':ab,ti OR 'supportive</li> </ol> |
|-----------------------------------------|------------|----------------------------------------------------------------------------------------------------------------------------------------------------------------------------------------------------------------------------------------------------------------------------------------------------------------------------------------------------------------------------------------------------------------------------------------------------------------------------------------------------------------------------------------------------------------------------------------------------------------------------------------------------------------------------------------------------------------------------------------------------------------------------------------------------------------------------------------------------------------------------------------------------------------------------------------------------------------------------------------------------------------------------------------------------------------------------------------------------------------------------------------------------------------------------------------------------------------------------------------------------------------------------------------------------------------------------------------------------------------------------------------------------------------------------------------------------------------------------------------------------------------------------------------------------------------------------------------------------------------------------------------------------------------------------------------------------------------------------------------------------------------------------------------------------------------------------------------------------------------------------------------------------------------------------------------------------------------------------------------------------------------------------------------------------------------------------------------------------------------------------------------------------------------------------------------------------------------------------------------------------------------------------------------------------------------------------------------------------------------------------------------------------------------------------------------------------------------------------------------------------------------------------------------------------------------------------------------------------------------------------------------------------------------------------------------------------------------------------------------------------------------------------------------------------------------------------------------------------------------------------------------------------------------------------------------------------------------------------------------------------------------------------------------------------------------------------------------------------------------------------------------------------------------------------------------------------------------------------------------------------------------------------------------------------------------------------------------------------------------------------------------------------------------------------------------------------------------------------------------------------------------------------------------------------------------------------------------------------------------------------------------------------------------------------------------------------------------------------------------------------------------------------------------------------------------------------------------------------------------------------------------------------------------------------------------------------------------------------------------------------------------------------------------------------------------------------------------------------------------------------------------------------------------------------------------------------------------------------------------------------------------------------------------------------------------------------------------------------------------------------------------------------------------------------------------------------------------------------------------------------------------------------------------|

1  
2  
3  
4  
5  
6  
7  
8  
9  
10  
11  
12  
13  
14  
15  
16  
17  
18  
19  
20  
21  
22  
23  
24  
25  
26  
27  
28  
29  
30  
31  
32  
33  
34  
35  
36  
37  
38  
39  
40  
41  
42  
43  
44  
45  
46  
47

|                       |                   |                                                                                                                                                                                                                                                                                                                                                                                                                                                                                                                                                                                                                                                                                                                                                                                                                                                                                                                                                                                                                                                                                                                                                                                                                                                                                                                                                                                                                                                                                                                                                                                                                                                                                                                                                                                                                                                                                                                                                                                                                                                                                                                                                                            |
|-----------------------|-------------------|----------------------------------------------------------------------------------------------------------------------------------------------------------------------------------------------------------------------------------------------------------------------------------------------------------------------------------------------------------------------------------------------------------------------------------------------------------------------------------------------------------------------------------------------------------------------------------------------------------------------------------------------------------------------------------------------------------------------------------------------------------------------------------------------------------------------------------------------------------------------------------------------------------------------------------------------------------------------------------------------------------------------------------------------------------------------------------------------------------------------------------------------------------------------------------------------------------------------------------------------------------------------------------------------------------------------------------------------------------------------------------------------------------------------------------------------------------------------------------------------------------------------------------------------------------------------------------------------------------------------------------------------------------------------------------------------------------------------------------------------------------------------------------------------------------------------------------------------------------------------------------------------------------------------------------------------------------------------------------------------------------------------------------------------------------------------------------------------------------------------------------------------------------------------------|
|                       |                   | <p>care':ab,ti OR 'behavior treatment*':ab,ti OR 'behavioral treatment*':ab,ti OR 'behavior therap*':ab,ti OR 'behavioral therap*':ab,ti OR 'cognitive treatment*':ab,ti OR 'cognitive therap*':ab,ti OR 'counseling':ab,ti OR 'patient education*':ab,ti OR 'patient participation':ab,ti OR 'health education*':ab,ti OR 'sex education*':ab,ti OR 'sexual education*':ab,ti OR 'psychoeducation*':ab,ti OR 'sex therap*':ab,ti OR 'sexual therap*':ab,ti OR 'stoma education*':ab,ti OR 'stoma therap*':ab,ti OR 'health literac*':ab,ti OR 'health promotion*':ab,ti OR 'health behavio*':ab,ti OR 'cognitive behavior':ab,ti OR 'behavior training':ab,ti OR 'behavioral training':ab,ti OR 'behavioural training':ab,ti OR 'CBT':ab,ti OR 'complementary therap*':ab,ti OR 'mind body therap*':ab,ti OR 'spiritual therap*':ab,ti OR 'relaxation therap*':ab,ti OR 'relaxation training':ab,ti OR 'client centered therap*':ab,ti OR 'conditioning':ab,ti OR 'stoma management':ab,ti OR 'bowel management':ab,ti OR 'coping':ab,ti OR 'mindfulness':ab,ti OR 'empowerment':ab,ti OR 'empowering':ab,ti OR 'self-monitoring*':ab,ti OR 'motivation therap*':ab,ti OR 'motivational therap*':ab,ti OR 'motivation interview':ab,ti OR 'motivation interviewing':ab,ti OR 'motivational interview':ab,ti OR 'motivational interviewing':ab,ti OR 'motivation treatment*':ab,ti OR 'motivational treatment*':ab,ti OR 'psychology':ab,ti OR 'problem solv*':ab,ti OR 'psychosocial care':ab,ti OR 'psychological care':ab,ti OR 'psychologic care':ab,ti OR 'caregiver support*':ab,ti OR 'sociotherap*':ab,ti OR 'occupational therap*':ab,ti OR 'care deliver*':ab,ti OR 'functional therap*':ab,ti OR 'functional training':ab,ti OR 'existentialism':ab,ti OR 'spiritual healing':ab,ti OR 'spiritual therap*':ab,ti OR 'transcultural care':ab,ti OR 'life style':ab,ti</p> <p>4. 2 OR 3<br/>5. 1 AND 4</p>                                                                                                                                                                                                                                                        |
| <p>Web of Science</p> | <p>13/12/2016</p> | <p>1. TS=("bladder cancer") OR TS=("bladder cancers") OR TS=("bladder carcinoma") OR TS=("bladder carcinomas") OR TS=("bladder malignancy") OR TS=("bladder malignancies") OR TS=("bladder neoplasm") OR TS=("bladder neoplasms") OR TS=("bladder tumor") OR TS=("bladder tumors")OR TS=("bladder tumour") OR TS=("bladder tumours") OR TS=("transitional cell carcinoma") OR TS=("transitional cell carcinomas") OR TS=("transitional cell cancer") OR TS=("transitional cell cancers") OR TS=("transitional cell malignancies") OR TS=("transitional cell tumor") OR TS=("transitional cell tumors") OR TS=("transitional cell tumour") OR TS=("transitional cell tumours") OR TS=("urothelial cancer") OR TS=("urothelial cancers") OR TS=("urothelial carcinoma") OR TS=("urothelial carcinomas")OR TS=("urothelial malignancy") OR TS=("urothelial malignancies") OR TS=("urothelial tumor") OR TS=("urothelial tumors")OR TS=("urothelial tumour") OR TS=("urothelial tumours") OR TS=("urinary tract carcinoma") OR TS=("urinary tract carcinomas") OR TS=("urinary tract cancer") OR TS=("urinary tract cancers") OR TS=("urinary tract malignancy") OR TS=("urinary tract malignancies") OR TS=("urinary tract tumor") OR TS=("urinary tract tumors") OR TS=("urinary tract tumour") OR TS=("urinary tract tumours")</p> <p>2. TS=("self care") OR TS=(exercise) OR TS=(exercising) OR TS=(exercises) OR TS=(sport) OR TS=(sports) OR TS=("physical activity") OR TS=("physical activities") OR TS=(physiotherapy) OR TS=(kinesiotherapy) OR TS=("physical conditioning") OR TS=("physical education*") OR TS=("physical fitness") OR TS=(running) OR TS=(swimming) OR TS=(walking) OR TS=(jogging) OR TS=("weight lifting") OR TS=(dancing) OR TS=(dance) OR TS=("tai chi") OR TS=("tai ji") OR TS=(yoga) OR TS=(pilates) OR TS=(gymnastic) OR TS=(gymnastics) OR TS=("resistance training") OR TS=("aerobic training") OR TS=("anaerobic training") OR TS=("muscle training") OR TS=(stretching) OR TS=(aerobic) OR TS=(aerobics) OR TS=(rehabilitation) OR TS=("pre-habilitation") OR TS=(prehabilitation) OR TS=(aquagym) OR TS=(football) OR TS=(soccer)</p> |

1  
2  
3  
4  
5  
6  
7  
8  
9  
10  
11  
12  
13  
14  
15  
16  
17  
18  
19  
20  
21  
22  
23  
24  
25  
26  
27  
28  
29  
30  
31  
32  
33  
34  
35  
36  
37  
38  
39  
40  
41  
42  
43  
44  
45  
46  
47

OR TS=(“circuit training”) OR TS=(fitness) OR TS=(“bladder training”) OR TS=(“incontinence management”) OR TS=(“urinary management”)

3. TS=(“psychosocial intervention\*”)OR TS=(“psychologic intervention\*”) OR TS=(“psychological intervention\*”)OR TS=(“psychology intervention\*”)OR TS=(“social intervention\*”) OR TS=(“psychosocial therap\*”)OR TS=(“psychologic therap\*”)OR TS=(“psychological therapy”)OR TS=(“psychological therapies”) OR TS=(“psychology therapies”) OR TS=(psychotherapy) OR TS=(“tertiary health care”) OR TS=(“tertiary prevention”) OR TS=(“social support”) OR TS=(“social behav\*”) OR TS=(“support care”) OR TS=(“supportive care”) OR TS=(“behavior treatment\*”) OR TS=(“behavioral treatment\*”)OR TS=(“behavior therap\*”)OR TS=(“behavioral therap\*”) OR TS=(“cognitive treatment\*”) OR TS=(“cognitive therap\*”) OR TS=(counseling) OR TS=(“patient education\*”)OR TS=(“patient participation”)OR TS=(“health education\*”)OR TS=(“sex education\*”) OR TS=(“sexual education\*”)OR TS=(psychoeducation\*)OR TS=(“sex therap\*”)OR TS=(“sexual therap\*”) OR TS=(“stoma education\*”)OR TS=(“stoma therap\*”)OR TS=(“health literac\*”) OR TS=(“health promotion\*”)OR TS=(“health behavio\*”) OR TS=(“cognitive behavior”) OR TS=(“behavior training”) OR TS=(“behavioral training”) OR TS=(“behavioural training”) OR TS=(CBT) OR TS=(“complementary therap\*”)OR TS=(“mind body therap\*”)OR TS=(“spiritual therap\*”)OR TS=(“relaxation therap\*”)OR TS=(“relaxation training”) OR TS=(“client centered therap\*”)OR TS=(conditioning)OR TS=(“stoma management”)OR TS=(“bowel management”) OR TS=(coping) OR TS=(mindfulness)OR TS=(empowerment) OR TS=(empowering) OR TS=(“self-monitoring\*”)OR TS=(“motivation therap\*”)OR TS=(“motivational therap\*”)OR TS=(“motivation interview”) OR TS=(“motivation interviewing”) OR TS=(“motivational interview”) OR TS=(“motivational interviewing”) OR TS=(“motivation treatment\*”)OR TS=(“motivational treatment\*”)OR TS=(psychology)OR TS=(“problem solv\*”)OR TS=(“psychosocial care”)OR TS=(“psychological care”)OR TS=(“psychologic care”)OR TS=(“caregiver support\*”)OR TS=(sociotherap\*) OR TS=(“occupational therap\*”) OR TS=(“care deliver\*”)OR TS=(“functional therap\*”)OR TS=(“functional training”) OR TS=(existentialism)OR TS=(“spiritual healing”) OR TS=(“spiritual therap\*”)OR TS=(“transcultural care”) OR TS=(“life style”)

4. 2 OR 3

5. 1 AND 4

|       |            |                                |
|-------|------------|--------------------------------|
| PEDro | 13/12/2016 | Title/abstract: bladder cancer |
|-------|------------|--------------------------------|

The **cited and citing** articles of the included studies, retrieved with the above searches, will be screened through **Web of Science** to potentially identify other studies.

**PRISMA-P (Preferred Reporting Items for Systematic review and Meta-Analysis Protocols) 2015 checklist: recommended items to address in a systematic review protocol\***

| Section and topic                 | Item No | Checklist item                                                                                                                                                                                                                | line number          |
|-----------------------------------|---------|-------------------------------------------------------------------------------------------------------------------------------------------------------------------------------------------------------------------------------|----------------------|
| <b>ADMINISTRATIVE INFORMATION</b> |         |                                                                                                                                                                                                                               |                      |
| Title:                            |         |                                                                                                                                                                                                                               |                      |
| Identification                    | 1a      | Identify the report as a protocol of a systematic review                                                                                                                                                                      | 2-3                  |
| Update                            | 1b      | If the protocol is for an update of a previous systematic review, identify as such                                                                                                                                            |                      |
| Registration                      | 2       | If registered, provide the name of the registry (such as PROSPERO) and registration number                                                                                                                                    | 61                   |
| Authors:                          |         |                                                                                                                                                                                                                               |                      |
| Contact                           | 3a      | Provide name, institutional affiliation, e-mail address of all protocol authors; provide physical mailing address of corresponding author                                                                                     | 4-22                 |
| Contributions                     | 3b      | Describe contributions of protocol authors and identify the guarantor of the review                                                                                                                                           | 365-368              |
| Amendments                        | 4       | If the protocol represents an amendment of a previously completed or published protocol, identify as such and list changes; otherwise, state plan for documenting important protocol amendments                               |                      |
| Support:                          |         |                                                                                                                                                                                                                               |                      |
| Sources                           | 5a      | Indicate sources of financial or other support for the review                                                                                                                                                                 | 369-371              |
| Sponsor                           | 5b      | Provide name for the review funder and/or sponsor                                                                                                                                                                             | 369-371              |
| Role of sponsor or funder         | 5c      | Describe roles of funder(s), sponsor(s), and/or institution(s), if any, in developing the protocol                                                                                                                            | 370-371              |
| <b>INTRODUCTION</b>               |         |                                                                                                                                                                                                                               |                      |
| Rationale                         | 6       | Describe the rationale for the review in the context of what is already known                                                                                                                                                 | 92-176               |
| Objectives                        | 7       | Provide an explicit statement of the question(s) the review will address with reference to participants, interventions, comparators, and outcomes (PICO)                                                                      | 177-184              |
| <b>METHODS</b>                    |         |                                                                                                                                                                                                                               |                      |
| Eligibility criteria              | 8       | Specify the study characteristics (such as PICO, study design, setting, time frame) and report characteristics (such as years considered, language, publication status) to be used as criteria for eligibility for the review | 192-251              |
| Information sources               | 9       | Describe all intended information sources (such as electronic databases, contact with study authors, trial registers or other grey literature sources) with planned dates of coverage                                         | 253-260              |
| Search strategy                   | 10      | Present draft of search strategy to be used for at least one electronic database, including planned limits, such that it could be repeated                                                                                    | Supplementary file 1 |
| Study records:                    |         |                                                                                                                                                                                                                               |                      |
| Data management                   | 11a     | Describe the mechanism(s) that will be used to manage records and data throughout the review                                                                                                                                  | 263-265              |

1  
2  
3  
4  
5  
6  
7  
8  
9  
10  
11  
12  
13  
14  
15  
16  
17  
18  
19  
20  
21  
22  
23  
24  
25  
26  
27  
28  
29  
30  
31  
32  
33  
34  
35  
36  
37  
38  
39  
40  
41  
42  
43  
44  
45  
46  
47

|                                    |     |                                                                                                                                                                                                                                                                     |
|------------------------------------|-----|---------------------------------------------------------------------------------------------------------------------------------------------------------------------------------------------------------------------------------------------------------------------|
| Selection process                  | 11b | State the process that will be used for selecting studies (such as two independent reviewers) through each phase of the review (that is, screening, eligibility and inclusion in meta-analysis) 263-274                                                             |
| Data collection process            | 11c | Describe planned method of extracting data from reports (such as piloting forms, done independently, in duplicate), any processes for obtaining and confirming data from investigators 275-279                                                                      |
| Data items                         | 12  | List and define all variables for which data will be sought (such as PICO items, funding sources), any pre-planned data assumptions and simplifications 280-303                                                                                                     |
| Outcomes and prioritization        | 13  | List and define all outcomes for which data will be sought, including prioritization of main and additional outcomes, with rationale 231-249                                                                                                                        |
| Risk of bias in individual studies | 14  | Describe anticipated methods for assessing risk of bias of individual studies, including whether this will be done at the outcome or study level, or both; state how this information will be used in data synthesis 304-315                                        |
| Data synthesis                     | 15a | Describe criteria under which study data will be quantitatively synthesised 328-329                                                                                                                                                                                 |
|                                    | 15b | If data are appropriate for quantitative synthesis, describe planned summary measures, methods of handling data and methods of combining data from studies, including any planned exploration of consistency (such as I <sup>2</sup> , Kendall's τ) 326-327 335-349 |
|                                    | 15c | Describe any proposed additional analyses (such as sensitivity or subgroup analyses, meta-regression) 344, 348                                                                                                                                                      |
|                                    | 15d | If quantitative synthesis is not appropriate, describe the type of summary planned 335                                                                                                                                                                              |
| Meta-bias(es)                      | 16  | Specify any planned assessment of meta-bias(es) (such as publication bias across studies) 331-333                                                                                                                                                                   |
| Confidence in cumulative evidence  | 17  | Describe how the strength of the body of evidence will be assessed (such as GRADE) 307-309                                                                                                                                                                          |

**\* It is strongly recommended that this checklist be read in conjunction with the PRISMA-P Explanation and Elaboration (cite when available) for important clarification on the items. Amendments to a review protocol should be tracked and dated. The copyright for PRISMA-P (including checklist) is held by the PRISMA-P Group and is distributed under a Creative Commons Attribution Licence 4.0.**

*From: Shamseer L, Moher D, Clarke M, Ghersi D, Liberati A, Petticrew M, Shekelle P, Stewart L, PRISMA-P Group. Preferred reporting items for systematic review and meta-analysis protocols (PRISMA-P) 2015: elaboration and explanation. BMJ. 2015 Jan 2;349(jan02 1):g7647.*



# BMJ Open

## Rehabilitation interventions to improve patient reported outcomes and physical fitness in survivors of muscle invasive bladder cancer: a systematic review protocol

|                                 |                                                                                                                                                                                                                                                                                                                                                                                                                                                                                                                                                                                                                                                                                                                                                                                                                                                                                            |
|---------------------------------|--------------------------------------------------------------------------------------------------------------------------------------------------------------------------------------------------------------------------------------------------------------------------------------------------------------------------------------------------------------------------------------------------------------------------------------------------------------------------------------------------------------------------------------------------------------------------------------------------------------------------------------------------------------------------------------------------------------------------------------------------------------------------------------------------------------------------------------------------------------------------------------------|
| Journal:                        | <i>BMJ Open</i>                                                                                                                                                                                                                                                                                                                                                                                                                                                                                                                                                                                                                                                                                                                                                                                                                                                                            |
| Manuscript ID                   | bmjopen-2017-016054.R1                                                                                                                                                                                                                                                                                                                                                                                                                                                                                                                                                                                                                                                                                                                                                                                                                                                                     |
| Article Type:                   | Protocol                                                                                                                                                                                                                                                                                                                                                                                                                                                                                                                                                                                                                                                                                                                                                                                                                                                                                   |
| Date Submitted by the Author:   | 20-Mar-2017                                                                                                                                                                                                                                                                                                                                                                                                                                                                                                                                                                                                                                                                                                                                                                                                                                                                                |
| Complete List of Authors:       | Rammant, Elke; Universitair Ziekenhuis Gent, Department of Radiation Oncology and Experimental Cancer Research<br>Bultijnck, Renée; Universitair Ziekenhuis Gent, Department of Radiation Oncology and Experimental Cancer Research<br>Sundahl, Nora; Universitair Ziekenhuis Gent, Department of Radiation Oncology and Experimental Cancer Research<br>Ost, Piet; Universitair Ziekenhuis Gent, Department of Radiation Oncology and Experimental Cancer Research<br>Pauwels, Nele; Universitair Ziekenhuis Gent, Knowledge Center Ghent<br>Deforche, Benedicte; Universiteit Gent, Department of Public Health<br>Pieters, Ronny; Universitair Ziekenhuis Gent, Department of Urology<br>Decaestecker, Karel; Universitair Ziekenhuis Gent, Department of Urology<br>Fonteyne, Valérie; Universitair Ziekenhuis Gent, Department of Radiation Oncology and Experimental Cancer Research |
| <b>Primary Subject Heading</b>: | Urology                                                                                                                                                                                                                                                                                                                                                                                                                                                                                                                                                                                                                                                                                                                                                                                                                                                                                    |
| Secondary Subject Heading:      | Evidence based practice, Oncology, Rehabilitation medicine                                                                                                                                                                                                                                                                                                                                                                                                                                                                                                                                                                                                                                                                                                                                                                                                                                 |
| Keywords:                       | Muscle invasive bladder cancer, Exercise, Psychosocial intervention, systematic review, Rehabilitation                                                                                                                                                                                                                                                                                                                                                                                                                                                                                                                                                                                                                                                                                                                                                                                     |
|                                 |                                                                                                                                                                                                                                                                                                                                                                                                                                                                                                                                                                                                                                                                                                                                                                                                                                                                                            |

SCHOLARONE™  
Manuscripts

1  
2  
3 **Rehabilitation interventions to improve patient reported outcomes and**  
4 **physical fitness in survivors of muscle invasive bladder cancer: a systematic**  
5 **review protocol**  
6  
7

8 Elke Rammant<sup>1</sup>, Renée Bultijnck<sup>1</sup>, Nora Sundahl<sup>1</sup>, Piet Ost<sup>1</sup>, Nele S. Pauwels<sup>2</sup>, Benedicte  
9 Deforche<sup>3</sup>, Ronny Pieters<sup>4</sup>, Karel Decaestecker<sup>4</sup>, Valérie Fonteyne<sup>1</sup>  
10  
11

12  
13  
14 **Affiliations:**

- 15  
16 1. Department of Radiation Oncology and Experimental Cancer Research, Ghent  
17 University Hospital, Ghent, Belgium  
18 2. Knowledge Center Ghent, Ghent University Hospital, Ghent, Belgium  
19 3. Department of Public Health, Ghent University, Ghent, Belgium  
20 4. Department of Urology, Ghent University Hospital, Ghent, Belgium  
21  
22  
23  
24

25 **Corresponding Author:**

26  
27  
28 Elke Rammant, MSc.  
29 Department of Radiation Oncology and Experimental Cancer Research,  
30 Ghent University Hospital  
31 De Pintelaan 185, B-9000 Ghent, Belgium  
32 Tel: +32 9 33 21552  
33 E-mail: [elke.rammant@ugent.be](mailto:elke.rammant@ugent.be)  
34  
35  
36

37 **Word count excluding title page, abstract, references, figures and tables: 3576**  
38  
39  
40  
41  
42  
43  
44  
45  
46  
47  
48  
49  
50  
51  
52  
53  
54  
55  
56  
57  
58  
59  
60

## ABSTRACT

### Introduction

Survivors of muscle invasive bladder cancer (MIBC) experience physical and psychosocial side effects of cancer diagnosis and treatment. These negative side effects have a crucial impact on the quality of life (QoL). To date, there is evidence that rehabilitation interventions such as physical activity and psychosocial support have a positive effect on the QoL of cancer survivors. Unfortunately, there are no specific guidelines for rehabilitation or survivorship programs for MIBC survivors. Therefore, this systematic review aims to assess the effects of exercise-based and psychosocial rehabilitation interventions for MIBC survivors.

### Methods and analysis

The approach of this review is consistent with the Cochrane methodology. Randomized controlled trials and non-randomized studies will be included. The population of interest is patients ( $\geq 18$  years of age) with diagnosis of MIBC and there will be two eligible intervention types for inclusion: exercise-based and psychosocial rehabilitation interventions. The primary outcome measures are patient reported outcomes (e.g. QoL, fatigue, pain) and physical fitness. Studies will be identified independently by two review authors by searching the Cochrane Central Register of Controlled Trials, MEDLINE, Embase, Web of Science and the Physiotherapy Evidence Database. A third reviewer will be asked by disagreements. Risk of bias will be assessed using the Cochrane Collaboration tool and the Newcastle-Ottawa Scale. Data will be summarized descriptively. If homogeneity of the studies is sufficient, meta-analysis will be undertaken.

### Discussion

This systematic review is expected to provide guidance to development of evidence-based rehabilitation or survivorship programs for MIBC survivors. The broad scope of this review (i.e. different interventions and study designs) is needed to have a comprehensive view on effective rehabilitation interventions.

### Ethics and dissemination

Ethics approval is not required, as no primary data will be collected. Results will be disseminated through a peer-reviewed publication.

**PROSPERO registration number:** CRD42017055306

### Keywords

Bladder neoplasm— exercise – psychosocial intervention – rehabilitation

## Strengths and limitations of this study

### Strengths

- The overall approach of this review is consistent with the methodology described in the Cochrane Handbook for Systematic reviews of Interventions
- It's an innovative topic in the field of bladder cancer.
- Actual problem because the incidence of bladder cancer is rising.

### Limitations

- Possible paucity of studies meeting the inclusion criteria.

## BACKGROUND

### Description of the condition

Bladder cancer (BC) is the 11<sup>th</sup> most common cancer worldwide. When both genders are considered separately, BC in men is rising to the 7<sup>th</sup> place whilst BC in women is dropping to the 17<sup>th</sup> place of most common cancer worldwide<sup>1,2</sup>. Besides the fact that BC is more common in men than in women, BC is also known as a disease of the elderly. Due to the growth of an aging population, it can be expected that the incidence of BC will rise in the near future<sup>3,4</sup>. Thirty percent of the patients diagnosed with BC present with muscle invasive BC (MIBC, stages T2-T4)<sup>5</sup>. Also, depending on risk stratification, up to 45% of patients with non-muscle invasive bladder cancer (NMIBC) will progress to MIBC<sup>6</sup>. The standard treatment in MIBC is neo-adjuvant chemotherapy followed by radical cystectomy (bladder removal), extended pelvic lymph node dissection and urinary diversion (continent or incontinent bladder replacement). Also patients with high-risk NMIBC are offered a radical cystectomy.<sup>1</sup> These are major interventions associated with a variety of negative side effects, especially on the urinary, gastro-intestinal and sexual function. This can lead to a loss of health-related quality of life (HRQoL), which refers to the patients' own perceptions of their health and ability to function<sup>7</sup> encompassing physical, psychological, social, and spiritual dimensions<sup>8</sup>. Combined radiochemotherapy is an alternative for radical cystectomy in order to preserve the bladder. Both radiotherapy and chemotherapy can also be used in the adjuvant or palliative setting and can also cause a variety of treatment related side effects. Therefore, follow-up care beyond the acute diagnosis and treatment phase is necessary<sup>9</sup>.

### Description of the intervention

The World Health Organisation (WHO) has defined rehabilitation as "the use of all means aimed at reducing the impact of disabling and handicapping conditions at enabling people with disabilities to achieve optimal social integration"<sup>10</sup>. A more specific definition of rehabilitation in the setting of cancer is the following: "cancer rehabilitation is a concept that is defined by the patient and involves helping a person with cancer to obtain maximum physical, social, psychological, and vocational functioning within the limit by the disease and its treatment"<sup>11</sup>. Therefore, cancer rehabilitation needs to comprise different intervention approaches<sup>12,13</sup>.

Physical activity (PA) is seen as one of the rehabilitation interventions to improve patients quality of life (QoL) and survival outcomes. PA is defined as "any movement created by the skeletal muscles that causes a substantial increase in energy expenditure"<sup>14</sup>. It is important that the terms 'physical activity' and 'exercise' are not mixed with each other. PA can be seen as an overarching term that includes exercise as well as other activities which involve bodily movement and are done as part of playing, working, active transportation, house chores and recreational activities. Exercise on the other hand, is a subcategory of PA. It is planned, structured, repetitive and purposeful to improve or maintain one or more

1  
2  
3 components of physical fitness (cardiorespiratory fitness, muscular strength, muscular  
4 endurance, flexibility and body composition)<sup>15</sup>. These components represent important  
5 outcomes in cancer survivors that may mediate the influence of exercise on other  
6 outcomes<sup>14</sup>.  
7

8  
9 Psychosocial interventions are another important focus in rehabilitation. These sort of  
10 interventions aim to help patients cope with negative side effects of cancer diagnosis and  
11 treatment<sup>16</sup>. Based on a framework proposed by Buffart et al., there are five categories of  
12 interventions: patient education, social support, coping skills training, psychotherapy and  
13 spiritual/existential therapy<sup>17</sup>.  
14  
15

### 16 **How the intervention might work**

17  
18 In order to explain how cancer rehabilitation interventions might work, the revised Wilson  
19 and Cleary Model for HRQoL will be used as a conceptual framework<sup>18</sup>. This is useful to  
20 explain the pathways between different patient outcomes<sup>19</sup>. The model proposes five types  
21 of patient outcome measurements (biological function, symptoms, functional status, health  
22 perception and overall QOL), which have a causal relationship<sup>18 20</sup>. These five patient  
23 outcome measurements can be influenced by individual and environment characteristics.  
24  
25

26  
27 In the context of bladder cancer, morbidity associated with the disease and its treatment  
28 can lead to complications related to urinary diversion, fatigue, urinary incontinence or  
29 constipation, sexual dysfunction<sup>21</sup> and psychological distress<sup>22</sup>. This can potentially lead to a  
30 loss of physical, social, psychological and role function, which affects activities in daily life. As  
31 a consequence, the general health perceptions of the patient can be damaged which can  
32 finally lead to an overall impaired QOL. All of these outcomes can be influenced by  
33 environment and individual characteristics.  
34  
35

36  
37 The provision of cancer rehabilitation can be seen as a physical environment  
38 characteristic. Since it has been proven in other cancer populations that cancer  
39 rehabilitation interventions have a positive influence on for example physical fitness<sup>23</sup>,  
40 muscle capacity<sup>24</sup>, fatigue and emotional distress<sup>25</sup>, we can conclude, according to the  
41 revised Wilson and Cleary Model for HRQoL, that cancer rehabilitation interventions can  
42 have a positive influence on other patient outcomes such as HRQoL<sup>18</sup>.  
43  
44

45  
46 Individual characteristics, such as age and the associated increased risk of co morbidities, are  
47 important factors to take into account in bladder cancer patients. These characteristics are  
48 associated with poorer health<sup>26</sup> such as functional and psychosocial declines<sup>27</sup>. Although this  
49 supports the need for cancer rehabilitation, the older age of bladder cancer patients creates  
50 challenges in recommending rehabilitation interventions. Potential difficulties are the lack of  
51 social support in older patients and the need for extra time and resources to enroll these  
52 patients<sup>28</sup>. Additionally, the high prevalence of urinary complications and problems with  
53 body image in bladder cancer patients can act as potential barriers to participate in exercise  
54 interventions<sup>26</sup>. According to Karvinen et al., exercise interventions aimed at bladder cancer  
55  
56  
57  
58  
59

1  
2  
3 survivors should focus on offering enjoyable activities, education on the benefits of regular  
4 exercise, enhancing activity levels in important others and targeting perceived barriers. They  
5 also note that adjuvant therapy, age and invasiveness of the tumor may affect exercise  
6 participation<sup>26</sup>. Furthermore, bladder cancer survivors seem to be most interested in walking  
7 and home-based, individual exercises that are not supervised<sup>29</sup>.  
8  
9

## 10 **Why it is important to do this review**

11  
12 With an increasing number of cancer survivors, cancer rehabilitation will become imperative  
13 in cancer survivorship. In order to develop evidence-based rehabilitation programs for  
14 patients with MIBC, it is essential to have a global picture of effective rehabilitation  
15 interventions. Therefore, a systematic review assessing the effects of exercise-based and  
16 psychosocial rehabilitation interventions for BC patients is needed. A previous systematic  
17 review assessed the effects of lifestyle factors (diet, smoking and physical activity) on HRQoL  
18 in bladder cancer survivors. Findings of this review concluded that there was limited  
19 evidence to support a positive association between HRQoL and physical activity in bladder  
20 cancer survivors<sup>30</sup>. Our review differs with previous review in several aspects. First we want  
21 to identify well defined interventions that are effective. In previous review, they evaluated  
22 the physical activity pattern of the patient, which is not the same as an exercise intervention.  
23 Furthermore, this review will not only focus on HRQoL, we will also assess the effects of  
24 rehabilitation interventions on other outcomes (explained below). Additionally, to our  
25 knowledge, there is no systematic review that has summarized the evidence of psychosocial  
26 rehabilitation interventions for MIBC survivors in a systematic manner.  
27  
28  
29  
30  
31

32  
33 So far, no specific guidelines exist for exercise-based and/or psychosocial rehabilitation  
34 interventions for MIBC survivors. This review could give guidance to the development of  
35 specific evidence-based guidelines. Although this review focuses only on the exercise and  
36 psychosocial part of rehabilitation, it is important to note that rehabilitation of cancer  
37 patients requires also other interventions such as diet counseling, smoking cessation, etc.<sup>12</sup>.  
38  
39

40 It should also be noticed that the provision of cancer rehabilitation is an often-neglected  
41 facet of cancer care in terms of health policy and infrastructure<sup>31</sup>. Frequently reported  
42 barriers to rehabilitation interventions are the lack of expertise, inappropriate referrals by  
43 physicians, funding issues<sup>24 31</sup> and availability of rehabilitation resources<sup>32</sup>. The results of this  
44 review may increase the awareness of physicians and funders of the importance of cancer  
45 rehabilitation.  
46  
47  
48

## 49 **AIMS AND OBJECTIVES**

### 50 **Primary objective**

51  
52  
53 1. Assessing the effects of rehabilitation interventions (exercise-based and psychosocial  
54 interventions) on patient reported outcomes (PROs) (e.g. QoL, fatigue, pain) and physical  
55 fitness of MIBC survivors.  
56  
57  
58  
59

## Secondary objective

1. Identifying significant moderators of intervention effects.

## METHODS

The overall approach of this review is consistent with the methodology described in the Cochrane Handbook for Systematic reviews of Interventions<sup>33</sup> and is described below. Reports of current systematic review protocol adhere to the preferred items for systematic reviews and meta-analysis protocol (PRISMA-P) checklist<sup>34</sup>. The systematic review itself will adhere to the Preferred Reporting Items for Systematic Reviews and Meta-Analyses (PRISMA)<sup>35</sup>.

### Criteria for considering studies for this review

#### Types of studies

Because of the anticipated low amount of randomized controlled trials (RCTs), RCTs and non-randomized studies (NRS) (i.e., cohort studies, case-control studies, cross-sectional studies and quasi-randomized controlled clinical trials (CCTs)) will be considered as appropriate study designs. Results from RCTs and NRS will be presented separately.

#### Types of participants

The population of interest will be adults ( $\geq 18$  years of age) with medically confirmed diagnosis of localized MIBC or high risk non-muscle invasive bladder cancer (NMIBC) for whom a radical cystectomy is indicated. Studies with a majority of patients with metastasized BC will be excluded. Demographic factors are no exclusion criteria except for age ( $< 18$  years of age). Studies involving participants with a range of cancers or other diagnoses that report results specifically for patients with MIBC will be included. Studies involving participants with urologic cancers where data is not provided separately for MIBC patients will be excluded.

#### Types of interventions

Exercise-based rehabilitation interventions considered for this review will be aerobic or endurance activities, strength or resistance training, balance exercises, flexibility exercises (with inclusion of yoga and Pilates), exercises specific to address sexual functioning and pelvic floor exercises in case of bladder preserving strategies or bladder reconstruction after radical cystectomy. Generalized advice to engage in regular PA activity will not be considered as an exercise-based rehabilitation intervention. In this review, the focus will be placed on exercise in a planned, structured, repetitive and purposeful rehabilitation intervention. PA as part of playing, working, active transportation, house chores or recreational activities will not be included.



1  
2  
3 Psychosocial rehabilitation interventions eligible for inclusion will be based on the  
4 framework proposed by Buffart et al.: patient education (e.g. stoma management,  
5 generalized advice to engage in PA activity), social support, coping skills training,  
6 psychotherapy and spiritual/existential therapy<sup>17</sup>. Alternative medicine and therapies will  
7 not be included in this review.  
8  
9

10 Both intervention types can either be individual or in group, hospital-based or home-based  
11 (with follow up by a professional), supervised by a physiotherapist or not and can be given  
12 before, during and/or after treatment. No limits will be placed on the timing, frequency,  
13 intensity and duration of rehabilitation interventions. The interventions will be compared  
14 with an inactive control intervention (e.g. no treatment, standard care or a waiting list  
15 control).  
16  
17

### 18 Types of outcome measures

19 For both primary and secondary outcome measures, there will be no exclusion based on  
20 length of follow up.  
21  
22

#### 23 *Primary outcomes*

- 24  
25  
26 1. PROs including overall HRQoL, specific HRQoL domains including symptoms such as  
27 fatigue, pain, urinary incontinence, sexual dysfunction, gastro-intestinal dysfunction and  
28 psychological factors such as anxiety, depression, stress and self-esteem. Due to the wide  
29 range of questionnaires used for PROs and the non-consensus of using one standardized  
30 questionnaire, only studies using the standardized and validated measurement instruments  
31 for PRO, found in Table 1<sup>36 48</sup> will be included. All studies using other measurement  
32 instruments will be excluded, unless proof of their validation can be found in literature.  
33  
34  
35  
36 2. Physical fitness assessed by VO<sub>2</sub> peak, VO<sub>2</sub> max, 6- or 12-minute walk test, 400-m walk  
37 test, handgrip strength tests, sit and reach tests or other proven to be validated instruments.  
38  
39

#### 40 *Secondary outcomes*

- 41  
42 1. Cancer recurrence, cancer-specific survival, progression-free survival, overall survival,  
43 mortality, years of life lost or 5-year survival.  
44  
45 2. Body composition assessed by height, weight, body mass index, muscle capacity, fat mass,  
46 lean body mass, thickness of skin folds, body fat, arm circumference, waist circumference,  
47 hip circumference or waist-hip ratio.  
48  
49 3. Bone mineral density or fracture risk assessed by fracture risk assessment tool (FRAX)<sup>49</sup>.  
50  
51 4. Karnofsky performance score (KPS)<sup>50</sup>.  
52  
53  
54  
55  
56  
57  
58  
59  
60

**Table 1 – standardized and validated measurement instruments for the included PROs**

| <b>Patient reported outcome</b>    | <b>Validated measurement instrument</b>                                                                                                                                                                                       |
|------------------------------------|-------------------------------------------------------------------------------------------------------------------------------------------------------------------------------------------------------------------------------|
| <b>HRQOL</b>                       | EQ-5D visual analogue scale, MID: 7 points, SF-36, Ferrans and Powers Quality of Life Index, World Health Organization Quality of Life, SF-12, Padilla QLI, 20-item short form health survey and Satisfaction With Life Scale |
| <b>Cancer specific QOL</b>         | FACT-G, EORTC QLQ-C30, Functional Living Index-Cancer, Selby's QLI, Cleary's QLI and Cancer Rehabilitation Evaluation System –SF                                                                                              |
| <b>Bladder cancer specific QOL</b> | QLQ-BLM30, BCI and FACT-BI                                                                                                                                                                                                    |
| <b>Sexual function</b>             | IIEF-5 and FSFI                                                                                                                                                                                                               |
| <b>Gastro-intestinal function</b>  | GIQLI                                                                                                                                                                                                                         |
| <b>Urinary incontinence</b>        | BCI supplement, ICIQ-UI SF, IPSS                                                                                                                                                                                              |
| <b>Psychological factors</b>       |                                                                                                                                                                                                                               |
| <b>Depression</b>                  | BSI-18, BDI,ISR-depression scale                                                                                                                                                                                              |
| <b>Anxiety</b>                     | STAI anxiety scales, numeric rating scales or visual analogue scale                                                                                                                                                           |
| <b>Stress</b>                      | Perceived Stress Scale                                                                                                                                                                                                        |
| <b>Self-esteem</b>                 | Rosenberg self-esteem scale                                                                                                                                                                                                   |

### Search methods for identification of studies

#### Electronic searches

The following electronic databases will be searched from inception until the search date: the Cochrane Central Register of Controlled Trials (CENTRAL), MEDLINE (using the PubMed interface), Embase (using the embase.com interface), Web of Science and the Physiotherapy Evidence Database (PEDro). The search strategies will be evaluated using the PRESS checklist<sup>51</sup> and will be monitored and peer reviewed by an information specialist (NSP). The search strategies are presented in 'Supplementary File 1'.

#### Searching other resources

The cited and citing references of the included studies will be checked via Web of Science.

### Data collection and analysis

#### Selection of studies

All references found through the search process will be downloaded in a database created by reference management software (Endnote). After removing duplicates in Endnote, all references will be imported into Covidence for screening purposes. Obviously irrelevant

1  
2  
3 studies, based on title and abstract, will independently be excluded by two review authors  
4 (ER and VF). After screening titles and abstracts, two review authors (ER and VF) will  
5 independently assess full-text reports for eligibility. Discrepancies will be discussed with a  
6 third review author (NS). Reasons for exclusion of full-texts will be documented. Studies will  
7 be excluded if no full-text is available. Abstracts in any other language than English will be  
8 excluded. There will be no language restriction for full texts and translations will be carried  
9 out if necessary. If studies have multiple publications with the same outcome(s) reported,  
10 manuscripts with the longest follow-up will be selected for inclusion. Older publications  
11 referred to in included articles will be accessed to clarify methods if required.  
12  
13  
14

### 15 Data extraction

16  
17 A modified EPOC data collection form of the Cochrane collaboration will be used and pilot  
18 tested with at least three studies in the review<sup>52</sup>. After pilot testing the form, adjustments  
19 can be made. Data extraction will be performed independently by two review authors (ER  
20 and VF). At least following data will be extracted for each study:  
21  
22

- 23 • **General information:** date form completed, name of person extracting data, report  
24 title, report ID, authors' names, source, country, contact address, language of  
25 publication, year of publication.
- 26 • **Population and setting:** population description (from which study participants are  
27 drawn), setting (e.g. inpatient, outpatient, hospital setting, home setting,  
28 combination), inclusion and exclusion criteria.
- 29 • **Methods:** aim of study, design, unit of allocation, start and end date, duration of  
30 participation.
- 31 • **Participants:** number of participants in intervention and control groups, details of  
32 clusters if applicable, baseline imbalances, participant demographics such as sex and  
33 age, disease related characteristics such as stage of disease, received treatment(s)  
34 and comorbidities.
- 35 • **Intervention:** type of intervention (exercise-based, psychosocial or combination),  
36 details of intervention type (e.g. aerobic, pelvic floor exercises, counseling, patient  
37 education), co-intervention(s), type of control intervention, frequency, duration and  
38 providers of the intervention.
- 39 • **Outcomes:** outcome name, time points measured and reported, outcome definition,  
40 person measuring/reporting, upper and lower limits of scales, unit measurement if  
41 relevant, if outcome/tool is validated, imputation of missing data and assumed risk  
42 estimate if reported.
- 43 • **Results:** outcome, measurement effects (please see data analyses below) for  
44 intervention and comparison group, baseline data, number of missing participants  
45 and reasons, and statistical methods used.  
46  
47  
48  
49  
50  
51  
52  
53  
54  
55  
56  
57  
58  
59  
60

### Assessment of risk of bias in included studies

The Cochrane Collaboration's tool for assessing risk of bias will be used for RCTs. Assessment of risk of bias in NRS will be done using the Newcastle-Ottawa Scale for observational studies. The assessment of risk of bias will be done independently by two reviewers (ER and NSP). Differences will be discussed and a third reviewer (NS) will be consulted when needed. Results will be summarized both in a graph and a narrative summary. In order to evaluate selective reporting, the reviewers will check clinical trial registries or search any protocols of the studies for a priori reported primary and secondary outcome measures. The strength of the body of evidence will be assessed according to the GRADE approach.

### Dealing with missing data

If essential data is not available in the publication, we will first attempt to contact the study authors. If this is not possible, we will try to back-calculate from the data presented. If data will be obtained from other study authors, this will be reported in the review in a transparent manner. This way, we can keep in mind that this missing data obtained from study authors was not peer reviewed. Studies assessing lifestyle interventions may have issues with compliance. Therefore, reasons for missing data (e.g. dropouts, losses to follow-up and withdrawals) will be carefully reported.

### Assessment of heterogeneity

First, there will be a critical consideration of the heterogeneity between the different interventions and outcomes to evaluate whether there is clinical diversity or not. Based on this evaluation, there will be a decision if a meta-analysis can be conducted. When there's no clinical heterogeneity, statistical heterogeneity will be quantified using the  $I^2$  statistic. We will consider the statistical heterogeneity to be high if  $I^2 > 50\%$ . Depending on the heterogeneity of the studies and their results, we will further decide if a meta-analysis can be conducted. We will attempt to explain any observed heterogeneity in the review.

### Assessment of reporting bias

Funnel plots will be used to assess publication bias when ten or more studies are included in a meta-analysis.

### Data synthesis

The findings from the included studies will be summarized descriptively. For dichotomous outcomes, measurement of treatment effect will be reported as risk ratios (RRs) and 95% confidence intervals (CIs). For continuous outcomes, we will calculate mean differences and 95% CIs when results are reported on the same scale (or can be converted to the same scale) or standardized mean differences and 95% CIs if results are reported on different scales.

1  
2  
3 There will be an attempt to identify significant moderators, based on the most important  
4 demographical and clinical characteristics in this population. In order to do this, there will be  
5 a subgroup analysis for age and urinary diversion type. To prevent co-intervention bias,  
6 there will also be a subgroup analysis based on the type of intervention (only exercised-  
7 based interventions, only psychosocial interventions or a combination).  
8  
9

10 When homogeneity of the studies is sufficient, random-effects meta-analysis will be  
11 undertaken separately for each type of study design. Only studies with low risk of bias will be  
12 included in meta-analyses. Therefore, we will perform sensitivity analyses to investigate how  
13 conclusions might be affected if studies at high or unclear risk of bias were included.  
14  
15

## 16 **Ethics and dissemination**

17  
18 Ethics approval is not required, as no primary data will be collected. Results will be  
19 disseminated through a peer-reviewed publication.  
20  
21

## 22 **Discussion**

23  
24 The scope of this review is broad (i.e., different rehabilitation interventions and study  
25 designs). Although this means that heterogeneity might be present between the studies,  
26 evaluation of different intervention approaches is needed to develop optimal rehabilitation  
27 or survivorship programs. Caution will be present in the interpretation of the results because  
28 of the fact that evidence from RCTs is higher than evidence from NRS. Therefore, the results  
29 derived from RCTs will be seen as the primary evidence. Results from NRS will be seen as  
30 additional evidence to support the results from RCTs.  
31  
32  
33

34 This systematic review has several strengths. First, the overall approach of this review is  
35 consistent with the methodology described in the Cochrane Handbook for Systematic  
36 reviews of Interventions. Secondly, rehabilitation interventions are an innovative topic in the  
37 field of bladder cancer so this review ensures an absolute value. A third strength is the fact  
38 that MIBC is an actual problem because of the potentially rising incidence of MIBC due to the  
39 aging population.  
40  
41  
42

43 The results of this systematic review could also have potential limitations in terms of biased  
44 results due to the nature of exercise and psychosocial interventions. It is impossible for such  
45 interventions to blind participants and personnel. Therefore, 'blinding of participants and  
46 personnel' will not be taken into account in the risk of bias assessment because of the  
47 thought that this will not necessarily affect the study quality. On the other hand, attrition  
48 and adherence biases and selective reporting biases are other common concerns around  
49 high risk of bias that would affect the study quality<sup>53</sup>. Therefore, it's important that the risk  
50 of bias assessment will be carried out very carefully. Another limitation of this review could  
51 be the possible paucity of studies meeting the inclusion criteria.  
52  
53  
54  
55  
56  
57  
58  
59  
60

1  
2  
3 In spite of these anticipated limitations, it's important to conduct this review because of the  
4 expected implications for health care, research and survivorship. To date, there are no  
5 specific guidelines for exercise-based or psychosocial rehabilitation interventions for MIBC  
6 survivors. This systematic review is expected to provide guidance to the development of  
7 specific guidelines and evidence-based rehabilitation or survivorship programs for MIBC  
8 survivors. Development of such programs could have further implications for health care if  
9 they will be translated into daily clinical practice.  
10  
11

12  
13 By identifying those interventions that have a positive effect on patient outcomes and which  
14 underlying factors ensure the success of such rehabilitation interventions, new interventions  
15 can be developed that can contribute to further research. The positive influence of physical  
16 activity on survivorship is already suggested in different tumor types<sup>54</sup>. The results of this  
17 systematic review can contribute to patient survivorship from the hypothesis that this  
18 positive association is also applicable in MIBC.  
19  
20

#### 21 **Authors' contribution**

22  
23 ER drafted the manuscript and developed the methods and analyses strategy. VF coordinated the process. NSP  
24 and NS aided in developing the search strategy. VF, PO and KD provided uro-oncology specific expertise. RB and  
25 BD gave valuable input concerning rehabilitation.  
26

#### 27 **Funding statement**

28  
29 This study is funded by a grant of *Kom op tegen Kanker*. The granting bodies are not involved in data collection  
30 or analysis.  
31

#### 32 **Competing interests statement**

33  
34 None declared.  
35  
36  
37  
38  
39  
40  
41  
42  
43  
44  
45  
46  
47  
48  
49  
50  
51  
52  
53  
54  
55  
56  
57  
58  
59  
60

## REFERENCES

1. Witjes JA, Compérat E, Cowan NC, et al. EAU Guidelines 2016: Muscle invasive and metastatic bladder cancer. Available from: <https://uroweb.org/guideline/bladder-cancer-muscle-invasive-and-metastatic/>, accessed on 12/10/2016.
2. Burger M, Catto JW, Dalbagni G, et al. Epidemiology and risk factors of urothelial bladder cancer. *European urology* 2013;**63**(2):234-41.
3. Malats N, Real FX. Epidemiology of bladder cancer. *Hematology/oncology clinics of North America* 2015;**29**(2):177-89, vii.
4. Shahrokh FS, Milowsky M, Droller MJ. Bladder cancer in the elderly. *Urologic Oncology: Seminars and Original Investigations* 2009;**27**(6):653-67.
5. Stenzl A, Witjes J, Compérat E, et al. Bladder Cancer Muscle-invasive and Metastatic. UPDATE 2012.
6. van Rhijn BW, Burger M, Lotan Y, et al. Recurrence and progression of disease in non-muscle-invasive bladder cancer: from epidemiology to treatment strategy. *European urology* 2009;**56**(3):430-42.
7. Wright JL, Porter MP. Quality-of-life assessment in patients with bladder cancer. *Nature clinical practice Urology* 2007;**4**(3):147-54.
8. Mohamed N, Gilbert F, Lee C, et al. Pursuing Quality in the Application of Bladder Cancer Quality of Life Research. *Bladder Cancer* 2016;**2**(2):139-49.
9. National Cancer Institute: division of cancer control & population sciences. Available from: <https://cancercontrolcancer.gov/ocs/statistics/definitionshtml>, accessed on 11/10/2016 2016.
10. Hojan K. Contemporary rehabilitation at cancer centres. *Journal of Medical Science* 2016;**83**(2):156-60.
11. Gudbergsson SB, Dahl AA, Loge JH, et al. What is covered by “cancer rehabilitation” in PubMed? A review of randomized controlled trials 1990–2011. *Journal of rehabilitation medicine* 2015;**47**(2):97-106.
12. Weis J, Giesler JM. Rehabilitation for cancer patients. *Psycho-Oncology* 2014:87-101.
13. Harrison JD, Young JM, Price MA, et al. What are the unmet supportive care needs of people with cancer? A systematic review. *Supportive Care in Cancer* 2009;**17**(8):1117-28.
14. McGowan EL, Courneya KS. Exercise interventions in supportive oncology. 2011.
15. World Health Organisation: Global Strategy On Diet, Physical Activity and Health. Available from: <http://www.who.int/dietphysicalactivity/pa/en/>, accessed on 11/10/2016.
16. Parahoo K, McDonough S, McCaughan E, et al. Psychosocial interventions for men with prostate cancer. *The Cochrane Library* 2013.
17. Buffart LM, Kalter J, Chinapaw MJ, et al. Predicting Optimal Cancer Rehabilitation and Supportive care (POLARIS): rationale and design for meta-analyses of individual patient data of randomized controlled trials that evaluate the effect of physical activity and psychosocial interventions on health-related quality of life in cancer survivors. *Systematic reviews* 2013;**2**(1):1.
18. Ferrans CE, Zerwic JJ, Wilbur JE, et al. Conceptual model of health-related quality of life. *Journal of Nursing Scholarship* 2005;**37**(4):336-42.
19. Saban KL, Penckofer SM, Androwich I, et al. Health-related quality of life of patients following selected types of lumbar spinal surgery: A pilot study. *Health and Quality of Life Outcomes* 2007;**5**(1):71.
20. Hacker E. Exercise and quality of life: strengthening the connections. *Clinical journal of oncology nursing* 2009;**13**(1):31.
21. Jensen BT, Jensen JB, Laustsen S, et al. Multidisciplinary rehabilitation can impact on health-related quality of life outcome in radical cystectomy: Secondary reported outcome of a randomized controlled trial. *Journal of multidisciplinary healthcare* 2014;**7**:301-11.

22. Palapattu GS, Haisfield-Wolfe ME, Walker JM, et al. Assessment of perioperative psychological distress in patients undergoing radical cystectomy for bladder cancer. *The Journal of urology* 2004;**172**(5):1814-17.
23. Buffart LM, Kalter J, Sweegers MG, et al. Effects and moderators of exercise on quality of life and physical function in patients with cancer: an individual patient data meta-analysis of 34 RCTs. *Cancer Treatment Reviews* 2016.
24. Alfano CM, Ganz PA, Rowland JH, et al. Cancer survivorship and cancer rehabilitation: revitalizing the link. *Journal of Clinical Oncology* 2012;**30**(9):904-06.
25. Andersen BL. Biobehavioral outcomes following psychological interventions for cancer patients. *Journal of consulting and clinical psychology* 2002;**70**(3):590.
26. Karvinen KH, Courneya KS, Plotnikoff RC, et al. A prospective study of the determinants of exercise in bladder cancer survivors using the theory of planned behavior. *Supportive Care in Cancer* 2009;**17**(2):171.
27. Brown JC, Winters-Stone K, Lee A, et al. Cancer, physical activity, and exercise. *Comprehensive Physiology* 2012.
28. Grabowski JP, Pintus D, Ramesh HS, et al. The Challenges of Treating Cancer in Older Patients—How Effective Are Clinical Trials in Developing Unique Treatments? performance evaluation 2008;**5**:28.
29. Karvinen KH, Courneya KS, Venner P, et al. Exercise programming and counseling preferences in bladder cancer survivors: a population-based study. *Journal of cancer survivorship: research and practice* 2007;**1**(1):27-34.
30. Gopalakrishna A, Longo TA, Fantony JJ, et al. Lifestyle factors and health-related quality of life in bladder cancer survivors: a systematic review. *Journal of Cancer Survivorship* 2016;**10**(5):874-82.
31. Pearson EJ, Twigg VJ. A framework for rehabilitation for cancer survivors. *European journal of cancer care* 2013;**22**(6):701-08.
32. Bultijnck R, Surcel C, Ploussard G, et al. Practice Patterns Compared with Evidence-based Strategies for the Management of Androgen Deprivation Therapy–Induced Side Effects in Prostate Cancer Patients: Results of a European Web-based Survey. *European Urology Focus* 2016.
33. Higgins JPT, (editors) GS. *Cochrane Handbook for Systematic Reviews of Interventions* Version 5.1.0 [updated March 2011]. The Cochrane Collaboration, 2011:Available from [www.handbook.cochrane.org](http://www.handbook.cochrane.org).
34. Shamseer L, Moher D, Clarke M, et al. Preferred reporting items for systematic review and meta-analysis protocols (PRISMA-P) 2015: elaboration and explanation. *Bmj* 2015;**349**:g7647.
35. Moher D, Liberati A, Tetzlaff J, et al. Preferred reporting items for systematic reviews and meta-analyses: the PRISMA statement. *Bmj* 2009;**339**:b2535.
36. Measuring health-related quality of life in men with prostate cancer: A systematic review of the most used questionnaires and their validity. *Urologic Oncology: Seminars and Original Investigations*; 2015. Elsevier.
37. Danna BJ, Metcalfe MJ, Wood EL, et al. Assessing Symptom Burden in Bladder Cancer: An Overview of Bladder Cancer Specific Health-Related Quality of Life Instruments. *Bladder Cancer* 2016;**2**(3):329-40.
38. Vodermaier A, Linden W, Siu C. Screening for emotional distress in cancer patients: a systematic review of assessment instruments. *Journal of the National Cancer Institute* 2009;**101**(21):1464-88.
39. Brandt WA, Loew T, von Heymann F, et al. How does the ICD-10 symptom rating (ISR) with four items assess depression compared to the BDI-II? A validation study. *Journal of affective disorders* 2015;**173**:143-45.
40. Hornblow A, Kidson M-A. The visual analogue scale for anxiety: a validation study. *Australian and New Zealand Journal of Psychiatry* 1976;**10**(4):339-41.



- 1
- 2
- 3 41. Araujo IB, Castelani A, Soler T, et al. Stress assessment in the elderly by the Perceived Stress Scale (PSS). *INTERNATIONAL PSYCHOGERIATRICS* 2015;**27**:S119-S19.
- 4
- 5 42. Li C-C, Chen M-L, Chang T-C, et al. Social support buffers the effect of self-esteem on quality of
- 6 life of early-stage cervical cancer survivors in Taiwan. *European Journal of Oncology Nursing*
- 7 2015;**19**(5):486-94.
- 8 43. Gilbert SM, Dunn RL, Hollenbeck BK, et al. Development and validation of the Bladder Cancer
- 9 Index: a comprehensive, disease specific measure of health related quality of life in patients
- 10 with localized bladder cancer. *The Journal of urology* 2010;**183**(5):1764-70.
- 11 44. Dargis L, Trudel G, Cadieux J, et al. Validation of the International Index of Erectile Function (IIEF)
- 12 and presentation of norms in older men. *Sexologies* 2013;**22**(1):e20-e26.
- 13 45. Baser RE, Li Y, Carter J. Psychometric validation of the Female Sexual Function Index (FSFI) in
- 14 cancer survivors. *Cancer* 2012;**118**(18):4606-18.
- 15 46. Eypasch E, Williams J, Wood-Dauphinee S, et al. Gastrointestinal Quality of Life Index:
- 16 development, validation and application of a new instrument. *British Journal of Surgery*
- 17 1995;**82**(2):216-22.
- 18 47. Hajebrahimi S, Nourizadeh D, Hamedani R, et al. Validity and reliability of the International
- 19 Consultation on Incontinence Questionnaire-Urinary Incontinence Short Form and its
- 20 correlation with urodynamic findings. *Urology journal* 2012;**9**(4):685.
- 21 48. Gray M. Psychometric evaluation of the international prostate symptom score. *Urologic nursing*
- 22 1998;**18**(3):175.
- 23 49. Watts NB, Lewiecki EM, Miller PD, et al. National Osteoporosis Foundation 2008 Clinician's Guide
- 24 to Prevention and Treatment of Osteoporosis and the World Health Organization Fracture
- 25 Risk Assessment Tool (FRAX): what they mean to the bone densitometrist and bone
- 26 technologist. *Journal of Clinical Densitometry* 2008;**11**(4):473-77.
- 27 50. Mor V, Laliberte L, Morris JN, et al. The Karnofsky performance status scale: an examination of its
- 28 reliability and validity in a research setting. *Cancer* 1984;**53**(9):2002-07.
- 29 51. McGowan J, Sampson M, Salzwedel DM, et al. PRESS Peer Review of Electronic Search Strategies:
- 30 2015 Guideline Statement. *Journal of clinical epidemiology* 2016.
- 31 52. Effective Practice and Organisation of Care (EPOC). EPOC Resources for review authors. Oslo:
- 32 Norwegian Knowledge Centre for the Health Services; 2015. Secondary Effective Practice and
- 33 Organisation of Care (EPOC). EPOC Resources for review authors. Oslo: Norwegian
- 34 Knowledge Centre for the Health Services; 2015. [http://epoc.cochrane.org/epoc-specific-](http://epoc.cochrane.org/epoc-specific-resources-review-authors)
- 35 [resources-review-authors](http://epoc.cochrane.org/epoc-specific-resources-review-authors).
- 36 53. Bourke L, Smith D, Steed L, et al. Exercise for men with prostate cancer: a systematic review and
- 37 meta-analysis. *European urology* 2016;**69**(4):693-703.
- 38 54. Ammitzboll G, Sogaard K, Karlsen RV, et al. Physical activity and survival in breast cancer.
- 39 *European journal of cancer (Oxford, England : 1990)* 2016;**66**:67-74.
- 40
- 41
- 42
- 43
- 44
- 45
- 46
- 47
- 48
- 49
- 50
- 51
- 52
- 53
- 54
- 55
- 56
- 57
- 58
- 59
- 60

1  
2  
3  
4  
5  
6  
7  
8  
9  
10  
11  
12  
13  
14  
15  
16  
17  
18  
19  
20  
21  
22  
23  
24  
25  
26  
27  
28  
29  
30  
31  
32  
33  
34  
35  
36  
37  
38  
39  
40  
41  
42  
43  
44  
45  
46  
47

| Search Strategy                                              |                    |                                                                                                                                                                                                                                                                                                                                                                                                                                                                                                                                                                                                                                                                                                                                                                                                                                                                                                                                                                                                                                                                                                                                                                                                                                                                                                                                                                                                                                                                                                                                                                                                                                                                                                                                                                                                                                                                                                                                                                                                                                                                                                                                                                                                                                                                                                                                                                                                                                                                                                                                                                                                                                                                                                                                                                                                                                                                                                                                                                                                                                                                                                                                                                                                                                                                                                                                                                                                                                                                                                                                                      |
|--------------------------------------------------------------|--------------------|------------------------------------------------------------------------------------------------------------------------------------------------------------------------------------------------------------------------------------------------------------------------------------------------------------------------------------------------------------------------------------------------------------------------------------------------------------------------------------------------------------------------------------------------------------------------------------------------------------------------------------------------------------------------------------------------------------------------------------------------------------------------------------------------------------------------------------------------------------------------------------------------------------------------------------------------------------------------------------------------------------------------------------------------------------------------------------------------------------------------------------------------------------------------------------------------------------------------------------------------------------------------------------------------------------------------------------------------------------------------------------------------------------------------------------------------------------------------------------------------------------------------------------------------------------------------------------------------------------------------------------------------------------------------------------------------------------------------------------------------------------------------------------------------------------------------------------------------------------------------------------------------------------------------------------------------------------------------------------------------------------------------------------------------------------------------------------------------------------------------------------------------------------------------------------------------------------------------------------------------------------------------------------------------------------------------------------------------------------------------------------------------------------------------------------------------------------------------------------------------------------------------------------------------------------------------------------------------------------------------------------------------------------------------------------------------------------------------------------------------------------------------------------------------------------------------------------------------------------------------------------------------------------------------------------------------------------------------------------------------------------------------------------------------------------------------------------------------------------------------------------------------------------------------------------------------------------------------------------------------------------------------------------------------------------------------------------------------------------------------------------------------------------------------------------------------------------------------------------------------------------------------------------------------------|
| Database                                                     | Data last searched | Search Syntax                                                                                                                                                                                                                                                                                                                                                                                                                                                                                                                                                                                                                                                                                                                                                                                                                                                                                                                                                                                                                                                                                                                                                                                                                                                                                                                                                                                                                                                                                                                                                                                                                                                                                                                                                                                                                                                                                                                                                                                                                                                                                                                                                                                                                                                                                                                                                                                                                                                                                                                                                                                                                                                                                                                                                                                                                                                                                                                                                                                                                                                                                                                                                                                                                                                                                                                                                                                                                                                                                                                                        |
| The Cochrane Central Register of Controlled Trials (CENTRAL) | 13/12/2016         | <ol style="list-style-type: none"> <li>[mh "Urinary Bladder Neoplasms"] OR [mh "Carcinoma, Transitional Cell"] OR ("bladder cancer"):ti,ab,kw OR ("bladder carcinoma"):ti,ab,kw OR ("bladder malignancy"):ti,ab,kw OR ("bladder neoplasm"):ti,ab,kw OR ("bladder tumor"):ti,ab,kw OR ("transitional cell carcinoma"):ti,ab,kw OR ("transitional cell cancer"):ti,ab,kw OR ("transitional cell malignancies"):ti,ab,kw OR ("transitional cell tumor"):ti,ab,kw OR ("urothelial cancer"):ti,ab,kw OR ("urothelial carcinoma"):ti,ab,kw OR ("urothelial malignancy"):ti,ab,kw OR ("urothelial tumor"):ti,ab,kw OR ("urinary tract carcinoma"):ti,ab,kw OR ("urinary tract cancer"):ti,ab,kw OR ("urinary tract malignancy"):ti,ab,kw OR ("urinary tract tumor"):ti,ab,kw</li> <li>[mh "exercise"] OR [mh "Exercise Movement Techniques"] OR [mh "Sports"] OR [mh "Physical Fitness"] OR [mh "Physical Exertion"] OR [mh "Exercise Therapy"] OR [mh "Dance Therapy"] OR [mh "Recreation Therapy"] OR [mh "Rehabilitation, Vocational"] OR [mh "Telerehabilitation"] OR [mh "Occupational Therapy"] OR [mh "Self Care"] OR [mh "Urinary Incontinence/rehabilitation"] OR [mh "Pelvic Floor/therapy"] OR ("self care"):ti,ab,kw OR (exercise):ti,ab,kw OR (sport):ti,ab,kw OR ("physical activity"):ti,ab,kw OR (physiotherapy):ti,ab,kw OR (kinesiotherapy):ti,ab,kw OR ("physical conditioning"):ti,ab,kw OR ("physical education"):ti,ab,kw OR ("physical fitness"):ti,ab,kw OR (running):ti,ab,kw OR (swimming):ti,ab,kw OR (walking):ti,ab,kw OR (jogging):ti,ab,kw OR ("weight lifting"):ti,ab,kw OR (dance):ti,ab,kw OR ("tai chi"):ti,ab,kw OR (yoga):ti,ab,kw OR (pilates):ti,ab,kw OR (gymnastic):ti,ab,kw OR ("resistance training"):ti,ab,kw OR ("aerobic training"):ti,ab,kw OR ("anaerobic training"):ti,ab,kw OR ("muscle training"):ti,ab,kw OR (stretching):ti,ab,kw OR (aerobic):ti,ab,kw OR (rehabilitation):ti,ab,kw OR ("prehabilitation"):ti,ab,kw OR (prehabilitation):ti,ab,kw OR (aquagym):ti,ab,kw OR (football):ti,ab,kw OR (soccer):ti,ab,kw OR ("circuit training"):ti,ab,kw OR (fitness):ti,ab,kw OR ("bladder training"):ti,ab,kw OR ("incontinence management"):ti,ab,kw OR ("urinary management"):ti,ab,kw</li> <li>[mh "Tertiary Prevention"] OR [mh "Social Support"] OR [mh "Psychiatric Rehabilitation"] OR [mh "Health Promotion"] OR [mh "Psychotherapy"] OR [mh "Counseling"] OR [mh "Patient Education as Topic"] OR [mh "Sex Education"] OR [mh "Sexuality/rehabilitation"] OR [mh "Health Literacy"] OR [mh "psychology/education"] OR [mh "psychology/therapy"] OR [mh "Problem Solving"] OR [mh "Mind-body therapies"] OR [mh "patient participation"] OR [mh "Existentialism"] OR [mh "spiritual therapies"] OR [mh "problem-based learning"] OR [mh "Sedentary Lifestyle"] OR ("psychosocial intervention"):ti,ab,kw OR ("psychologic intervention"):ti,ab,kw OR ("psychological intervention"):ti,ab,kw OR ("psychology intervention"):ti,ab,kw OR ("social intervention"):ti,ab,kw OR ("psychosocial therapy"):ti,ab,kw OR ("psychologic therapy"):ti,ab,kw OR ("psychological therapy"):ti,ab,kw OR ("psychology therapies"):ti,ab,kw OR (psychotherapy):ti,ab,kw OR ("tertiary health care"):ti,ab,kw OR ("tertiary prevention"):ti,ab,kw OR ("social support"):ti,ab,kw OR ("social behavior"):ti,ab,kw OR ("support care"):ti,ab,kw OR ("supportive care"):ti,ab,kw OR ("behavior treatment"):ti,ab,kw OR ("behavior therapy"):ti,ab,kw OR ("cognitive treatment"):ti,ab,kw OR ("cognitive</li> </ol> |

1  
2  
3  
4  
5  
6  
7  
8  
9  
10  
11  
12  
13  
14  
15  
16  
17  
18  
19  
20  
21  
22  
23  
24  
25  
26  
27  
28  
29  
30  
31  
32  
33  
34  
35  
36  
37  
38  
39  
40  
41  
42  
43  
44  
45  
46  
47

|                                       |                   |                                                                                                                                                                                                                                                                                                                                                                                                                                                                                                                                                                                                                                                                                                                                                                                                                                                                                                                                                                                                                                                                                                                                                                                                                                                                                                                                                                                                                                                                                                                                                                                                                                                                                                                                                                                                                                                                                                                                                                                                         |
|---------------------------------------|-------------------|---------------------------------------------------------------------------------------------------------------------------------------------------------------------------------------------------------------------------------------------------------------------------------------------------------------------------------------------------------------------------------------------------------------------------------------------------------------------------------------------------------------------------------------------------------------------------------------------------------------------------------------------------------------------------------------------------------------------------------------------------------------------------------------------------------------------------------------------------------------------------------------------------------------------------------------------------------------------------------------------------------------------------------------------------------------------------------------------------------------------------------------------------------------------------------------------------------------------------------------------------------------------------------------------------------------------------------------------------------------------------------------------------------------------------------------------------------------------------------------------------------------------------------------------------------------------------------------------------------------------------------------------------------------------------------------------------------------------------------------------------------------------------------------------------------------------------------------------------------------------------------------------------------------------------------------------------------------------------------------------------------|
|                                       |                   | <p>therapy"):ti,ab,kw OR (counseling):ti,ab,kw OR ("patient education"):ti,ab,kw OR ("patient participation"):ti,ab,kw OR ("health education"):ti,ab,kw OR ("sex education"):ti,ab,kw OR ("sexual education"):ti,ab,kw OR (psychoeducation):ti,ab,kw OR ("sex therapy"):ti,ab,kw OR ("sexual therapy"):ti,ab,kw OR ("stoma education"):ti,ab,kw OR ("stoma therapy"):ti,ab,kw OR ("health literacy"):ti,ab,kw OR ("health promotion"):ti,ab,kw OR ("health behavior"):ti,ab,kw OR ("cognitive behavior"):ti,ab,kw OR ("behavior training"):ti,ab,kw OR ("behavioral training"):ti,ab,kw OR (CBT) OR ("complementary therapy"):ti,ab,kw OR ("mind body therapy"):ti,ab,kw OR ("spiritual therapy"):ti,ab,kw OR ("relaxation therapy"):ti,ab,kw OR ("relaxation training"):ti,ab,kw OR ("client centered therapy"):ti,ab,kw OR (conditioning):ti,ab,kw OR ("stoma management"):ti,ab,kw OR ("bowel management"):ti,ab,kw OR (coping):ti,ab,kw OR (mindfulness):ti,ab,kw OR (empowerment):ti,ab,kw OR ("self-monitoring"):ti,ab,kw OR ("motivation therapy"):ti,ab,kw OR ("motivational therapy"):ti,ab,kw OR ("motivation interviewing"):ti,ab,kw OR ("motivational interviewing"):ti,ab,kw OR ("motivation treatment"):ti,ab,kw OR ("motivational treatment"):ti,ab,kw OR (psychology):ti,ab,kw OR ("problem solving"):ti,ab,kw OR ("psychosocial care"):ti,ab,kw OR ("psychological care"):ti,ab,kw OR ("psychologic care"):ti,ab,kw OR ("caregiver support"):ti,ab,kw OR (sociotherapy):ti,ab,kw OR ("occupational therapy"):ti,ab,kw OR ("care delivery"):ti,ab,kw OR ("functional therapy"):ti,ab,kw OR ("functional training"):ti,ab,kw OR (existentialism):ti,ab,kw OR ("spiritual healing"):ti,ab,kw OR ("spiritual therapy"):ti,ab,kw OR ("transcultural care"):ti,ab,kw OR ("life style"):ti,ab,kw</p> <p>4. 2 OR 3<br/>5. 1 AND 4</p>                                                                                                                                                          |
| <p>MEDLINE (via PubMed interface)</p> | <p>13/12/2016</p> | <p>1. "Urinary Bladder Neoplasms"[MESH] OR "Urinary Bladder/abnormalities"[MESH] OR "Urinary bladder/surgery"[MESH] OR "Carcinoma, Transitional Cell"[Mesh] OR "bladder cancer"[TIAB] OR "bladder cancers"[TIAB] OR "bladder carcinoma"[TIAB] OR "bladder carcinomas"[TIAB] OR "bladder malignancy"[TIAB] OR "bladder malignancies"[TIAB] OR "bladder neoplasm"[TIAB] OR "bladder neoplasms"[TIAB] OR "bladder tumor"[TIAB] OR "bladder tumors"[TIAB] OR "bladder tumour"[TIAB] OR "bladder tumours"[TIAB] OR "transitional cell carcinoma"[TIAB] OR "transitional cell carcinomas"[TIAB] OR "transitional cell cancer"[TIAB] OR "transitional cell cancers"[TIAB] OR "transitional cell malignancies"[TIAB] OR "transitional cell tumor"[TIAB] OR "transitional cell tumors"[TIAB] OR "transitional cell tumour"[TIAB] OR "transitional cell tumours"[TIAB] OR "urothelial cancer"[TIAB] OR "urothelial cancers"[TIAB] OR "urothelial carcinoma"[TIAB] OR "urothelial carcinomas"[TIAB] OR "urothelial malignancy"[TIAB] OR "urothelial malignancies"[TIAB] OR "urothelial tumor"[TIAB] OR "urothelial tumors"[TIAB] OR "urothelial tumour"[TIAB] OR "urothelial tumours"[TIAB] OR "urinary tract carcinoma"[TIAB] OR "urinary tract carcinomas"[TIAB] OR "urinary tract cancer"[TIAB] OR "urinary tract cancers"[TIAB] OR "urinary tract malignancy"[TIAB] OR "urinary tract malignancies"[TIAB] OR "urinary tract tumor"[TIAB] OR "urinary tract tumors"[TIAB] OR "urinary tract tumour"[TIAB] OR "urinary tract tumours"[TIAB]</p> <p>2. "exercise"[MESH] OR "Exercise Movement Techniques"[Mesh] OR "Sports"[Mesh] OR "Physical Fitness"[Mesh] OR "Physical Exertion"[Mesh] OR "Exercise Therapy"[Mesh] OR "Dance Therapy"[Mesh] OR "Recreation Therapy"[Mesh] OR "Rehabilitation, Vocational"[Mesh] OR "Telerehabilitation"[Mesh] OR "Occupational Therapy"[Mesh] OR "Self Care"[Mesh] OR "Urinary Incontinence/rehabilitation"[Mesh] OR "Pelvic Floor/therapy"[Mesh] OR "self care"[TIAB] OR</p> |

- 1  
2  
3  
4  
5  
6  
7  
8  
9  
10  
11  
12  
13  
14  
15  
16  
17  
18  
19  
20  
21  
22  
23  
24  
25  
26  
27  
28  
29  
30  
31  
32  
33  
34  
35  
36  
37  
38  
39  
40  
41  
42  
43  
44  
45  
46  
47
- "exercise"[TIAB] OR "exercising"[TIAB] OR "exercises"[TIAB] OR "sport"[TIAB] OR "sports"[TIAB] OR "physical activity"[TIAB] OR "physical activities"[TIAB] OR "physiotherapy"[TIAB] OR "kinesiotherapy"[TIAB] OR "physical conditioning"[TIAB] OR physical education\*[TIAB] OR "physical fitness"[TIAB] OR "running"[TIAB] OR "swimming"[TIAB] OR "walking"[TIAB] OR "jogging"[TIAB] OR "weight lifting"[TIAB] OR "dancing"[TIAB] OR "dance"[TIAB] OR "tai chi"[TIAB] OR "tai ji"[TIAB] OR "yoga"[TIAB] OR "pilates"[TIAB] OR "gymnastic"[TIAB] OR "gymnastics"[TIAB] OR "resistance training"[TIAB] OR "aerobic training"[TIAB] OR "anaerobic training"[TIAB] OR "muscle training"[TIAB] OR "stretching"[TIAB] OR "aerobic"[TIAB] OR "aerobics"[TIAB] OR "rehabilitation"[TIAB] OR "pre-habilitation"[TIAB] OR "prehabilitation"[TIAB] OR "aquagym"[TIAB] OR "football"[TIAB] OR "soccer"[TIAB] OR "circuit training"[TIAB] OR "fitness"[TIAB] OR "bladder training"[TIAB] OR "incontinence management"[TIAB] OR "urinary management"[TIAB]
3. "Tertiary Prevention"[Mesh] OR "Social Support"[Mesh] OR "Psychiatric Rehabilitation"[Mesh] OR "Health Promotion"[Mesh] OR "Psychotherapy"[Mesh] OR "Counseling"[Mesh] OR "Patient Education as Topic"[Mesh] OR "Sex Education"[Mesh] OR "Sexuality/rehabilitation"[Mesh] OR "Health Literacy"[Mesh] OR "psychology/education"[MESH] OR "psychology/therapy"[MESH] OR "Problem Solving"[MESH] OR "Mind-body therapies"[Mesh] OR "patient participation"[MESH] OR "Existentialism"[MESH] OR "spiritual therapies"[MESH] OR "problem-based learning"[MESH] OR "Sedentary Lifestyle"[Mesh] OR psychosocial intervention\*[TIAB] OR psychologic intervention\*[TIAB] OR psychological intervention\*[TIAB] OR psychology intervention\*[TIAB] OR social intervention\*[TIAB] OR psychosocial therap\*[TIAB] OR psychologic therap\*[TIAB] OR "psychological therapy"[TIAB] OR "psychological therapies"[TIAB] OR "psychology therapies"[TIAB] OR "psychotherapy"[TIAB] OR "tertiary health care"[TIAB] OR "tertiary prevention"[TIAB] OR "social support"[TIAB] OR social behav\*[TIAB] OR "support care"[TIAB] OR "supportive care"[TIAB] OR behavior treatment\*[TIAB] OR behavioral treatment\*[TIAB] OR behavior therap\*[TIAB] OR behavioral therap\*[TIAB] OR cognitive treatment\*[TIAB] OR cognitive therap\*[TIAB] OR "counseling"[TIAB] OR patient education\*[TIAB] OR "patient participation"[TIAB] OR health education\*[TIAB] OR sex education\*[TIAB] OR sexual education\*[TIAB] OR psychoeducation\*[TIAB] OR sex therap\*[TIAB] OR sexual therap\*[TIAB] OR stoma education\*[TIAB] OR stoma therap\*[TIAB] OR health literac\*[TIAB] OR health promotion\*[TIAB] OR health behavio\*[TIAB] OR "cognitive behavior"[TIAB] OR "behavior training"[TIAB] OR "behavioral training"[TIAB] OR "behavioural training"[TIAB] OR CBT[TIAB] OR complementary therap\*[TIAB] OR mind body therap\*[TIAB] OR spiritual therap\*[TIAB] OR relaxation therap\*[TIAB] OR "relaxation training"[TIAB] OR client centered therap\*[TIAB] OR conditioning[TIAB] OR stoma management[TIAB] OR bowel management[TIAB] OR coping [TIAB] OR mindfulness[TIAB] OR empowerment[TIAB] OR empowering[TIAB] OR self-monitoring\*[TIAB] OR motivation therap\*[TIAB] OR motivational therap\*[TIAB] OR motivation interview[TIAB] OR motivation interviewing[TIAB] OR motivational interview[TIAB] OR motivational interviewing[TIAB] OR motivation treatment\*[TIAB] OR motivational treatment\*[TIAB] OR psychology[TIAB] OR problem solv\*[TIAB] OR "psychosocial care"[TIAB] OR "psychological care"[TIAB] OR "psychologic care"[TIAB] OR caregiver support\*[TIAB] OR sociotherap\*[TIAB] OR occupational therap\*[TIAB] OR care deliver\*[TIAB] OR functional therap\*[TIAB] OR "functional training"[TIAB] OR existentialism[TIAB] OR "spiritual healing"[TIAB] OR spiritual therap\*[TIAB] OR "transcultural care"[TIAB] OR "life style"[TIAB]
4. 2 OR 3

1  
2  
3  
4  
5  
6  
7  
8  
9  
10  
11  
12  
13  
14  
15  
16  
17  
18  
19  
20  
21  
22  
23  
24  
25  
26  
27  
28  
29  
30  
31  
32  
33  
34  
35  
36  
37  
38  
39  
40  
41  
42  
43  
44  
45  
46  
47

|                                   |            |                                                                                                                                                                                                                                                                                                                                                                                                                                                                                                                                                                                                                                                                                                                                                                                                                                                                                                                                                                                                                                                                                                                                                                                                                                                                                                                                                                                                                                                                                                                                                                                                                                                                                                                                                                                                                                                                                                                                                                                                                                                                                                                                                                                                                                                                                                                                                                                                                                                                                                                                                                                                                                                                                                                                                                                                                                                                                                                                                                                                                                                                                                                                                                                                                                                                                                                                                                                                                                                                                                                                                                                                                                                                                                                                                                                                                                                                                                                                                                                                                                                                                                                                                                                                                                                                                                                                                                                               |
|-----------------------------------|------------|-----------------------------------------------------------------------------------------------------------------------------------------------------------------------------------------------------------------------------------------------------------------------------------------------------------------------------------------------------------------------------------------------------------------------------------------------------------------------------------------------------------------------------------------------------------------------------------------------------------------------------------------------------------------------------------------------------------------------------------------------------------------------------------------------------------------------------------------------------------------------------------------------------------------------------------------------------------------------------------------------------------------------------------------------------------------------------------------------------------------------------------------------------------------------------------------------------------------------------------------------------------------------------------------------------------------------------------------------------------------------------------------------------------------------------------------------------------------------------------------------------------------------------------------------------------------------------------------------------------------------------------------------------------------------------------------------------------------------------------------------------------------------------------------------------------------------------------------------------------------------------------------------------------------------------------------------------------------------------------------------------------------------------------------------------------------------------------------------------------------------------------------------------------------------------------------------------------------------------------------------------------------------------------------------------------------------------------------------------------------------------------------------------------------------------------------------------------------------------------------------------------------------------------------------------------------------------------------------------------------------------------------------------------------------------------------------------------------------------------------------------------------------------------------------------------------------------------------------------------------------------------------------------------------------------------------------------------------------------------------------------------------------------------------------------------------------------------------------------------------------------------------------------------------------------------------------------------------------------------------------------------------------------------------------------------------------------------------------------------------------------------------------------------------------------------------------------------------------------------------------------------------------------------------------------------------------------------------------------------------------------------------------------------------------------------------------------------------------------------------------------------------------------------------------------------------------------------------------------------------------------------------------------------------------------------------------------------------------------------------------------------------------------------------------------------------------------------------------------------------------------------------------------------------------------------------------------------------------------------------------------------------------------------------------------------------------------------------------------------------------------------------------|
|                                   |            | 5. 1 AND 4                                                                                                                                                                                                                                                                                                                                                                                                                                                                                                                                                                                                                                                                                                                                                                                                                                                                                                                                                                                                                                                                                                                                                                                                                                                                                                                                                                                                                                                                                                                                                                                                                                                                                                                                                                                                                                                                                                                                                                                                                                                                                                                                                                                                                                                                                                                                                                                                                                                                                                                                                                                                                                                                                                                                                                                                                                                                                                                                                                                                                                                                                                                                                                                                                                                                                                                                                                                                                                                                                                                                                                                                                                                                                                                                                                                                                                                                                                                                                                                                                                                                                                                                                                                                                                                                                                                                                                                    |
| EMBASE (via Embase.com interface) | 13/12/2016 | <p>1. 'bladder tumor'/exp OR 'urinary tract carcinoma'/exp OR 'bladder surgery'/exp OR 'transitional cell carcinoma'/exp OR 'bladder cancer':ab,ti OR 'bladder cancers':ab,ti OR 'bladder carcinoma':ab,ti OR 'bladder carcinomas':ab,ti OR 'bladder malignancy':ab,ti OR 'bladder malignancies':ab,ti OR 'bladder neoplasm':ab,ti OR 'bladder neoplasms':ab,ti OR 'bladder tumor':ab,ti OR 'bladder tumors':ab,ti OR 'bladder tumour':ab,ti OR 'bladder tumours':ab,ti OR 'transitional cell carcinoma':ab,ti OR 'transitional cell carcinomas':ab,ti OR 'transitional cell cancer':ab,ti OR 'transitional cell cancers':ab,ti OR 'transitional cell malignancies':ab,ti OR 'transitional cell tumor':ab,ti OR 'transitional cell tumors':ab,ti OR 'transitional cell tumour':ab,ti OR 'transitional cell tumours':ab,ti OR 'urothelial cancer':ab,ti OR 'urothelial cancers':ab,ti OR 'urothelial carcinoma':ab,ti OR 'urothelial carcinomas':ab,ti OR 'urothelial malignancy':ab,ti OR 'urothelial malignancies':ab,ti OR 'urothelial tumor':ab,ti OR 'urothelial tumors':ab,ti OR 'urothelial tumour':ab,ti OR 'urothelial tumours':ab,ti OR 'urinary tract carcinoma':ti,ab OR 'urinary tract carcinomas':ti,ab OR 'urinary tract cancer':ti,ab OR 'urinary tract cancers':ti,ab OR 'urinary tract malignance':ti,ab OR 'urinary tract malignancy':ti,ab OR 'urinary tract malignancies':ti,ab OR 'urinary tract tumor':ti,ab OR 'urinary tract tumors':ti,ab OR 'urinary tract tumour':ti,ab OR 'urinary tract tumours':ti,ab</p> <p>2. 'physical activity'/exp OR 'exercise'/exp OR 'physiotherapy'/exp OR 'kinesiotherapy'/exp OR 'fitness'/exp OR 'sport'/exp OR 'bladder training'/exp OR 'cancer rehabilitation'/exp OR 'cognitive rehabilitation'/exp OR 'functional training'/exp OR 'geriatric rehabilitation'/exp OR 'muscle training'/exp OR 'home rehabilitation'/exp OR 'occupational therapy'/exp OR 'pelvic floor muscle training'/exp OR 'self care':ab,ti OR 'exercise':ab,ti OR 'exercising':ab,ti OR 'exercises':ab,ti OR 'sport':ab,ti OR 'sports':ab,ti OR 'physical activity':ab,ti OR 'physical activities':ab,ti OR 'physiotherapy':ab,ti OR 'kinesiotherapy':ab,ti OR 'physical conditioning':ab,ti OR 'physical education*':ab,ti OR 'physical fitness':ab,ti OR 'running':ab,ti OR 'swimming':ab,ti OR 'walking':ab,ti OR 'jogging':ab,ti OR 'weight lifting':ab,ti OR 'dancing':ab,ti OR 'dance':ab,ti OR 'tai chi':ab,ti OR 'tai ji':ab,ti OR 'yoga':ab,ti OR 'pilates':ab,ti OR 'gymnastic':ab,ti OR 'gymnastics':ab,ti OR 'resistance training':ab,ti OR 'aerobic training':ab,ti OR 'anaerobic training':ab,ti OR 'muscle training':ab,ti OR 'stretching':ab,ti OR 'aerobic':ab,ti OR 'aerobics':ab,ti OR 'rehabilitation':ab,ti OR 'pre-habilitation':ab,ti OR 'prehabilitation':ab,ti OR 'aquagym':ab,ti OR 'football':ab,ti OR 'soccer':ab,ti OR 'circuit training':ab,ti OR 'fitness':ab,ti OR 'bladder training':ab,ti OR 'incontinence management':ab,ti OR 'urinary management':ab,ti</p> <p>3. 'psychosocial rehabilitation'/exp OR 'recreational therapy'/exp OR 'sociotherapy'/exp OR 'telerehabilitation'/exp OR 'vocational rehabilitation'/exp OR 'caregiver support'/exp OR 'psychosocial care'/exp OR 'social support'/exp OR 'spiritual care'/exp OR 'psychotherapy'/exp OR 'preoperative education'/exp OR 'psychoeducation'/exp OR 'patient education'/exp OR 'health promotion'/exp OR 'reinforcement'/exp OR 'patient participation'/exp OR 'counseling'/exp OR 'problem solving'/exp OR 'home physiotherapy'/exp OR 'cancer prevention'/exp OR 'learning'/exp OR 'rehabilitation care'/exp OR 'bladder and bowel management'/exp OR 'empowerment'/exp OR 'coping behavior'/exp OR 'social interaction'/exp OR 'social participation'/exp OR 'behavior change'/exp OR 'lifestyle'/exp OR 'psychosocial intervention*':ab,ti OR 'psychologic intervention*':ab,ti OR 'psychological intervention*':ab,ti OR 'psychology intervention*':ab,ti OR 'social intervention*':ab,ti OR 'psychosocial therap*':ab,ti OR 'psychologic therap*':ab,ti OR 'psychological therapy':ab,ti OR 'psychological therapies':ab,ti OR 'psychology therapies':ab,ti OR 'psychotherapy':ab,ti OR 'tertiary health care':ab,ti OR 'tertiary prevention':ab,ti OR 'social support':ab,ti OR 'social behav*':ab,ti OR 'support care':ab,ti OR 'supportive</p> |

1  
2  
3  
4  
5  
6  
7  
8  
9  
10  
11  
12  
13  
14  
15  
16  
17  
18  
19  
20  
21  
22  
23  
24  
25  
26  
27  
28  
29  
30  
31  
32  
33  
34  
35  
36  
37  
38  
39  
40  
41  
42  
43  
44  
45  
46  
47

|                |            |                                                                                                                                                                                                                                                                                                                                                                                                                                                                                                                                                                                                                                                                                                                                                                                                                                                                                                                                                                                                                                                                                                                                                                                                                                                                                                                                                                                                                                                                                                                                                                                                                                                                                                                                                                                                                                                                                                                                                                                                                                                                                                                                                                            |
|----------------|------------|----------------------------------------------------------------------------------------------------------------------------------------------------------------------------------------------------------------------------------------------------------------------------------------------------------------------------------------------------------------------------------------------------------------------------------------------------------------------------------------------------------------------------------------------------------------------------------------------------------------------------------------------------------------------------------------------------------------------------------------------------------------------------------------------------------------------------------------------------------------------------------------------------------------------------------------------------------------------------------------------------------------------------------------------------------------------------------------------------------------------------------------------------------------------------------------------------------------------------------------------------------------------------------------------------------------------------------------------------------------------------------------------------------------------------------------------------------------------------------------------------------------------------------------------------------------------------------------------------------------------------------------------------------------------------------------------------------------------------------------------------------------------------------------------------------------------------------------------------------------------------------------------------------------------------------------------------------------------------------------------------------------------------------------------------------------------------------------------------------------------------------------------------------------------------|
|                |            | <p>care':ab,ti OR 'behavior treatment*':ab,ti OR 'behavioral treatment*':ab,ti OR 'behavior therap*':ab,ti OR 'behavioral therap*':ab,ti OR 'cognitive treatment*':ab,ti OR 'cognitive therap*':ab,ti OR 'counseling':ab,ti OR 'patient education*':ab,ti OR 'patient participation':ab,ti OR 'health education*':ab,ti OR 'sex education*':ab,ti OR 'sexual education*':ab,ti OR 'psychoeducation*':ab,ti OR 'sex therap*':ab,ti OR 'sexual therap*':ab,ti OR 'stoma education*':ab,ti OR 'stoma therap*':ab,ti OR 'health literac*':ab,ti OR 'health promotion*':ab,ti OR 'health behavio*':ab,ti OR 'cognitive behavior':ab,ti OR 'behavior training':ab,ti OR 'behavioral training':ab,ti OR 'behavioural training':ab,ti OR 'CBT':ab,ti OR 'complementary therap*':ab,ti OR 'mind body therap*':ab,ti OR 'spiritual therap*':ab,ti OR 'relaxation therap*':ab,ti OR 'relaxation training':ab,ti OR 'client centered therap*':ab,ti OR 'conditioning':ab,ti OR 'stoma management':ab,ti OR 'bowel management':ab,ti OR 'coping':ab,ti OR 'mindfulness':ab,ti OR 'empowerment':ab,ti OR 'empowering':ab,ti OR 'self-monitoring*':ab,ti OR 'motivation therap*':ab,ti OR 'motivational therap*':ab,ti OR 'motivation interview':ab,ti OR 'motivation interviewing':ab,ti OR 'motivational interview':ab,ti OR 'motivational interviewing':ab,ti OR 'motivation treatment*':ab,ti OR 'motivational treatment*':ab,ti OR 'psychology':ab,ti OR 'problem solv*':ab,ti OR 'psychosocial care':ab,ti OR 'psychological care':ab,ti OR 'psychologic care':ab,ti OR 'caregiver support*':ab,ti OR 'sociotherap*':ab,ti OR 'occupational therap*':ab,ti OR 'care deliver*':ab,ti OR 'functional therap*':ab,ti OR 'functional training':ab,ti OR 'existentialism':ab,ti OR 'spiritual healing':ab,ti OR 'spiritual therap*':ab,ti OR 'transcultural care':ab,ti OR 'life style':ab,ti</p> <p>4. 2 OR 3<br/>5. 1 AND 4</p>                                                                                                                                                                                                                                                        |
| Web of Science | 13/12/2016 | <p>1. TS=("bladder cancer") OR TS=("bladder cancers") OR TS=("bladder carcinoma") OR TS=("bladder carcinomas") OR TS=("bladder malignancy") OR TS=("bladder malignancies") OR TS=("bladder neoplasm") OR TS=("bladder neoplasms") OR TS=("bladder tumor") OR TS=("bladder tumors")OR TS=("bladder tumour") OR TS=("bladder tumours") OR TS=("transitional cell carcinoma") OR TS=("transitional cell carcinomas") OR TS=("transitional cell cancer") OR TS=("transitional cell cancers") OR TS=("transitional cell malignancies") OR TS=("transitional cell tumor") OR TS=("transitional cell tumors") OR TS=("transitional cell tumour") OR TS=("transitional cell tumours") OR TS=("urothelial cancer") OR TS=("urothelial cancers") OR TS=("urothelial carcinoma") OR TS=("urothelial carcinomas")OR TS=("urothelial malignancy") OR TS=("urothelial malignancies") OR TS=("urothelial tumor") OR TS=("urothelial tumors")OR TS=("urothelial tumour") OR TS=("urothelial tumours") OR TS=("urinary tract carcinoma") OR TS=("urinary tract carcinomas") OR TS=("urinary tract cancer") OR TS=("urinary tract cancers") OR TS=("urinary tract malignancy") OR TS=("urinary tract malignancies") OR TS=("urinary tract tumor") OR TS=("urinary tract tumors") OR TS=("urinary tract tumour") OR TS=("urinary tract tumours")</p> <p>2. TS=("self care") OR TS=(exercise) OR TS=(exercising) OR TS=(exercises) OR TS=(sport) OR TS=(sports) OR TS=("physical activity") OR TS=("physical activities") OR TS=(physiotherapy) OR TS=(kinesiotherapy) OR TS=("physical conditioning") OR TS=("physical education*") OR TS=("physical fitness") OR TS=(running) OR TS=(swimming) OR TS=(walking) OR TS=(jogging) OR TS=("weight lifting") OR TS=(dancing) OR TS=(dance) OR TS=("tai chi") OR TS=("tai ji") OR TS=(yoga) OR TS=(pilates) OR TS=(gymnastic) OR TS=(gymnastics) OR TS=("resistance training") OR TS=("aerobic training") OR TS=("anaerobic training") OR TS=("muscle training") OR TS=(stretching) OR TS=(aerobic) OR TS=(aerobics) OR TS=(rehabilitation) OR TS=("pre-habilitation") OR TS=(prehabilitation) OR TS=(aquagym) OR TS=(football) OR TS=(soccer)</p> |

- OR TS=("circuit training") OR TS=(fitness) OR TS=("bladder training") OR TS=("incontinence management") OR TS=("urinary management")
3. TS=("psychosocial intervention\*")OR TS=("psychologic intervention\*") OR TS=("psychological intervention\*")OR TS=("psychology intervention\*")OR TS=("social intervention\*") OR TS=("psychosocial therap\*")OR TS=("psychologic therap\*")OR TS=("psychological therapy")OR TS=("psychological therapies") OR TS=("psychology therapies") OR TS=(psychotherapy) OR TS=("tertiary health care") OR TS=("tertiary prevention") OR TS=("social support") OR TS=("social behav\*") OR TS=("support care") OR TS=("supportive care") OR TS=("behavior treatment\*") OR TS=("behavioral treatment\*")OR TS=("behavior therap\*")OR TS=("behavioral therap\*") OR TS=("cognitive treatment\*") OR TS=("cognitive therap\*") OR TS=(counseling) OR TS=("patient education\*")OR TS=("patient participation")OR TS=("health education\*")OR TS=("sex education\*") OR TS=("sexual education\*")OR TS=(psychoeducation\*)OR TS=("sex therap\*")OR TS=("sexual therap\*") OR TS=("stoma education\*")OR TS=("stoma therap\*")OR TS=("health literac\*") OR TS=("health promotion\*")OR TS=("health behavio\*") OR TS=("cognitive behavior") OR TS=("behavior training") OR TS=("behavioral training") OR TS=("behavioural training") OR TS=(CBT) OR TS=("complementary therap\*")OR TS=("mind body therap\*")OR TS=("spiritual therap\*")OR TS=("relaxation therap\*")OR TS=("relaxation training") OR TS=("client centered therap\*")OR TS=(conditioning)OR TS=("stoma management")OR TS=("bowel management") OR TS=(coping) OR TS=(mindfulness)OR TS=(empowerment) OR TS=(empowering) OR TS=("self-monitoring\*")OR TS=("motivation therap\*")OR TS=("motivational therap\*")OR TS=("motivation interview") OR TS=("motivation interviewing") OR TS=("motivational interview") OR TS=("motivational interviewing") OR TS=("motivation treatment\*")OR TS=("motivational treatment\*")OR TS=(psychology)OR TS=("problem solv\*")OR TS=("psychosocial care")OR TS=("psychological care")OR TS=("psychologic care")OR TS=("caregiver support\*")OR TS=(sociotherap\*) OR TS=("occupational therap\*") OR TS=("care deliver\*")OR TS=("functional therap\*")OR TS=("functional training") OR TS=(existentialism)OR TS=("spiritual healing") OR TS=("spiritual therap\*")OR TS=("transcultural care") OR TS=("life style")
4. 2 OR 3
5. 1 AND 4

PEDro 13/12/2016 Title/abstract: bladder cancer

The **cited and citing** articles of the included studies, retrieved with the above searches, will be screened through **Web of Science** to potentially identify other studies.

**PRISMA-P (Preferred Reporting Items for Systematic review and Meta-Analysis Protocols) 2015 checklist: recommended items to address in a systematic review protocol\***

| Section and topic                 | Item No | Checklist item                                                                                                                                                                                                                                                            |
|-----------------------------------|---------|---------------------------------------------------------------------------------------------------------------------------------------------------------------------------------------------------------------------------------------------------------------------------|
| <b>ADMINISTRATIVE INFORMATION</b> |         | <b>line number; page number</b>                                                                                                                                                                                                                                           |
| Title:                            |         |                                                                                                                                                                                                                                                                           |
| Identification                    | 1a      | Identify the report as a protocol of a systematic review 2-3; 1                                                                                                                                                                                                           |
| Update                            | 1b      | If the protocol is for an update of a previous systematic review, identify as such                                                                                                                                                                                        |
| Registration                      | 2       | If registered, provide the name of the registry (such as PROSPERO) and registration number 62; 2                                                                                                                                                                          |
| Authors:                          |         |                                                                                                                                                                                                                                                                           |
| Contact                           | 3a      | Provide name, institutional affiliation, e-mail address of all protocol authors; provide physical mailing address of corresponding author 4-22; 1                                                                                                                         |
| Contributions                     | 3b      | Describe contributions of protocol authors and identify the guarantor of the review 410-413; 13                                                                                                                                                                           |
| Amendments                        | 4       | If the protocol represents an amendment of a previously completed or published protocol, identify as such and list changes; otherwise, state plan for documenting important protocol amendments                                                                           |
| Support:                          |         |                                                                                                                                                                                                                                                                           |
| Sources                           | 5a      | Indicate sources of financial or other support for the review 415-416; 13                                                                                                                                                                                                 |
| Sponsor                           | 5b      | Provide name for the review funder and/or sponsor 415; 13                                                                                                                                                                                                                 |
| Role of sponsor or funder         | 5c      | Describe roles of funder(s), sponsor(s), and/or institution(s), if any, in developing the protocol 415-416; 13                                                                                                                                                            |
| <b>INTRODUCTION</b>               |         |                                                                                                                                                                                                                                                                           |
| Rationale                         | 6       | Describe the rationale for the review in the context of what is already known 92-199; 4-6                                                                                                                                                                                 |
| Objectives                        | 7       | Provide an explicit statement of the question(s) the review will address with reference to participants, interventions, comparators, and outcomes (PICO) 200-206; 6-7                                                                                                     |
| <b>METHODS</b>                    |         |                                                                                                                                                                                                                                                                           |
| Eligibility criteria              | 8       | Specify the study characteristics (such as PICO, study design, setting, time frame) 215-273; 7-9 and report characteristics (such as years considered 276; 9, language 293-295; 10, publication status 295-297; 10) to be used as criteria for eligibility for the review |
| Information sources               | 9       | Describe all intended information sources (such as electronic databases, contact with study authors, trial registers or other grey literature sources) with planned dates of coverage 276-283; 9                                                                          |
| Search strategy                   | 10      | Present draft of search strategy to be used for at least one electronic database, including planned limits, such that it could be repeated Supplementary file 1 Supplementary file 1                                                                                      |



|                                    |     |                                                                                                                                                                                                                                                                              |
|------------------------------------|-----|------------------------------------------------------------------------------------------------------------------------------------------------------------------------------------------------------------------------------------------------------------------------------|
| Study records:                     |     |                                                                                                                                                                                                                                                                              |
| Data management                    | 11a | Describe the mechanism(s) that will be used to manage records and data throughout the review 286-288; 9-10                                                                                                                                                                   |
| Selection process                  | 11b | State the process that will be used for selecting studies (such as two independent reviewers) through each phase of the review 288-292; 9-10                                                                                                                                 |
| Data collection process            | 11c | Describe planned method of extracting data from reports (such as piloting forms, done independently, in duplicate), any processes for obtaining and confirming data from investigators 299-302; 10                                                                           |
| Data items                         | 12  | List and define all variables for which data will be sought (such as PICO items, funding sources), any pre-planned data assumptions and simplifications 303-325; 10                                                                                                          |
| Outcomes and prioritization        | 13  | List and define all outcomes for which data will be sought, including prioritization of main and additional outcomes, with rationale 250-270; 8                                                                                                                              |
| Risk of bias in individual studies | 14  | Describe anticipated methods for assessing risk of bias of individual studies, including whether this will be done at the outcome or study level, or both; state how this information will be used in data synthesis 327-334; 10                                             |
| Data synthesis                     | 15a | Describe criteria under which study data will be quantitatively synthesised 345-351; 11-12                                                                                                                                                                                   |
|                                    | 15b | If data are appropriate for quantitative synthesis, describe planned summary measures, methods of handling data and methods of combining data from studies, including any planned exploration of consistency (such as $I^2$ , Kendall's $\tau$ ) 349-351; 11, 356-361; 10-11 |
|                                    | 15c | Describe any proposed additional analyses (such as sensitivity or subgroup analyses, meta-regression) 362-370; 12                                                                                                                                                            |
|                                    | 15d | If quantitative synthesis is not appropriate, describe the type of summary planned 356; 11                                                                                                                                                                                   |
| Meta-bias(es)                      | 16  | Specify any planned assessment of meta-bias(es) (such as publication bias across studies) 352-354; 11                                                                                                                                                                        |
| Confidence in cumulative evidence  | 17  | Describe how the strength of the body of evidence will be assessed (such as GRADE) 334-335; 11                                                                                                                                                                               |

**\* It is strongly recommended that this checklist be read in conjunction with the PRISMA-P Explanation and Elaboration (cite when available) for important clarification on the items. Amendments to a review protocol should be tracked and dated. The copyright for PRISMA-P (including checklist) is held by the PRISMA-P Group and is distributed under a Creative Commons Attribution Licence 4.0.**

*From: Shamseer L, Moher D, Clarke M, Ghersi D, Liberati A, Petticrew M, Shekelle P, Stewart L, PRISMA-P Group. Preferred reporting items for systematic review and meta-analysis protocols (PRISMA-P) 2015: elaboration and explanation. BMJ. 2015 Jan 2;349(jan02 1):g7647.*

# BMJ Open

## Rehabilitation interventions to improve patient reported outcomes and physical fitness in survivors of muscle invasive bladder cancer: a systematic review protocol

|                                 |                                                                                                                                                                                                                                                                                                                                                                                                                                                                                                                                                                                                                                                                                                                                                                                                                                                                                            |
|---------------------------------|--------------------------------------------------------------------------------------------------------------------------------------------------------------------------------------------------------------------------------------------------------------------------------------------------------------------------------------------------------------------------------------------------------------------------------------------------------------------------------------------------------------------------------------------------------------------------------------------------------------------------------------------------------------------------------------------------------------------------------------------------------------------------------------------------------------------------------------------------------------------------------------------|
| Journal:                        | <i>BMJ Open</i>                                                                                                                                                                                                                                                                                                                                                                                                                                                                                                                                                                                                                                                                                                                                                                                                                                                                            |
| Manuscript ID                   | bmjopen-2017-016054.R2                                                                                                                                                                                                                                                                                                                                                                                                                                                                                                                                                                                                                                                                                                                                                                                                                                                                     |
| Article Type:                   | Protocol                                                                                                                                                                                                                                                                                                                                                                                                                                                                                                                                                                                                                                                                                                                                                                                                                                                                                   |
| Date Submitted by the Author:   | 12-Apr-2017                                                                                                                                                                                                                                                                                                                                                                                                                                                                                                                                                                                                                                                                                                                                                                                                                                                                                |
| Complete List of Authors:       | Rammant, Elke; Universitair Ziekenhuis Gent, Department of Radiation Oncology and Experimental Cancer Research<br>Bultijnck, Renée; Universitair Ziekenhuis Gent, Department of Radiation Oncology and Experimental Cancer Research<br>Sundahl, Nora; Universitair Ziekenhuis Gent, Department of Radiation Oncology and Experimental Cancer Research<br>Ost, Piet; Universitair Ziekenhuis Gent, Department of Radiation Oncology and Experimental Cancer Research<br>Pauwels, Nele; Universitair Ziekenhuis Gent, Knowledge Center Ghent<br>Deforche, Benedicte; Universiteit Gent, Department of Public Health<br>Pieters, Ronny; Universitair Ziekenhuis Gent, Department of Urology<br>Decaestecker, Karel; Universitair Ziekenhuis Gent, Department of Urology<br>Fonteyne, Valérie; Universitair Ziekenhuis Gent, Department of Radiation Oncology and Experimental Cancer Research |
| <b>Primary Subject Heading</b>: | Urology                                                                                                                                                                                                                                                                                                                                                                                                                                                                                                                                                                                                                                                                                                                                                                                                                                                                                    |
| Secondary Subject Heading:      | Evidence based practice, Oncology, Rehabilitation medicine                                                                                                                                                                                                                                                                                                                                                                                                                                                                                                                                                                                                                                                                                                                                                                                                                                 |
| Keywords:                       | Muscle invasive bladder cancer, Exercise, Psychosocial intervention, systematic review, Rehabilitation                                                                                                                                                                                                                                                                                                                                                                                                                                                                                                                                                                                                                                                                                                                                                                                     |
|                                 |                                                                                                                                                                                                                                                                                                                                                                                                                                                                                                                                                                                                                                                                                                                                                                                                                                                                                            |

SCHOLARONE™  
Manuscripts

1  
2  
3 **Rehabilitation interventions to improve patient reported outcomes and**  
4 **physical fitness in survivors of muscle invasive bladder cancer: a systematic**  
5 **review protocol**  
6  
7

8 Elke Rammant<sup>1</sup>, Renée Bultijnck<sup>1</sup>, Nora Sundahl<sup>1</sup>, Piet Ost<sup>1</sup>, Nele S. Pauwels<sup>2</sup>, Benedicte  
9 Deforche<sup>3</sup>, Ronny Pieters<sup>4</sup>, Karel Decaestecker<sup>4</sup>, Valérie Fonteyne<sup>1</sup>  
10  
11

12  
13  
14 **Affiliations:**

- 15  
16 1. Department of Radiation Oncology and Experimental Cancer Research, Ghent  
17 University Hospital, Ghent, Belgium  
18 2. Knowledge Center Ghent, Ghent University Hospital, Ghent, Belgium  
19 3. Department of Public Health, Ghent University, Ghent, Belgium  
20 4. Department of Urology, Ghent University Hospital, Ghent, Belgium  
21  
22  
23  
24

25 **Corresponding Author:**

26  
27  
28 Elke Rammant, MSc.  
29 Department of Radiation Oncology and Experimental Cancer Research,  
30 Ghent University Hospital  
31 De Pintelaan 185, B-9000 Ghent, Belgium  
32 Tel: +32 9 33 21552  
33 E-mail: [elke.rammant@ugent.be](mailto:elke.rammant@ugent.be)  
34  
35  
36

37 **Word count excluding title page, abstract, references, figures and tables: 3537**  
38  
39  
40  
41  
42  
43  
44  
45  
46  
47  
48  
49  
50  
51  
52  
53  
54  
55  
56  
57  
58  
59  
60

## ABSTRACT

### Introduction

Survivors of muscle invasive bladder cancer (MIBC) experience physical and psychosocial side effects of cancer diagnosis and treatment. These negative side effects have a crucial impact on their health-related quality of life (HRQoL). To date, there is evidence that rehabilitation interventions such as physical activity and psychosocial support have a positive effect on the HRQoL of cancer survivors. Unfortunately, there are no specific guidelines for rehabilitation or survivorship programs for MIBC survivors. Therefore, this systematic review aims to assess the effects of exercise-based and psychosocial rehabilitation interventions on MIBC survivors.

### Methods and analysis

The approach of this review is consistent with the Cochrane methodology. Randomized controlled trials and non-randomized studies will be included. The population of interest is patients ( $\geq 18$  years of age) with diagnosis of MIBC or high risk non-MIBC for whom a radical cystectomy is indicated. There will be two eligible intervention types for inclusion: exercise-based and psychosocial rehabilitation interventions. The primary outcome measures are patient reported outcomes (e.g. HRQoL, fatigue, pain) and physical fitness. Studies will be identified independently by two review authors by searching the Cochrane Central Register of Controlled Trials, MEDLINE, Embase, Web of Science and the Physiotherapy Evidence Database. A third reviewer will be asked by disagreements. Risk of bias will be assessed using the Cochrane Collaboration tool and the Newcastle-Ottawa Scale. Data will be summarized descriptively. If homogeneity of the studies is sufficient, meta-analysis will be undertaken. The broad scope of this review (i.e. different interventions and study designs) is needed to have a comprehensive view on effective rehabilitation interventions.

### Ethics and dissemination

Ethics approval is not required, as no primary data will be collected. Results will be disseminated through a peer-reviewed publication.

**PROSPERO registration number:** CRD42017055306

### Keywords

Bladder neoplasm— exercise – psychosocial intervention – rehabilitation

## Strengths and limitations of this study

### Strengths

- The overall approach of this review is consistent with the methodology described in the Cochrane Handbook for Systematic reviews of Interventions
- It's an innovative topic in the field of bladder cancer.
- Actual problem because the incidence of bladder cancer is rising.

### Limitations

- Possible paucity of studies meeting the inclusion criteria.

## BACKGROUND

### Description of the condition

Bladder cancer (BC) is the 11<sup>th</sup> most common cancer worldwide. When both genders are considered separately, BC in men is rising to the 7<sup>th</sup> place whilst BC in women is dropping to the 17<sup>th</sup> place of most common cancer worldwide<sup>1,2</sup>. Since BC is mainly diagnosed at more advanced age, the incidence is expected to raise due to an increased life expectancy.<sup>3,4</sup> Thirty percent of the BC patients are diagnosed with muscle invasive BC (MIBC, stages T2-T4)<sup>5</sup> and up to 45% of patients with non-MIBC (NMIBC) will eventually progress to MIBC<sup>6</sup>. The standard treatment of MIBC is neo-adjuvant chemotherapy followed by radical cystectomy combined with an extended pelvic lymph node dissection and urinary diversion (continent or incontinent bladder replacement). Also patients with high-risk NMIBC can be offered a radical cystectomy.<sup>1</sup> This aggressive approach is associated with a variety of negative side effects, mainly hampering urinary, gastro-intestinal and sexual function. This can lead to a loss of health-related quality of life (HRQoL), which refers to the patients' own perceptions of their health and ability to function<sup>7</sup> encompassing physical, psychological, social, and spiritual dimensions<sup>8</sup>. Bladder preserving radiochemotherapy is an alternative for radical cystectomy. Both radiotherapy and chemotherapy can also be used in the adjuvant or palliative setting and can cause important treatment related side effects. Therefore, follow-up care beyond the acute diagnosis and treatment phase is necessary<sup>9</sup>.

### Description of the intervention

The World Health Organisation (WHO) has defined rehabilitation as "the use of all means aimed at reducing the impact of disabling and handicapping conditions at enabling people with disabilities to achieve optimal social integration"<sup>10</sup>. A more specific definition of rehabilitation in the setting of cancer is the following: "cancer rehabilitation is a concept that is defined by the patient and involves helping a person with cancer to obtain maximum physical, social, psychological, and vocational functioning within the limit by the disease and its treatment"<sup>11</sup>. Therefore, cancer rehabilitation needs to comprise different intervention approaches<sup>12,13</sup>.

Physical activity (PA) is seen as one of the rehabilitation interventions to improve patients quality of life (QoL) and survival outcomes. PA is defined as "any movement created by the skeletal muscles that causes a substantial increase in energy expenditure"<sup>14</sup>. It is important to point out that 'physical activity' and 'exercise' are not similar. PA can be seen as an overarching term that includes exercise as well as other activities which involve bodily movement and are done as part of playing, working, active transportation, house chores and recreational activities. Exercise on the other hand, is a subcategory of PA. It is planned, structured, repetitive and purposeful to improve or maintain one or more components of

1  
2  
3 physical fitness (cardiorespiratory fitness, muscular strength, muscular endurance, flexibility  
4 and body composition)<sup>15</sup>. These components represent important outcomes in cancer  
5 survivors that may mediate the influence of exercise on other outcomes<sup>14</sup>.  
6

7  
8 Psychosocial interventions are another important focus in rehabilitation. These sort of  
9 interventions aim to help patients cope with negative side effects of cancer diagnosis and  
10 treatment<sup>16</sup>. Based on a framework proposed by Buffart et al., there are five categories of  
11 interventions: patient education, social support, coping skills training, psychotherapy and  
12 spiritual/existential therapy<sup>17</sup>.  
13

### 14 15 **How the intervention might work**

16  
17 In order to explain how cancer rehabilitation interventions might work, the revised Wilson  
18 and Cleary Model for HRQoL will be used as a conceptual framework<sup>18</sup>. This is useful to  
19 explain the pathways between different patient outcomes<sup>19</sup>. The model proposes five types  
20 of patient outcome measurements (biological function, symptoms, functional status, health  
21 perception and overall QOL), which have a causal relationship<sup>18 20</sup>. These five patient  
22 outcome measurements can be influenced by individual and environment characteristics.  
23  
24

25  
26 In case of bladder cancer, morbidity associated with the disease and its treatment can lead  
27 to complications related to urinary diversion, urinary incontinence or constipation, sexual  
28 dysfunction<sup>21</sup>, fatigue, and psychological distress<sup>22</sup>. This can potentially lead to a loss of  
29 physical, social, psychological and role function, which affects activities in daily life. As a  
30 consequence, the general health perceptions of the patient can be damaged which can  
31 finally lead to an overall impaired QOL. All of these outcomes can be influenced by  
32 environment and individual characteristics.  
33  
34

35  
36 Offering cancer rehabilitation can be seen as a physical environment characteristic. Since it  
37 has been proven in other cancer populations that cancer rehabilitation interventions have  
38 a positive influence on for example physical fitness<sup>23</sup>, muscle capacity<sup>24</sup>, fatigue and  
39 emotional distress<sup>25</sup>, we can conclude, according to the revised Wilson and Cleary Model for  
40 HRQoL, that cancer rehabilitation interventions can have a positive influence on other  
41 patient outcomes such as HRQoL<sup>18</sup>.  
42  
43

44  
45 Individual characteristics, such as advanced age and the associated increased risk of co  
46 morbidities, are important factors to take into account in BC patients. These characteristics  
47 are associated with poorer health<sup>26</sup> such as functional and psychosocial declines<sup>27</sup>. Although  
48 this supports the need for cancer rehabilitation, the older age of BC patients creates  
49 challenges in recommending rehabilitation interventions. Potential difficulties are the lack of  
50 social support in older patients and the need for extra time and resources to enroll these  
51 patients<sup>28</sup>. Additionally, the high prevalence of urinary complications and problems with  
52 body image in BC patients can act as potential barriers to participate in exercise  
53 interventions<sup>26</sup>. According to Karvinen et al., exercise interventions for BC survivors should  
54 focus on offering enjoyable activities, education on the benefits of regular exercise,  
55  
56  
57  
58  
59

1  
2  
3 improving activity levels in important others and targeting perceived barriers. They also note  
4 that adjuvant therapy, age and invasiveness of the tumor may affect exercise participation<sup>26</sup>.  
5 Furthermore, BC survivors seem to be most interested in walking and home-based,  
6 individual exercises that are not supervised<sup>29</sup>.  
7

### 8 9 **Why it is important to do this review**

10  
11 With an increasing number of cancer survivors, cancer rehabilitation will become imperative  
12 in cancer survivorship. In order to develop evidence-based rehabilitation programs for BC  
13 patients, who received a curative treatment it is essential to have a global picture of  
14 effective rehabilitation interventions. Therefore, a systematic review assessing the effects of  
15 exercise-based and psychosocial rehabilitation interventions for BC patients is needed. A  
16 previous systematic review assessed the effects of lifestyle factors (diet, smoking and  
17 physical activity) on HRQoL in BC survivors. Findings of this review concluded that there was  
18 limited evidence to support a positive association between HRQoL and physical activity in BC  
19 survivors<sup>30</sup>. Our review differs with previous review in several aspects. First we want to  
20 identify well-defined interventions that are effective. In previous review, they evaluated the  
21 physical activity pattern of the patient, which is not the same as an exercise intervention.  
22 Furthermore, this review will not only focus on HRQoL, we will also assess the effects of  
23 rehabilitation interventions on other outcomes (explained below). Additionally, to our  
24 knowledge, there is no systematic review that has summarized the evidence of psychosocial  
25 rehabilitation interventions for MIBC survivors in a systematic manner.  
26  
27  
28  
29  
30

31  
32 So far, no specific guidelines exist for exercise-based and/or psychosocial rehabilitation  
33 interventions for MIBC survivors. This review could give guidance to the development of  
34 specific evidence-based guidelines. Although this review focuses only on the exercise and  
35 psychosocial part of rehabilitation, it is important to note that rehabilitation of cancer  
36 patients requires also other interventions such as diet counseling, smoking cessation, etc.<sup>12</sup>.  
37  
38

39  
40 It should also be noticed that providing cancer rehabilitation is an often-neglected facet of  
41 cancer care in terms of health policy and infrastructure<sup>31</sup>. Frequently reported barriers to  
42 rehabilitation interventions are the lack of expertise, inappropriate referrals by physicians,  
43 funding issues<sup>24 31</sup> and availability of rehabilitation resources<sup>32</sup>. The results of this review  
44 may increase the awareness of physicians and funders of the importance of cancer  
45 rehabilitation.  
46

## 47 48 **AIMS AND OBJECTIVES**

### 49 50 **Primary objective**

51  
52 1. Assessing the effects of rehabilitation interventions (exercise-based and psychosocial  
53 interventions) on patient reported outcomes (PROs) (e.g. QoL, fatigue, pain) and physical  
54 fitness of MIBC survivors.  
55  
56  
57  
58  
59  
60



## Secondary objective

1. Identifying significant moderators of the intervention effects.

## METHODS

The overall approach of this review is consistent with the methodology described in the Cochrane Handbook for Systematic reviews of Interventions<sup>33</sup> and is described below. Reports of current systematic review protocol adhere to the preferred items for systematic reviews and meta-analysis protocol (PRISMA-P) checklist<sup>34</sup>. The systematic review itself will adhere to the Preferred Reporting Items for Systematic Reviews and Meta-Analyses (PRISMA)<sup>35</sup>.

### Criteria for considering studies for this review

#### Types of studies

Because of the anticipated low amount of randomized controlled trials (RCTs), RCTs and non-randomized studies (NRS) (i.e., cohort studies, case-control studies, cross-sectional studies and quasi-randomized controlled clinical trials (CCTs)) will be considered as appropriate study designs. Results from RCTs and NRS will be presented separately.

#### Types of participants

The population of interest will be adults ( $\geq 18$  years of age) with medically confirmed diagnosis of localized MIBC or high risk NMIBC for whom a radical cystectomy is indicated. Studies with a majority of patients with metastasized BC will be excluded. Demographic factors are no exclusion criteria except for age ( $< 18$  years of age). Studies involving participants with a range of cancers or other diagnoses that report results specifically for patients with MIBC will be included. Studies involving participants with urologic cancers where data is not provided separately for MIBC patients will be excluded.

#### Types of interventions

Exercise-based rehabilitation interventions considered for this review will be aerobic or endurance activities, strength or resistance training, balance exercises, flexibility exercises (with inclusion of yoga and Pilates), exercises specific to address sexual functioning and pelvic floor exercises in case of bladder preserving strategies or bladder reconstruction after radical cystectomy. Generalized advice to engage in regular PA activity will not be considered as an exercise-based rehabilitation intervention. In this review, the focus will be placed on exercise in a planned, structured, repetitive and purposeful rehabilitation intervention. PA as part of playing, working, active transportation, house chores or recreational activities will not be included.

1  
2  
3 Psychosocial rehabilitation interventions eligible for inclusion will be based on the  
4 framework proposed by Buffart et al.: patient education (e.g. stoma management,  
5 generalized advice to engage in PA activity), social support, coping skills training,  
6 psychotherapy and spiritual/existential therapy<sup>17</sup>. Alternative medicine and therapies will  
7 not be included in this review.  
8  
9

10 Both intervention types can either be individual or in group, hospital-based or home-based  
11 (with follow up by a professional), supervised by a physiotherapist or not and can be given  
12 before, during and/or after treatment. No limits will be placed on the timing, frequency,  
13 intensity and duration of rehabilitation interventions. The interventions will be compared  
14 with an inactive control intervention (e.g. no treatment, standard care or a waiting list  
15 control).  
16  
17

### 18 19 Types of outcome measures

20  
21 For both primary and secondary outcome measures, there will be no exclusion based on  
22 length of follow up.  
23

#### 24 25 *Primary outcomes*

26  
27 1. PROs including overall HRQoL, specific HRQoL domains including symptoms such as  
28 fatigue, pain, urinary incontinence, sexual dysfunction, gastro-intestinal dysfunction and  
29 psychological factors such as anxiety, depression, stress and self-esteem. Due to the wide  
30 range of questionnaires used for PROs and the non-consensus of using one standardized  
31 questionnaire, only studies using the standardized and validated measurement instruments  
32 for PRO, found in Table 1<sup>36 37 38 39 40 41 42 43 44 45 46 47 48</sup> will be included. All studies using other  
33 measurement instruments will be excluded, unless proof of their validation can be found in  
34 literature.  
35  
36

37  
38 2. Physical fitness assessed by VO<sub>2</sub> peak, VO<sub>2</sub> max, 6- or 12-minute walk test, 400-m walk  
39 test, handgrip strength tests, sit and reach tests or other proven to be validated instruments.  
40

#### 41 42 *Secondary outcomes*

43  
44 1. Cancer recurrence, cancer-specific survival, progression-free survival, overall survival,  
45 mortality, years of life lost or 5-year survival.  
46

47  
48 2. Body composition assessed by height, weight, body mass index, muscle capacity, fat mass,  
49 lean body mass, thickness of skin folds, body fat, arm circumference, waist circumference,  
50 hip circumference or waist-hip ratio.

51  
52 3. Bone mineral density or fracture risk assessed by fracture risk assessment tool (FRAX)<sup>49</sup>.

53  
54 4. Karnofsky performance score (KPS)<sup>50</sup>.  
55  
56  
57  
58  
59  
60

**Table 1 – standardized and validated measurement instruments for the included patient reported outcomes**

| Patient reported outcome           | Validated measurement instrument                                                                                                                                                                                              |
|------------------------------------|-------------------------------------------------------------------------------------------------------------------------------------------------------------------------------------------------------------------------------|
| <b>HRQOL</b>                       | EQ-5D visual analogue scale, MID: 7 points, SF-36, Ferrans and Powers Quality of Life Index, World Health Organization Quality of Life, SF-12, Padilla QLI, 20-item short form health survey and Satisfaction With Life Scale |
| <b>Cancer specific QOL</b>         | FACT-G, EORTC QLQ-C30, Functional Living Index-Cancer, Selby's QLI, Cleary's QLI and Cancer Rehabilitation Evaluation System –SF                                                                                              |
| <b>Bladder cancer specific QOL</b> | QLQ-BLM30, BCI and FACT-BI                                                                                                                                                                                                    |
| <b>Sexual function</b>             | IIEF-5 and FSFI                                                                                                                                                                                                               |
| <b>Gastro-intestinal function</b>  | GIQLI                                                                                                                                                                                                                         |
| <b>Urinary incontinence</b>        | BCI supplement, ICIQ-UI SF, IPSS                                                                                                                                                                                              |
| <b>Psychological factors</b>       |                                                                                                                                                                                                                               |
| <b>Depression</b>                  | BSI-18, BDI,ISR-depression scale                                                                                                                                                                                              |
| <b>Anxiety</b>                     | STAI anxiety scales, numeric rating scales or visual analogue scale                                                                                                                                                           |
| <b>Stress</b>                      | Perceived Stress Scale                                                                                                                                                                                                        |
| <b>Self-esteem</b>                 | Rosenberg self-esteem scale                                                                                                                                                                                                   |

## Search methods for identification of studies

### Electronic searches

The following electronic databases will be searched from inception until the search date: the Cochrane Central Register of Controlled Trials (CENTRAL), MEDLINE (using the PubMed interface), Embase (using the embase.com interface), Web of Science and the Physiotherapy Evidence Database (PEDro). The search strategies will be evaluated using the PRESS checklist<sup>51</sup> and will be monitored and peer reviewed by an information specialist (NSP). The search strategies are presented in 'Supplementary File 1'.

### Searching other resources

The cited and citing references of the included studies will be checked via Web of Science.

## Data collection and analysis

### Selection of studies

All references found through the search process will be downloaded in a database created by reference management software (Endnote). After removing duplicates in Endnote, all

1  
2  
3 references will be imported into Covidence for screening purposes. Obviously irrelevant  
4 studies, based on title and abstract, will independently be excluded by two review authors  
5 (ER and VF). After screening titles and abstracts, two review authors (ER and VF) will  
6 independently assess full-text reports for eligibility. Discrepancies will be discussed with a  
7 third review author (NS). Reasons for exclusion of full-texts will be documented. Studies will  
8 be excluded if no full-text is available. Abstracts in any other language than English will be  
9 excluded. There will be no language restriction for full texts and translations will be carried  
10 out if necessary. If studies have multiple publications with the same outcome(s) reported,  
11 manuscripts with the longest follow-up will be selected for inclusion. Older publications  
12 referred to in included articles will be accessed to clarify methods if required.

### 16 Data extraction

17  
18  
19 A modified EPOC data collection form of the Cochrane collaboration will be used and pilot  
20 tested with at least three studies in the review<sup>52</sup>. After pilot testing the form, adjustments  
21 can be made. Data extraction will be performed independently by two review authors (ER  
22 and VF). At least following data will be extracted for each study:

- 25 • **General information:** date form completed, name of person extracting data, report  
26 title, report ID, authors' names, source, country, contact address, language of  
27 publication, year of publication.
  - 28 • **Population and setting:** population description (from which study participants are  
29 drawn), setting (e.g. inpatient, outpatient, hospital setting, home setting,  
30 combination), inclusion and exclusion criteria.
  - 31 • **Methods:** aim of study, design, unit of allocation, start and end date, duration of  
32 participation.
  - 33 • **Participants:** number of participants in intervention and control groups, details of  
34 clusters if applicable, baseline imbalances, participant demographics such as sex and  
35 age, disease related characteristics such as stage of disease, received treatment(s)  
36 and comorbidities.
  - 37 • **Intervention:** type of intervention (exercise-based, psychosocial or combination),  
38 details of intervention type (e.g. aerobic, pelvic floor exercises, counseling, patient  
39 education), co-intervention(s), type of control intervention, frequency, duration and  
40 providers of the intervention.
  - 41 • **Outcomes:** outcome name, time points measured and reported, outcome definition,  
42 person measuring/reporting, upper and lower limits of scales, unit measurement if  
43 relevant, if outcome/tool is validated, imputation of missing data and assumed risk  
44 estimate if reported.
  - 45 • **Results:** outcome, measurement effects (please see data analyses below) for  
46 intervention and comparison group, baseline data, number of missing participants  
47 and reasons, and statistical methods used.
- 48  
49  
50  
51  
52  
53  
54  
55  
56  
57  
58  
59  
60

### Assessment of risk of bias in included studies

The Cochrane Collaboration's tool for assessing risk of bias will be used for RCTs. Assessment of risk of bias in NRS will be done using the Newcastle-Ottawa Scale for observational studies. The assessment of risk of bias will be done independently by two reviewers (ER and NSP). Differences will be discussed and a third reviewer (NS) will be consulted when needed. Results will be summarized both in a graph and a narrative summary. In order to evaluate selective reporting, the reviewers will check clinical trial registries or search any protocols of the studies for a priori reported primary and secondary outcome measures. The strength of the body of evidence will be assessed according to the GRADE approach.

### Dealing with missing data

If essential data is not available in the publication, we will first attempt to contact the study authors. If this is not possible, we will try to back-calculate from the data presented. If data will be obtained from other study authors, this will be reported in the review in a transparent manner. This way, we can keep in mind that this missing data obtained from study authors was not peer reviewed. Studies assessing lifestyle interventions may have issues with compliance. Therefore, reasons for missing data (e.g. dropouts, losses to follow-up and withdrawals) will be carefully reported.

### Assessment of heterogeneity

First, there will be a critical consideration of the heterogeneity between the different interventions and outcomes to evaluate whether there is clinical diversity or not. Based on this evaluation, there will be a decision if a meta-analysis can be conducted. When there's no clinical heterogeneity, statistical heterogeneity will be quantified using the  $I^2$  statistic. We will consider the statistical heterogeneity to be high if  $I^2 > 50\%$ . Depending on the heterogeneity of the studies and their results, we will further decide if a meta-analysis can be conducted. We will attempt to explain any observed heterogeneity in the review.

### Assessment of reporting bias

Funnel plots will be used to assess publication bias when ten or more studies are included in a meta-analysis.

### Data synthesis

The findings from the included studies will be summarized descriptively. For dichotomous outcomes, measurement of treatment effect will be reported as risk ratios (RRs) and 95 % confidence intervals (CIs). For continuous outcomes, we will calculate mean differences and 95 % CIs when results are reported on the same scale (or can be converted to the same scale) or standardized mean differences and 95 % CIs if results are reported on different scales.

1  
2  
3 There will be an attempt to identify significant moderators, based on the most important  
4 demographical and clinical characteristics in this population. In order to do this, there will be  
5 a subgroup analysis for age and urinary diversion type. To prevent co-intervention bias,  
6 there will also be a subgroup analysis based on the type of intervention (only exercised-  
7 based interventions, only psychosocial interventions or a combination).  
8  
9

10 When homogeneity of the studies is sufficient, random-effects meta-analysis will be  
11 undertaken separately for each type of study design. Only studies with low risk of bias will be  
12 included in meta-analyses. Therefore, we will perform sensitivity analyses to investigate how  
13 conclusions might be affected if studies at high or unclear risk of bias were included.  
14  
15

## 16 **Ethics and dissemination**

17  
18 Ethics approval is not required, as no primary data will be collected. Results will be  
19 disseminated through a peer-reviewed publication.  
20

21  
22 The scope of this review is broad (i.e., different rehabilitation interventions and study  
23 designs). Although this means that heterogeneity might be present between the studies,  
24 evaluation of different intervention approaches is needed to develop optimal rehabilitation  
25 or survivorship programs. Caution will be present in the interpretation of the results because  
26 of the fact that evidence from RCTs is higher than evidence from NRS. Therefore, the results  
27 derived from RCTs will be seen as the primary evidence. Results from NRS will be seen as  
28 additional evidence to support the results from RCTs.  
29  
30

31  
32 This systematic review has several strengths. First, the overall approach of this review is  
33 consistent with the methodology described in the Cochrane Handbook for Systematic  
34 reviews of Interventions. Secondly, rehabilitation interventions are an innovative topic in the  
35 field of BC so this review ensures an absolute value. A third strength is the fact that MIBC is  
36 an actual problem because of the potentially rising incidence of MIBC due to the aging  
37 population.  
38  
39

40  
41 The results of this systematic review could also have potential limitations in terms of biased  
42 results due to the nature of exercise and psychosocial interventions. It is impossible for such  
43 interventions to blind participants and personnel. Therefore, 'blinding of participants and  
44 personnel' will not be taken into account in the risk of bias assessment because of the  
45 thought that this will not necessarily affect the study quality. On the other hand, attrition  
46 and adherence biases and selective reporting biases are other common concerns around  
47 high risk of bias that would affect the study quality<sup>53</sup>. Therefore, it's important that the risk  
48 of bias assessment will be carried out very carefully. Another limitation of this review could  
49 be the possible paucity of studies meeting the inclusion criteria.  
50  
51  
52

53  
54 In spite of these anticipated limitations, it's important to conduct this review because of the  
55 expected implications for health care, research and survivorship. To date, there are no  
56 specific guidelines for exercise-based or psychosocial rehabilitation interventions for MIBC  
57  
58  
59

1  
2  
3 survivors. This systematic review is expected to provide guidance to the development of  
4 specific guidelines and evidence-based rehabilitation or survivorship programs for MIBC  
5 survivors. Development of such programs could have further implications for health care if  
6 they will be translated into daily clinical practice.  
7

8  
9 By identifying those interventions that have a positive effect on patient outcomes and which  
10 underlying factors ensure the success of such rehabilitation interventions, new interventions  
11 can be developed that can contribute to further research. The positive influence of physical  
12 activity on survivorship is already suggested in different tumor types<sup>54</sup>. The results of this  
13 systematic review can contribute to patient survivorship from the hypothesis that this  
14 positive association is also applicable in MIBC.  
15  
16

#### 17 **Authors' contribution**

18  
19 ER drafted the manuscript and developed the methods and analyses strategy. VF coordinated the process. NSP  
20 and NS aided in developing the search strategy. VF, PO and KD provided uro-oncology specific expertise. RB and  
21 BD gave valuable input concerning rehabilitation.  
22

#### 23 **Funding statement**

24  
25 This study is funded by a grant of *Kom op tegen Kanker*. The granting bodies are not involved in data collection  
26 or analysis.  
27

#### 28 **Competing interests statement**

29  
30 None declared.  
31  
32  
33  
34  
35  
36  
37  
38  
39  
40  
41  
42  
43  
44  
45  
46  
47  
48  
49  
50  
51  
52  
53  
54  
55  
56  
57  
58  
59  
60

## REFERENCES

1. Witjes JA, Compérat E, Cowan NC, et al. EAU Guidelines 2016: Muscle invasive and metastatic bladder cancer. Available from: <https://uroweb.org/guideline/bladder-cancer-muscle-invasive-and-metastatic/>, accessed on 12/10/2016.
2. Burger M, Catto JW, Dalbagni G, et al. Epidemiology and risk factors of urothelial bladder cancer. *European urology* 2013;**63**(2):234-41.
3. Malats N, Real FX. Epidemiology of bladder cancer. *Hematology/oncology clinics of North America* 2015;**29**(2):177-89, vii.
4. Shahrokh FS, Milowsky M, Droller MJ. Bladder cancer in the elderly. *Urologic Oncology: Seminars and Original Investigations* 2009;**27**(6):653-67.
5. Stenzl A, Witjes J, Compérat E, et al. Bladder Cancer Muscle-invasive and Metastatic. UPDATE 2012.
6. van Rhijn BW, Burger M, Lotan Y, et al. Recurrence and progression of disease in non-muscle-invasive bladder cancer: from epidemiology to treatment strategy. *European urology* 2009;**56**(3):430-42.
7. Wright JL, Porter MP. Quality-of-life assessment in patients with bladder cancer. *Nature clinical practice Urology* 2007;**4**(3):147-54.
8. Mohamed N, Gilbert F, Lee C, et al. Pursuing Quality in the Application of Bladder Cancer Quality of Life Research. *Bladder Cancer* 2016;**2**(2):139-49.
9. National Cancer Institute: division of cancer control & population sciences. Available from: <https://cancercontrolcancer.gov/ocs/statistics/definitionshtml>, accessed on 11/10/2016 2016.
10. Hojan K. Contemporary rehabilitation at cancer centres. *Journal of Medical Science* 2016;**83**(2):156-60.
11. Gudbergsson SB, Dahl AA, Loge JH, et al. What is covered by “cancer rehabilitation” in PubMed? A review of randomized controlled trials 1990–2011. *Journal of rehabilitation medicine* 2015;**47**(2):97-106.
12. Weis J, Giesler JM. Rehabilitation for cancer patients. *Psycho-Oncology* 2014:87-101.
13. Harrison JD, Young JM, Price MA, et al. What are the unmet supportive care needs of people with cancer? A systematic review. *Supportive Care in Cancer* 2009;**17**(8):1117-28.
14. McGowan EL, Courneya KS. Exercise interventions in supportive oncology. 2011.
15. World Health Organisation: Global Strategy On Diet, Physical Activity and Health. Available from: <http://www.who.int/dietphysicalactivity/pa/en/>, accessed on 11/10/2016.
16. Parahoo K, McDonough S, McCaughan E, et al. Psychosocial interventions for men with prostate cancer. *The Cochrane Library* 2013.
17. Buffart LM, Kalter J, Chinapaw MJ, et al. Predicting Optimal Cancer Rehabilitation and Supportive care (POLARIS): rationale and design for meta-analyses of individual patient data of randomized controlled trials that evaluate the effect of physical activity and psychosocial interventions on health-related quality of life in cancer survivors. *Systematic reviews* 2013;**2**(1):1.
18. Ferrans CE, Zerwic JJ, Wilbur JE, et al. Conceptual model of health-related quality of life. *Journal of Nursing Scholarship* 2005;**37**(4):336-42.
19. Saban KL, Penckofer SM, Androwich I, et al. Health-related quality of life of patients following selected types of lumbar spinal surgery: A pilot study. *Health and Quality of Life Outcomes* 2007;**5**(1):71.
20. Hacker E. Exercise and quality of life: strengthening the connections. *Clinical journal of oncology nursing* 2009;**13**(1):31.
21. Jensen BT, Jensen JB, Laustsen S, et al. Multidisciplinary rehabilitation can impact on health-related quality of life outcome in radical cystectomy: Secondary reported outcome of a randomized controlled trial. *Journal of multidisciplinary healthcare* 2014;**7**:301-11.



22. Palapattu GS, Haisfield-Wolfe ME, Walker JM, et al. Assessment of perioperative psychological distress in patients undergoing radical cystectomy for bladder cancer. *The Journal of urology* 2004;**172**(5):1814-17.
23. Buffart LM, Kalter J, Sweegers MG, et al. Effects and moderators of exercise on quality of life and physical function in patients with cancer: an individual patient data meta-analysis of 34 RCTs. *Cancer Treatment Reviews* 2016.
24. Alfano CM, Ganz PA, Rowland JH, et al. Cancer survivorship and cancer rehabilitation: revitalizing the link. *Journal of Clinical Oncology* 2012;**30**(9):904-06.
25. Andersen BL. Biobehavioral outcomes following psychological interventions for cancer patients. *Journal of consulting and clinical psychology* 2002;**70**(3):590.
26. Karvinen KH, Courneya KS, Plotnikoff RC, et al. A prospective study of the determinants of exercise in bladder cancer survivors using the theory of planned behavior. *Supportive Care in Cancer* 2009;**17**(2):171.
27. Brown JC, Winters-Stone K, Lee A, et al. Cancer, physical activity, and exercise. *Comprehensive Physiology* 2012.
28. Grabowski JP, Pintus D, Ramesh HS, et al. The Challenges of Treating Cancer in Older Patients—How Effective Are Clinical Trials in Developing Unique Treatments? performance evaluation 2008;**5**:28.
29. Karvinen KH, Courneya KS, Venner P, et al. Exercise programming and counseling preferences in bladder cancer survivors: a population-based study. *Journal of cancer survivorship: research and practice* 2007;**1**(1):27-34.
30. Gopalakrishna A, Longo TA, Fantony JJ, et al. Lifestyle factors and health-related quality of life in bladder cancer survivors: a systematic review. *Journal of Cancer Survivorship* 2016;**10**(5):874-82.
31. Pearson EJ, Twigg VJ. A framework for rehabilitation for cancer survivors. *European journal of cancer care* 2013;**22**(6):701-08.
32. Bultijnck R, Surcel C, Ploussard G, et al. Practice Patterns Compared with Evidence-based Strategies for the Management of Androgen Deprivation Therapy–Induced Side Effects in Prostate Cancer Patients: Results of a European Web-based Survey. *European Urology Focus* 2016.
33. Higgins JPT, (editors) GS. *Cochrane Handbook for Systematic Reviews of Interventions* Version 5.1.0 [updated March 2011]. The Cochrane Collaboration, 2011:Available from [www.handbook.cochrane.org](http://www.handbook.cochrane.org).
34. Shamseer L, Moher D, Clarke M, et al. Preferred reporting items for systematic review and meta-analysis protocols (PRISMA-P) 2015: elaboration and explanation. *Bmj* 2015;**349**:g7647.
35. Moher D, Liberati A, Tetzlaff J, et al. Preferred reporting items for systematic reviews and meta-analyses: the PRISMA statement. *Bmj* 2009;**339**:b2535.
36. Measuring health-related quality of life in men with prostate cancer: A systematic review of the most used questionnaires and their validity. *Urologic Oncology: Seminars and Original Investigations*; 2015. Elsevier.
37. Danna BJ, Metcalfe MJ, Wood EL, et al. Assessing Symptom Burden in Bladder Cancer: An Overview of Bladder Cancer Specific Health-Related Quality of Life Instruments. *Bladder Cancer* 2016;**2**(3):329-40.
38. Vodermaier A, Linden W, Siu C. Screening for emotional distress in cancer patients: a systematic review of assessment instruments. *Journal of the National Cancer Institute* 2009;**101**(21):1464-88.
39. Brandt WA, Loew T, von Heymann F, et al. How does the ICD-10 symptom rating (ISR) with four items assess depression compared to the BDI-II? A validation study. *Journal of affective disorders* 2015;**173**:143-45.
40. Hornblow A, Kidson M-A. The visual analogue scale for anxiety: a validation study. *Australian and New Zealand Journal of Psychiatry* 1976;**10**(4):339-41.

- 1
- 2
- 3 41. Araujo IB, Castelani A, Soler T, et al. Stress assessment in the elderly by the Perceived Stress Scale (PSS). *INTERNATIONAL PSYCHOGERIATRICS* 2015;**27**:S119-S19.
- 4
- 5 42. Li C-C, Chen M-L, Chang T-C, et al. Social support buffers the effect of self-esteem on quality of
- 6 life of early-stage cervical cancer survivors in Taiwan. *European Journal of Oncology Nursing*
- 7 2015;**19**(5):486-94.
- 8 43. Gilbert SM, Dunn RL, Hollenbeck BK, et al. Development and validation of the Bladder Cancer
- 9 Index: a comprehensive, disease specific measure of health related quality of life in patients
- 10 with localized bladder cancer. *The Journal of urology* 2010;**183**(5):1764-70.
- 11 44. Dargis L, Trudel G, Cadieux J, et al. Validation of the International Index of Erectile Function (IIEF)
- 12 and presentation of norms in older men. *Sexologies* 2013;**22**(1):e20-e26.
- 13 45. Baser RE, Li Y, Carter J. Psychometric validation of the Female Sexual Function Index (FSFI) in
- 14 cancer survivors. *Cancer* 2012;**118**(18):4606-18.
- 15 46. Eypasch E, Williams J, Wood-Dauphinee S, et al. Gastrointestinal Quality of Life Index:
- 16 development, validation and application of a new instrument. *British Journal of Surgery*
- 17 1995;**82**(2):216-22.
- 18 47. Hajebrahimi S, Nourizadeh D, Hamedani R, et al. Validity and reliability of the International
- 19 Consultation on Incontinence Questionnaire-Urinary Incontinence Short Form and its
- 20 correlation with urodynamic findings. *Urology journal* 2012;**9**(4):685.
- 21 48. Gray M. Psychometric evaluation of the international prostate symptom score. *Urologic nursing*
- 22 1998;**18**(3):175.
- 23 49. Watts NB, Lewiecki EM, Miller PD, et al. National Osteoporosis Foundation 2008 Clinician's Guide
- 24 to Prevention and Treatment of Osteoporosis and the World Health Organization Fracture
- 25 Risk Assessment Tool (FRAX): what they mean to the bone densitometrist and bone
- 26 technologist. *Journal of Clinical Densitometry* 2008;**11**(4):473-77.
- 27 50. Mor V, Laliberte L, Morris JN, et al. The Karnofsky performance status scale: an examination of its
- 28 reliability and validity in a research setting. *Cancer* 1984;**53**(9):2002-07.
- 29 51. McGowan J, Sampson M, Salzwedel DM, et al. PRESS Peer Review of Electronic Search Strategies:
- 30 2015 Guideline Statement. *Journal of clinical epidemiology* 2016.
- 31 52. Effective Practice and Organisation of Care (EPOC). EPOC Resources for review authors. Oslo:
- 32 Norwegian Knowledge Centre for the Health Services; 2015. Secondary Effective Practice and
- 33 Organisation of Care (EPOC). EPOC Resources for review authors. Oslo: Norwegian
- 34 Knowledge Centre for the Health Services; 2015. [http://epoc.cochrane.org/epoc-specific-](http://epoc.cochrane.org/epoc-specific-resources-review-authors)
- 35 [resources-review-authors.](http://epoc.cochrane.org/epoc-specific-resources-review-authors)
- 36 53. Bourke L, Smith D, Steed L, et al. Exercise for men with prostate cancer: a systematic review and
- 37 meta-analysis. *European urology* 2016;**69**(4):693-703.
- 38 54. Ammitzboll G, Sogaard K, Karlsen RV, et al. Physical activity and survival in breast cancer.
- 39 *European journal of cancer (Oxford, England : 1990)* 2016;**66**:67-74.
- 40
- 41
- 42
- 43
- 44
- 45
- 46
- 47
- 48
- 49
- 50
- 51
- 52
- 53
- 54
- 55
- 56
- 57
- 58
- 59
- 60

1  
2  
3  
4  
5  
6  
7  
8  
9  
10  
11  
12  
13  
14  
15  
16  
17  
18  
19  
20  
21  
22  
23  
24  
25  
26  
27  
28  
29  
30  
31  
32  
33  
34  
35  
36  
37  
38  
39  
40  
41  
42  
43  
44  
45  
46

| Search Strategy                                              |                    |                                                                                                                                                                                                                                                                                                                                                                                                                                                                                                                                                                                                                                                                                                                                                                                                                                                                                                                                                                                                                                                                                                                                                                                                                                                                                                                                                                                                                                                                                                                                                                                                                                                                                                                                                                                                                                                                                                                                                                                                                                                                                                                                                                                                                                                                                                                                                                                                                                                                                                                                                                                                                                                                                                                                                                                                                                                                                                                                                                                                                                                                                                                                                                                                                                                                                                                                                                                                                                                                                                                                                           |
|--------------------------------------------------------------|--------------------|-----------------------------------------------------------------------------------------------------------------------------------------------------------------------------------------------------------------------------------------------------------------------------------------------------------------------------------------------------------------------------------------------------------------------------------------------------------------------------------------------------------------------------------------------------------------------------------------------------------------------------------------------------------------------------------------------------------------------------------------------------------------------------------------------------------------------------------------------------------------------------------------------------------------------------------------------------------------------------------------------------------------------------------------------------------------------------------------------------------------------------------------------------------------------------------------------------------------------------------------------------------------------------------------------------------------------------------------------------------------------------------------------------------------------------------------------------------------------------------------------------------------------------------------------------------------------------------------------------------------------------------------------------------------------------------------------------------------------------------------------------------------------------------------------------------------------------------------------------------------------------------------------------------------------------------------------------------------------------------------------------------------------------------------------------------------------------------------------------------------------------------------------------------------------------------------------------------------------------------------------------------------------------------------------------------------------------------------------------------------------------------------------------------------------------------------------------------------------------------------------------------------------------------------------------------------------------------------------------------------------------------------------------------------------------------------------------------------------------------------------------------------------------------------------------------------------------------------------------------------------------------------------------------------------------------------------------------------------------------------------------------------------------------------------------------------------------------------------------------------------------------------------------------------------------------------------------------------------------------------------------------------------------------------------------------------------------------------------------------------------------------------------------------------------------------------------------------------------------------------------------------------------------------------------------------|
| Database                                                     | Data last searched | Search Syntax                                                                                                                                                                                                                                                                                                                                                                                                                                                                                                                                                                                                                                                                                                                                                                                                                                                                                                                                                                                                                                                                                                                                                                                                                                                                                                                                                                                                                                                                                                                                                                                                                                                                                                                                                                                                                                                                                                                                                                                                                                                                                                                                                                                                                                                                                                                                                                                                                                                                                                                                                                                                                                                                                                                                                                                                                                                                                                                                                                                                                                                                                                                                                                                                                                                                                                                                                                                                                                                                                                                                             |
| The Cochrane Central Register of Controlled Trials (CENTRAL) | 13/12/2016         | <ol style="list-style-type: none"> <li>[mh "Urinary Bladder Neoplasms"] OR [mh "Carcinoma, Transitional Cell"] OR ("bladder cancer"):ti,ab,kw OR ("bladder carcinoma"):ti,ab,kw OR ("bladder malignancy"):ti,ab,kw OR ("bladder neoplasm"):ti,ab,kw OR ("bladder tumor"):ti,ab,kw OR ("transitional cell carcinoma"):ti,ab,kw OR ("transitional cell cancer"):ti,ab,kw OR ("transitional cell malignancies"):ti,ab,kw OR ("transitional cell tumor"):ti,ab,kw OR ("urothelial cancer"):ti,ab,kw OR ("urothelial carcinoma"):ti,ab,kw OR ("urothelial malignancy"):ti,ab,kw OR ("urothelial tumor"):ti,ab,kw OR ("urinary tract carcinoma"):ti,ab,kw OR ("urinary tract cancer"):ti,ab,kw OR ("urinary tract malignancy"):ti,ab,kw OR ("urinary tract tumor"):ti,ab,kw</li> <li>[mh "exercise"] OR [mh "Exercise Movement Techniques"] OR [mh "Sports"] OR [mh "Physical Fitness"] OR [mh "Physical Exertion"] OR [mh "Exercise Therapy"] OR [mh "Dance Therapy"] OR [mh "Recreation Therapy"] OR [mh "Rehabilitation, Vocational"] OR [mh "Telerehabilitation"] OR [mh "Occupational Therapy"] OR [mh "Self Care"] OR [mh "Urinary Incontinence/rehabilitation"] OR [mh "Pelvic Floor/therapy"] OR ("self care"):ti,ab,kw OR (exercise):ti,ab,kw OR (sport):ti,ab,kw OR ("physical activity"):ti,ab,kw OR (physiotherapy):ti,ab,kw OR (kinesiotherapy):ti,ab,kw OR ("physical conditioning"):ti,ab,kw OR ("physical education"):ti,ab,kw OR ("physical fitness"):ti,ab,kw OR (running):ti,ab,kw OR (swimming) :ti,ab,kw OR (walking):ti,ab,kw OR (jogging):ti,ab,kw OR ("weight lifting"):ti,ab,kw OR (dance):ti,ab,kw OR ("tai chi"):ti,ab,kw OR (yoga):ti,ab,kw OR (pilates):ti,ab,kw OR (gymnastic):ti,ab,kw OR ("resistance training"):ti,ab,kw OR ("aerobic training"):ti,ab,kw OR ("anaerobic training"):ti,ab,kw OR ("muscle training"):ti,ab,kw OR (stretching):ti,ab,kw OR (aerobic):ti,ab,kw OR (rehabilitation):ti,ab,kw OR ("pre-rehabilitation"):ti,ab,kw OR (prehabilitation):ti,ab,kw OR (aquagym):ti,ab,kw OR (football) :ti,ab,kw OR (soccer):ti,ab,kw OR ("circuit training"):ti,ab,kw OR (fitness):ti,ab,kw OR ("bladder training"):ti,ab,kw OR ("incontinence management"):ti,ab,kw OR ("urinary management"):ti,ab,kw</li> <li>[mh "Tertiary Prevention"] OR [mh "Social Support"] OR [mh "Psychiatric Rehabilitation"] OR [mh "Health Promotion"] OR [mh "Psychotherapy"] OR [mh "Counseling"] OR [mh "Patient Education as Topic"] OR [mh "Sex Education"] OR [mh "Sexuality/rehabilitation"] OR [mh "Health Literacy"] OR [mh "psychology/education"] OR [mh "psychology/therapy"] OR [mh "Problem Solving"] OR [mh "Mind-body therapies"] OR [mh "patient participation"] OR [mh "Existentialism"] OR [mh "spiritual therapies"] OR [mh "problem-based learning"] OR [mh "Sedentary Lifestyle"] OR ("psychosocial intervention"):ti,ab,kw OR ("psychologic intervention"):ti,ab,kw OR ("psychological intervention"):ti,ab,kw OR ("psychology intervention"):ti,ab,kw OR ("social intervention"):ti,ab,kw OR ("psychosocial therapy"):ti,ab,kw OR ("psychologic therapy"):ti,ab,kw OR ("psychological therapy"):ti,ab,kw OR ("psychology therapies"):ti,ab,kw OR (psychotherapy):ti,ab,kw OR ("tertiary health care"):ti,ab,kw OR ("tertiary prevention"):ti,ab,kw OR ("social support"):ti,ab,kw OR ("social behavior"):ti,ab,kw OR ("support care"):ti,ab,kw OR ("supportive care"):ti,ab,kw OR ("behavior treatment"):ti,ab,kw OR ("behavior therapy"):ti,ab,kw OR ("cognitive treatment"):ti,ab,kw OR ("cognitive</li> </ol> |

therapy):ti,ab,kw OR (counseling):ti,ab,kw OR ("patient education"):ti,ab,kw OR ("patient participation"):ti,ab,kw OR ("health education"):ti,ab,kw OR ("sex education"):ti,ab,kw OR ("sexual education"):ti,ab,kw OR (psychoeducation):ti,ab,kw OR ("sex therapy"):ti,ab,kw OR ("sexual therapy"):ti,ab,kw OR ("stoma education"):ti,ab,kw OR ("stoma therapy"):ti,ab,kw OR ("health literacy"):ti,ab,kw OR ("health promotion"):ti,ab,kw OR ("health behavior"):ti,ab,kw OR ("cognitive behavior"):ti,ab,kw OR ("behavior training"):ti,ab,kw OR ("behavioral training"):ti,ab,kw OR (CBT) OR ("complementary therapy"):ti,ab,kw OR ("mind body therapy"):ti,ab,kw OR ("spiritual therapy"):ti,ab,kw OR ("relaxation therapy"):ti,ab,kw OR ("relaxation training"):ti,ab,kw OR ("client centered therapy"):ti,ab,kw OR (conditioning):ti,ab,kw OR ("stoma management"):ti,ab,kw OR ("bowel management"):ti,ab,kw OR (coping):ti,ab,kw OR (mindfulness):ti,ab,kw OR (empowerment):ti,ab,kw OR ("self-monitoring"):ti,ab,kw OR ("motivation therapy"):ti,ab,kw OR ("motivational therapy"):ti,ab,kw OR ("motivation interviewing"):ti,ab,kw OR ("motivational interviewing"):ti,ab,kw OR ("motivation treatment"):ti,ab,kw OR ("motivational treatment"):ti,ab,kw OR (psychology):ti,ab,kw OR ("problem solving"):ti,ab,kw OR ("psychosocial care"):ti,ab,kw OR ("psychological care"):ti,ab,kw OR ("psychologic care"):ti,ab,kw OR ("caregiver support"):ti,ab,kw OR (sociotherapy):ti,ab,kw OR ("occupational therapy"):ti,ab,kw OR ("care delivery"):ti,ab,kw OR ("functional therapy"):ti,ab,kw OR ("functional training"):ti,ab,kw OR (existentialism):ti,ab,kw OR ("spiritual healing"):ti,ab,kw OR ("spiritual therapy"):ti,ab,kw OR ("transcultural care"):ti,ab,kw OR ("life style"):ti,ab,kw

4. 2 OR 3

5. 1 AND 4

MEDLINE (via PubMed interface) 13/12/2016

1. "Urinary Bladder Neoplasms"[MESH] OR "Urinary Bladder/abnormalities"[MESH] OR "Urinary bladder/surgery"[MESH] OR "Carcinoma, Transitional Cell"[Mesh] OR "bladder cancer"[TIAB] OR "bladder cancers"[TIAB] OR "bladder carcinoma"[TIAB] OR "bladder carcinomas"[TIAB] OR "bladder malignancy"[TIAB] OR "bladder malignancies"[TIAB] OR "bladder neoplasm"[TIAB] OR "bladder neoplasms"[TIAB] OR "bladder tumor"[TIAB] OR "bladder tumors"[TIAB] OR "bladder tumour"[TIAB] OR "bladder tumours"[TIAB] OR "transitional cell carcinoma"[TIAB] OR "transitional cell carcinomas"[TIAB] OR "transitional cell cancer"[TIAB] OR "transitional cell cancers"[TIAB] OR "transitional cell malignancies"[TIAB] OR "transitional cell tumor"[TIAB] OR "transitional cell tumors"[TIAB] OR "transitional cell tumour"[TIAB] OR "transitional cell tumours"[TIAB] OR "urothelial cancer"[TIAB] OR "urothelial cancers"[TIAB] OR "urothelial carcinoma"[TIAB] OR "urothelial carcinomas"[TIAB] OR "urothelial malignancy"[TIAB] OR "urothelial malignancies"[TIAB] OR "urothelial tumor"[TIAB] OR "urothelial tumors"[TIAB] OR "urothelial tumour"[TIAB] OR "urothelial tumours"[TIAB] OR "urinary tract carcinoma"[TIAB] OR "urinary tract carcinomas"[TIAB] OR "urinary tract cancer"[TIAB] OR "urinary tract cancers"[TIAB] OR "urinary tract malignancy"[TIAB] OR "urinary tract malignancies"[TIAB] OR "urinary tract tumor"[TIAB] OR "urinary tract tumors"[TIAB] OR "urinary tract tumour"[TIAB] OR "urinary tract tumours"[TIAB]
2. "exercise"[MESH] OR "Exercise Movement Techniques"[Mesh] OR "Sports"[Mesh] OR "Physical Fitness"[Mesh] OR "Physical Exertion"[Mesh] OR "Exercise Therapy"[Mesh] OR "Dance Therapy"[Mesh] OR "Recreation Therapy"[Mesh] OR "Rehabilitation, Vocational"[Mesh] OR "Telerehabilitation"[Mesh] OR "Occupational Therapy"[Mesh] OR "Self Care"[Mesh] OR "Urinary Incontinence/rehabilitation"[Mesh] OR "Pelvic Floor/therapy"[Mesh] OR "self care"[TIAB] OR

- 1  
2  
3  
4  
5  
6  
7  
8  
9  
10  
11  
12  
13  
14  
15  
16  
17  
18  
19  
20  
21  
22  
23  
24  
25  
26  
27  
28  
29  
30  
31  
32  
33  
34  
35  
36  
37  
38  
39  
40  
41  
42  
43  
44  
45  
46
- “exercise”[TIAB] OR “exercising”[TIAB] OR “exercises”[TIAB] OR “sport”[TIAB] OR “sports”[TIAB] OR “physical activity”[TIAB] OR “physical activities”[TIAB] OR “physiotherapy”[TIAB] OR “kinesiotherapy”[TIAB] OR “physical conditioning”[TIAB] OR physical education\*[TIAB] OR “physical fitness”[TIAB] OR “running”[TIAB] OR “swimming”[TIAB] OR “walking”[TIAB] OR “jogging”[TIAB] OR “weight lifting”[TIAB] OR “dancing”[TIAB] OR “dance”[TIAB] OR “tai chi”[TIAB] OR “tai ji”[TIAB] OR “yoga”[TIAB] OR “pilates”[TIAB] OR “gymnastic”[TIAB] OR “gymnastics”[TIAB] OR “resistance training”[TIAB] OR “aerobic training”[TIAB] OR “anaerobic training”[TIAB] OR “muscle training”[TIAB] OR “stretching”[TIAB] OR “aerobic”[TIAB] OR “aerobics”[TIAB] OR “rehabilitation”[TIAB] OR “pre-habilitation”[TIAB] OR “prehabilitation”[TIAB] OR “aquagym”[TIAB] OR “football”[TIAB] OR “soccer”[TIAB] OR “circuit training”[TIAB] OR “fitness”[TIAB] OR “bladder training”[TIAB] OR “incontinence management”[TIAB] OR “urinary management”[TIAB]
3. "Tertiary Prevention"[Mesh] OR "Social Support"[Mesh] OR "Psychiatric Rehabilitation"[Mesh] OR "Health Promotion"[Mesh] OR "Psychotherapy"[Mesh] OR "Counseling"[Mesh] OR "Patient Education as Topic"[Mesh] OR "Sex Education"[Mesh] OR "Sexuality/rehabilitation"[Mesh] OR "Health Literacy"[Mesh] OR "psychology/education"[MESH] OR "psychology/therapy"[MESH] OR "Problem Solving"[MESH] OR "Mind-body therapies"[Mesh] OR "patient participation"[MESH] OR "Existentialism"[MESH] OR "spiritual therapies"[MESH] OR "problem-based learning"[MESH] OR "Sedentary Lifestyle"[Mesh] OR psychosocial intervention\*[TIAB] OR psychologic intervention\*[TIAB] OR psychological intervention\*[TIAB] OR psychology intervention\*[TIAB] OR social intervention\*[TIAB] OR psychosocial therap\*[TIAB] OR psychologic therap\*[TIAB] OR "psychological therapy"[TIAB] OR "psychological therapies"[TIAB] OR "psychology therapies"[TIAB] OR "psychotherapy"[TIAB] OR "tertiary health care"[TIAB] OR "tertiary prevention"[TIAB] OR "social support"[TIAB] OR social behav\*[TIAB] OR "support care"[TIAB] OR "supportive care"[TIAB] OR behavior treatment\*[TIAB] OR behavioral treatment\*[TIAB] OR behavior therap\*[TIAB] OR behavioral therap\*[TIAB] OR cognitive treatment\*[TIAB] OR cognitive therap\*[TIAB] OR "counseling"[TIAB] OR patient education\*[TIAB] OR "patient participation"[TIAB] OR health education\*[TIAB] OR sex education\*[TIAB] OR sexual education\*[TIAB] OR psychoeducation\*[TIAB] OR sex therap\*[TIAB] OR sexual therap\*[TIAB] OR stoma education\*[TIAB] OR stoma therap\*[TIAB] OR health literac\*[TIAB] OR health promotion\*[TIAB] OR health behavio\*[TIAB] OR "cognitive behavior"[TIAB] OR "behavior training"[TIAB] OR "behavioral training"[TIAB] OR "behavioural training"[TIAB] OR CBT[TIAB] OR complementary therap\*[TIAB] OR mind body therap\*[TIAB] OR spiritual therap\*[TIAB] OR relaxation therap\*[TIAB] OR "relaxation training"[TIAB] OR client centered therap\*[TIAB] OR conditioning[TIAB] OR stoma management[TIAB] OR bowel management[TIAB] OR coping [TIAB] OR mindfulness[TIAB] OR empowerment[TIAB] OR empowering[TIAB] OR self-monitoring\*[TIAB] OR motivation therap\*[TIAB] OR motivational therap\*[TIAB] OR motivation interview[TIAB] OR motivation interviewing[TIAB] OR motivational interview[TIAB] OR motivational interviewing[TIAB] OR motivation treatment\*[TIAB] OR motivational treatment\*[TIAB] OR psychology[TIAB] OR problem solv\*[TIAB] OR "psychosocial care"[TIAB] OR "psychological care"[TIAB] OR "psychologic care"[TIAB] OR caregiver support\*[TIAB] OR sociotherap\*[TIAB] OR occupational therap\*[TIAB] OR care deliver\*[TIAB] OR functional therap\*[TIAB] OR "functional training"[TIAB] OR existentialism[TIAB] OR "spiritual healing"[TIAB] OR spiritual therap\*[TIAB] OR "transcultural care"[TIAB] OR "life style"[TIAB]
4. 2 OR 3

|                                   |            |                                                                                                                                                                                                                                                                                                                                                                                                                                                                                                                                                                                                                                                                                                                                                                                                                                                                                                                                                                                                                                                                                                                                                                                                                                                                                                                                                                                                                                                                                                                                                                                                                                                                                                                                                                                                                                                                                                                                                                                                                                                                                                                                                                                                                                                                                                                                                                                                                                                                                                                                                                                                                                                                                                                                                                                                                                                                                                                                                                                                                                                                                                                                                                                                                                                                                                                                                                                                                                                                                                                                                                                                                                                                                                                                                                                                                                                                                                                                                                                                                                                                                                                                                                                                                                                                                                                                                                                               |
|-----------------------------------|------------|-----------------------------------------------------------------------------------------------------------------------------------------------------------------------------------------------------------------------------------------------------------------------------------------------------------------------------------------------------------------------------------------------------------------------------------------------------------------------------------------------------------------------------------------------------------------------------------------------------------------------------------------------------------------------------------------------------------------------------------------------------------------------------------------------------------------------------------------------------------------------------------------------------------------------------------------------------------------------------------------------------------------------------------------------------------------------------------------------------------------------------------------------------------------------------------------------------------------------------------------------------------------------------------------------------------------------------------------------------------------------------------------------------------------------------------------------------------------------------------------------------------------------------------------------------------------------------------------------------------------------------------------------------------------------------------------------------------------------------------------------------------------------------------------------------------------------------------------------------------------------------------------------------------------------------------------------------------------------------------------------------------------------------------------------------------------------------------------------------------------------------------------------------------------------------------------------------------------------------------------------------------------------------------------------------------------------------------------------------------------------------------------------------------------------------------------------------------------------------------------------------------------------------------------------------------------------------------------------------------------------------------------------------------------------------------------------------------------------------------------------------------------------------------------------------------------------------------------------------------------------------------------------------------------------------------------------------------------------------------------------------------------------------------------------------------------------------------------------------------------------------------------------------------------------------------------------------------------------------------------------------------------------------------------------------------------------------------------------------------------------------------------------------------------------------------------------------------------------------------------------------------------------------------------------------------------------------------------------------------------------------------------------------------------------------------------------------------------------------------------------------------------------------------------------------------------------------------------------------------------------------------------------------------------------------------------------------------------------------------------------------------------------------------------------------------------------------------------------------------------------------------------------------------------------------------------------------------------------------------------------------------------------------------------------------------------------------------------------------------------------------------------------|
|                                   |            | 5. 1 AND 4                                                                                                                                                                                                                                                                                                                                                                                                                                                                                                                                                                                                                                                                                                                                                                                                                                                                                                                                                                                                                                                                                                                                                                                                                                                                                                                                                                                                                                                                                                                                                                                                                                                                                                                                                                                                                                                                                                                                                                                                                                                                                                                                                                                                                                                                                                                                                                                                                                                                                                                                                                                                                                                                                                                                                                                                                                                                                                                                                                                                                                                                                                                                                                                                                                                                                                                                                                                                                                                                                                                                                                                                                                                                                                                                                                                                                                                                                                                                                                                                                                                                                                                                                                                                                                                                                                                                                                                    |
| EMBASE (via Embase.com interface) | 13/12/2016 | <p>1. 'bladder tumor'/exp OR 'urinary tract carcinoma'/exp OR 'bladder surgery'/exp OR 'transitional cell carcinoma'/exp OR 'bladder cancer':ab,ti OR 'bladder cancers':ab,ti OR 'bladder carcinoma':ab,ti OR 'bladder carcinomas':ab,ti OR 'bladder malignancy':ab,ti OR 'bladder malignancies':ab,ti OR 'bladder neoplasm':ab,ti OR 'bladder neoplasms':ab,ti OR 'bladder tumor':ab,ti OR 'bladder tumors':ab,ti OR 'bladder tumour':ab,ti OR 'bladder tumours':ab,ti OR 'transitional cell carcinoma':ab,ti OR 'transitional cell carcinomas':ab,ti OR 'transitional cell cancer':ab,ti OR 'transitional cell cancers':ab,ti OR 'transitional cell malignancies':ab,ti OR 'transitional cell tumor':ab,ti OR 'transitional cell tumors':ab,ti OR 'transitional cell tumour':ab,ti OR 'transitional cell tumours':ab,ti OR 'urothelial cancer':ab,ti OR 'urothelial cancers':ab,ti OR 'urothelial carcinoma':ab,ti OR 'urothelial carcinomas':ab,ti OR 'urothelial malignancy':ab,ti OR 'urothelial malignancies':ab,ti OR 'urothelial tumor':ab,ti OR 'urothelial tumors':ab,ti OR 'urothelial tumour':ab,ti OR 'urothelial tumours':ab,ti OR 'urinary tract carcinoma':ti,ab OR 'urinary tract carcinomas':ti,ab OR 'urinary tract cancer':ti,ab OR 'urinary tract cancers':ti,ab OR 'urinary tract malignance':ti,ab OR 'urinary tract malignancy':ti,ab OR 'urinary tract malignancies':ti,ab OR 'urinary tract tumor':ti,ab OR 'urinary tract tumors':ti,ab OR 'urinary tract tumour':ti,ab OR 'urinary tract tumours':ti,ab</p> <p>2. 'physical activity'/exp OR 'exercise'/exp OR 'physiotherapy'/exp OR 'kinesiotherapy'/exp OR 'fitness'/exp OR 'sport'/exp OR 'bladder training'/exp OR 'cancer rehabilitation'/exp OR 'cognitive rehabilitation'/exp OR 'functional training'/exp OR 'geriatric rehabilitation'/exp OR 'muscle training'/exp OR 'home rehabilitation'/exp OR 'occupational therapy'/exp OR 'pelvic floor muscle training'/exp OR 'self care':ab,ti OR 'exercise':ab,ti OR 'exercising':ab,ti OR 'exercises':ab,ti OR 'sport':ab,ti OR 'sports':ab,ti OR 'physical activity':ab,ti OR 'physical activities':ab,ti OR 'physiotherapy':ab,ti OR 'kinesiotherapy':ab,ti OR 'physical conditioning':ab,ti OR 'physical education*':ab,ti OR 'physical fitness':ab,ti OR 'running':ab,ti OR 'swimming':ab,ti OR 'walking':ab,ti OR 'jogging':ab,ti OR 'weight lifting':ab,ti OR 'dancing':ab,ti OR 'dance':ab,ti OR 'tai chi':ab,ti OR 'tai ji':ab,ti OR 'yoga':ab,ti OR 'pilates':ab,ti OR 'gymnastic':ab,ti OR 'gymnastics':ab,ti OR 'resistance training':ab,ti OR 'aerobic training':ab,ti OR 'anaerobic training':ab,ti OR 'muscle training':ab,ti OR 'stretching':ab,ti OR 'aerobic':ab,ti OR 'aerobics':ab,ti OR 'rehabilitation':ab,ti OR 'pre-habilitation':ab,ti OR 'prehabilitation':ab,ti OR 'aquagym':ab,ti OR 'football':ab,ti OR 'soccer':ab,ti OR 'circuit training':ab,ti OR 'fitness':ab,ti OR 'bladder training':ab,ti OR 'incontinence management':ab,ti OR 'urinary management':ab,ti</p> <p>3. 'psychosocial rehabilitation'/exp OR 'recreational therapy'/exp OR 'sociotherapy'/exp OR 'telerehabilitation'/exp OR 'vocational rehabilitation'/exp OR 'caregiver support'/exp OR 'psychosocial care'/exp OR 'social support'/exp OR 'spiritual care'/exp OR 'psychotherapy'/exp OR 'preoperative education'/exp OR 'psychoeducation'/exp OR 'patient education'/exp OR 'health promotion'/exp OR 'reinforcement'/exp OR 'patient participation'/exp OR 'counseling'/exp OR 'problem solving'/exp OR 'home physiotherapy'/exp OR 'cancer prevention'/exp OR 'learning'/exp OR 'rehabilitation care'/exp OR 'bladder and bowel management'/exp OR 'empowerment'/exp OR 'coping behavior'/exp OR 'social interaction'/exp OR 'social participation'/exp OR 'behavior change'/exp OR 'lifestyle'/exp OR 'psychosocial intervention*':ab,ti OR 'psychologic intervention*':ab,ti OR 'psychological intervention*':ab,ti OR 'psychology intervention*':ab,ti OR 'social intervention*':ab,ti OR 'psychosocial therap*':ab,ti OR 'psychologic therap*':ab,ti OR 'psychological therapy':ab,ti OR 'psychological therapies':ab,ti OR 'psychology therapies':ab,ti OR 'psychotherapy':ab,ti OR 'tertiary health care':ab,ti OR 'tertiary prevention':ab,ti OR 'social support':ab,ti OR 'social behav*':ab,ti OR 'support care':ab,ti OR 'supportive</p> |

care':ab,ti OR 'behavior treatment\*':ab,ti OR 'behavioral treatment\*':ab,ti OR 'behavior therap\*':ab,ti OR 'behavioral therap\*':ab,ti OR 'cognitive treatment\*':ab,ti OR 'cognitive therap\*':ab,ti OR 'counseling':ab,ti OR 'patient education\*':ab,ti OR 'patient participation':ab,ti OR 'health education\*':ab,ti OR 'sex education\*':ab,ti OR 'sexual education\*':ab,ti OR 'psychoeducation\*':ab,ti OR 'sex therap\*':ab,ti OR 'sexual therap\*':ab,ti OR 'stoma education\*':ab,ti OR 'stoma therap\*':ab,ti OR 'health literac\*':ab,ti OR 'health promotion\*':ab,ti OR 'health behavio\*':ab,ti OR 'cognitive behavior':ab,ti OR 'behavior training':ab,ti OR 'behavioral training':ab,ti OR 'behavioural training':ab,ti OR 'CBT':ab,ti OR 'complementary therap\*':ab,ti OR 'mind body therap\*':ab,ti OR 'spiritual therap\*':ab,ti OR 'relaxation therap\*':ab,ti OR 'relaxation training':ab,ti OR 'client centered therap\*':ab,ti OR 'conditioning':ab,ti OR 'stoma management':ab,ti OR 'bowel management':ab,ti OR 'coping':ab,ti OR 'mindfulness':ab,ti OR 'empowerment':ab,ti OR 'empowering':ab,ti OR 'self-monitoring\*':ab,ti OR 'motivation therap\*':ab,ti OR 'motivational therap\*':ab,ti OR 'motivation interview':ab,ti OR 'motivation interviewing':ab,ti OR 'motivational interview':ab,ti OR 'motivational interviewing':ab,ti OR 'motivation treatment\*':ab,ti OR 'motivational treatment\*':ab,ti OR 'psychology':ab,ti OR 'problem solv\*':ab,ti OR 'psychosocial care':ab,ti OR 'psychological care':ab,ti OR 'psychologic care':ab,ti OR 'caregiver support\*':ab,ti OR 'sociotherap\*':ab,ti OR 'occupational therap\*':ab,ti OR 'care deliver\*':ab,ti OR 'functional therap\*':ab,ti OR 'functional training':ab,ti OR 'existentialism':ab,ti OR 'spiritual healing':ab,ti OR 'spiritual therap\*':ab,ti OR 'transcultural care':ab,ti OR 'life style':ab,ti

4. 2 OR 3

5. 1 AND 4

Web of Science

13/12/2016

1. TS=("bladder cancer") OR TS=("bladder cancers") OR TS=("bladder carcinoma") OR TS=("bladder carcinomas") OR TS=("bladder malignancy") OR TS=("bladder malignancies") OR TS=("bladder neoplasm") OR TS=("bladder neoplasms") OR TS=("bladder tumor") OR TS=("bladder tumors")OR TS=("bladder tumour") OR TS=("bladder tumours") OR TS=("transitional cell carcinoma") OR TS=("transitional cell carcinomas") OR TS=("transitional cell cancer") OR TS=("transitional cell cancers") OR TS=("transitional cell malignancies") OR TS=("transitional cell tumor") OR TS=("transitional cell tumors") OR TS=("transitional cell tumour") OR TS=("transitional cell tumours") OR TS=("urothelial cancer") OR TS=("urothelial cancers") OR TS=("urothelial carcinoma") OR TS=("urothelial carcinomas")OR TS=("urothelial malignancy") OR TS=("urothelial malignancies") OR TS=("urothelial tumor") OR TS=("urothelial tumors")OR TS=("urothelial tumour") OR TS=("urothelial tumours") OR TS=("urinary tract carcinoma") OR TS=("urinary tract carcinomas") OR TS=("urinary tract cancer") OR TS=("urinary tract cancers") OR TS=("urinary tract malignancy") OR TS=("urinary tract malignancies") OR TS=("urinary tract tumor") OR TS=("urinary tract tumors") OR TS=("urinary tract tumour") OR TS=("urinary tract tumours")
2. TS=("self care") OR TS=(exercise) OR TS=(exercising) OR TS=(exercises) OR TS=(sport) OR TS=(sports) OR TS=("physical activity") OR TS=("physical activities") OR TS=(physiotherapy) OR TS=(kinesiotherapy) OR TS=("physical conditioning") OR TS=("physical education\*") OR TS=("physical fitness") OR TS=(running) OR TS=(swimming) OR TS=(walking) OR TS=(jogging) OR TS=("weight lifting") OR TS=(dancing) OR TS=(dance) OR TS=("tai chi") OR TS=("tai ji") OR TS=(yoga) OR TS=(pilates) OR TS=(gymnastic) OR TS=(gymnastics) OR TS=("resistance training") OR TS=("aerobic training") OR TS=("anaerobic training") OR TS=("muscle training") OR TS=(stretching) OR TS=(aerobic) OR TS=(aerobics) OR TS=(rehabilitation) OR TS=("pre-habilitation") OR TS=(prehabilitation) OR TS=(aquagym) OR TS=(football) OR TS=(soccer)

- OR TS=("circuit training") OR TS=(fitness) OR TS=("bladder training") OR TS=("incontinence management") OR TS=("urinary management")
3. TS=("psychosocial intervention\*")OR TS=("psychologic intervention\*") OR TS=("psychological intervention\*")OR TS=("psychology intervention\*")OR TS=("social intervention\*") OR TS=("psychosocial therap\*")OR TS=("psychologic therap\*")OR TS=("psychological therapy")OR TS=("psychological therapies") OR TS=("psychology therapies") OR TS=(psychotherapy) OR TS=("tertiary health care") OR TS=("tertiary prevention") OR TS=("social support") OR TS=("social behav\*") OR TS=("support care") OR TS=("supportive care") OR TS=("behavior treatment\*") OR TS=("behavioral treatment\*")OR TS=("behavior therap\*")OR TS=("behavioral therap\*") OR TS=("cognitive treatment\*") OR TS=("cognitive therap\*") OR TS=(counseling) OR TS=("patient education\*")OR TS=("patient participation")OR TS=("health education\*")OR TS=("sex education\*") OR TS=("sexual education\*")OR TS=(psychoeducation\*)OR TS=("sex therap\*")OR TS=("sexual therap\*") OR TS=("stoma education\*")OR TS=("stoma therap\*")OR TS=("health literac\*") OR TS=("health promotion\*")OR TS=("health behavio\*") OR TS=("cognitive behavior") OR TS=("behavior training") OR TS=("behavioral training") OR TS=("behavioural training") OR TS=(CBT) OR TS=("complementary therap\*")OR TS=("mind body therap\*")OR TS=("spiritual therap\*")OR TS=("relaxation therap\*")OR TS=("relaxation training") OR TS=("client centered therap\*")OR TS=(conditioning)OR TS=("stoma management")OR TS=("bowel management") OR TS=(coping) OR TS=(mindfulness)OR TS=(empowerment) OR TS=(empowering) OR TS=("self-monitoring\*")OR TS=("motivation therap\*")OR TS=("motivational therap\*")OR TS=("motivation interview") OR TS=("motivation interviewing") OR TS=("motivational interview") OR TS=("motivational interviewing") OR TS=("motivation treatment\*")OR TS=("motivational treatment\*")OR TS=(psychology)OR TS=("problem solv\*")OR TS=("psychosocial care")OR TS=("psychological care")OR TS=("psychologic care")OR TS=("caregiver support\*")OR TS=(sociotherap\*) OR TS=("occupational therap\*") OR TS=("care deliver\*")OR TS=("functional therap\*")OR TS=("functional training") OR TS=(existentialism)OR TS=("spiritual healing") OR TS=("spiritual therap\*")OR TS=("transcultural care") OR TS=("life style")
4. 2 OR 3
5. 1 AND 4

PEDro 13/12/2016 Title/abstract: bladder cancer

The **cited and citing** articles of the included studies, retrieved with the above searches, will be screened through **Web of Science** to potentially identify other studies.
