# Supplementary material for: Rehabilitation interventions to improve patient-reported outcomes and physical fitness in survivors of muscle invasive bladder cancer: a systematic review protocol
Source: PubMed Central journal article supplement — BMJ Open. 2017 Jun 6;7(5):e016054. doi: 10.1136/bmjopen-2017-016054 (PMC5726122; doi:10.1136/bmjopen-2017-016054), 2017-06-06
Supplement: bmjopen-2017-016054supp001.pdf [file bmjopen-2017-016054supp001.pdf]

## Search Strategy

| Database                                                     | Data last searched | Search Syntax                                                                                                                                                                                                                                                                                                                                                                                                                                                                                                                                                                                                                                                                                                                                                                                                                                                                                                                                                                                                                                                                                                                                                                                                                                                                                                                                                                                                                                                                                                                                                                                                                                                                                                                                                                                                                                                                                                                                                                                                                                                                                                                                                                                                                                                                                                                                                                                                                                                                                                                                                                                                                                                                                                                                                                                                                                                                                                                                                                                                                                                                                                                                                                                                                                                                                                                                                                                                                                                                                                                                                    |
|--------------------------------------------------------------|--------------------|------------------------------------------------------------------------------------------------------------------------------------------------------------------------------------------------------------------------------------------------------------------------------------------------------------------------------------------------------------------------------------------------------------------------------------------------------------------------------------------------------------------------------------------------------------------------------------------------------------------------------------------------------------------------------------------------------------------------------------------------------------------------------------------------------------------------------------------------------------------------------------------------------------------------------------------------------------------------------------------------------------------------------------------------------------------------------------------------------------------------------------------------------------------------------------------------------------------------------------------------------------------------------------------------------------------------------------------------------------------------------------------------------------------------------------------------------------------------------------------------------------------------------------------------------------------------------------------------------------------------------------------------------------------------------------------------------------------------------------------------------------------------------------------------------------------------------------------------------------------------------------------------------------------------------------------------------------------------------------------------------------------------------------------------------------------------------------------------------------------------------------------------------------------------------------------------------------------------------------------------------------------------------------------------------------------------------------------------------------------------------------------------------------------------------------------------------------------------------------------------------------------------------------------------------------------------------------------------------------------------------------------------------------------------------------------------------------------------------------------------------------------------------------------------------------------------------------------------------------------------------------------------------------------------------------------------------------------------------------------------------------------------------------------------------------------------------------------------------------------------------------------------------------------------------------------------------------------------------------------------------------------------------------------------------------------------------------------------------------------------------------------------------------------------------------------------------------------------------------------------------------------------------------------------------------------|
| The Cochrane Central Register of Controlled Trials (CENTRAL) | 13/12/2016         | <ol style="list-style-type: none"> <li>1. [mh "Urinary Bladder Neoplasms"] OR [mh "Carcinoma, Transitional Cell"] OR ("bladder cancer"):ti,ab,kw OR ("bladder carcinoma"):ti,ab,kw OR ("bladder malignancy"):ti,ab,kw OR ("bladder neoplasm"):ti,ab,kw OR ("bladder tumor"):ti,ab,kw OR ("transitional cell carcinoma"):ti,ab,kw OR ("transitional cell cancer"):ti,ab,kw OR ("transitional cell malignancies"):ti,ab,kw OR ("transitional cell tumor"):ti,ab,kw OR ("urothelial cancer"):ti,ab,kw OR ("urothelial carcinoma"):ti,ab,kw OR ("urothelial malignancy"):ti,ab,kw OR ("urothelial tumor"):ti,ab,kw OR ("urinary tract carcinoma"):ti,ab,kw OR ("urinary tract cancer"):ti,ab,kw OR ("urinary tract malignancy"):ti,ab,kw OR ("urinary tract tumor"):ti,ab,kw</li> <li>2. [mh "exercise"] OR [mh "Exercise Movement Techniques"] OR [mh "Sports"] OR [mh "Physical Fitness"] OR [mh "Physical Exertion"] OR [mh "Exercise Therapy"] OR [mh "Dance Therapy"] OR [mh "Recreation Therapy"] OR [mh "Rehabilitation, Vocational"] OR [mh "Telerehabilitation"] OR [mh "Occupational Therapy"] OR [mh "Self Care"] OR [mh "Urinary Incontinence/rehabilitation"] OR [mh "Pelvic Floor/therapy"] OR ("self care"):ti,ab,kw OR (exercise):ti,ab,kw OR (sport):ti,ab,kw OR ("physical activity"):ti,ab,kw OR (physiotherapy):ti,ab,kw OR (kinesiotherapy):ti,ab,kw OR ("physical conditioning"):ti,ab,kw OR ("physical education"):ti,ab,kw OR ("physical fitness"):ti,ab,kw OR (running):ti,ab,kw OR (swimming):ti,ab,kw OR (walking):ti,ab,kw OR (jogging):ti,ab,kw OR ("weight lifting"):ti,ab,kw OR (dance):ti,ab,kw OR ("tai chi"):ti,ab,kw OR (yoga):ti,ab,kw OR (pilates):ti,ab,kw OR (gymnastic):ti,ab,kw OR ("resistance training"):ti,ab,kw OR ("aerobic training"):ti,ab,kw OR ("anaerobic training"):ti,ab,kw OR ("muscle training"):ti,ab,kw OR (stretching):ti,ab,kw OR (aerobic):ti,ab,kw OR (rehabilitation):ti,ab,kw OR ("pre-rehabilitation"):ti,ab,kw OR (prehabilitation):ti,ab,kw OR (aquagym):ti,ab,kw OR (football):ti,ab,kw OR (soccer):ti,ab,kw OR ("circuit training"):ti,ab,kw OR (fitness):ti,ab,kw OR ("bladder training"):ti,ab,kw OR ("incontinence management"):ti,ab,kw OR ("urinary management"):ti,ab,kw</li> <li>3. [mh "Tertiary Prevention"] OR [mh "Social Support"] OR [mh "Psychiatric Rehabilitation"] OR [mh "Health Promotion"] OR [mh "Psychotherapy"] OR [mh "Counseling"] OR [mh "Patient Education as Topic"] OR [mh "Sex Education"] OR [mh "Sexuality/rehabilitation"] OR [mh "Health Literacy"] OR [mh "psychology/education"] OR [mh "psychology/therapy"] OR [mh "Problem Solving"] OR [mh "Mind-body therapies"] OR [mh "patient participation"] OR [mh "Existentialism"] OR [mh "spiritual therapies"] OR [mh "problem-based learning"] OR [mh "Sedentary Lifestyle"] OR ("psychosocial intervention"):ti,ab,kw OR ("psychologic intervention"):ti,ab,kw OR ("psychological intervention"):ti,ab,kw OR ("psychology intervention"):ti,ab,kw OR ("social intervention"):ti,ab,kw OR ("psychosocial therapy"):ti,ab,kw OR ("psychologic therapy"):ti,ab,kw OR ("psychological therapy"):ti,ab,kw OR ("psychology therapies"):ti,ab,kw OR (psychotherapy):ti,ab,kw OR ("tertiary health care"):ti,ab,kw OR ("tertiary prevention"):ti,ab,kw OR ("social support"):ti,ab,kw OR ("social behavior"):ti,ab,kw OR ("support care"):ti,ab,kw OR ("supportive care"):ti,ab,kw OR ("behavior treatment"):ti,ab,kw OR ("behavior therapy"):ti,ab,kw OR ("cognitive treatment"):ti,ab,kw OR ("cognitive</li> </ol> |

therapy"):ti,ab,kw OR (counseling):ti,ab,kw OR ("patient education"):ti,ab,kw OR ("patient participation"):ti,ab,kw OR ("health education"):ti,ab,kw OR ("sex education"):ti,ab,kw OR ("sexual education"):ti,ab,kw OR (psychoeducation):ti,ab,kw OR ("sex therapy"):ti,ab,kw OR ("sexual therapy"):ti,ab,kw OR ("stoma education"):ti,ab,kw OR ("stoma therapy"):ti,ab,kw OR ("health literacy"):ti,ab,kw OR ("health promotion"):ti,ab,kw OR ("health behavior"):ti,ab,kw OR ("cognitive behavior"):ti,ab,kw OR ("behavior training"):ti,ab,kw OR ("behavioral training"):ti,ab,kw OR (CBT) OR ("complementary therapy"):ti,ab,kw OR ("mind body therapy"):ti,ab,kw OR ("spiritual therapy"):ti,ab,kw OR ("relaxation therapy"):ti,ab,kw OR ("relaxation training"):ti,ab,kw OR ("client centered therapy"):ti,ab,kw OR (conditioning):ti,ab,kw OR ("stoma management"):ti,ab,kw OR ("bowel management"):ti,ab,kw OR (coping):ti,ab,kw OR (mindfulness):ti,ab,kw OR (empowerment):ti,ab,kw OR ("self-monitoring"):ti,ab,kw OR ("motivation therapy"):ti,ab,kw OR ("motivational therapy"):ti,ab,kw OR ("motivation interviewing"):ti,ab,kw OR ("motivational interviewing"):ti,ab,kw OR ("motivation treatment"):ti,ab,kw OR ("motivational treatment"):ti,ab,kw OR (psychology):ti,ab,kw OR ("problem solving"):ti,ab,kw OR ("psychosocial care"):ti,ab,kw OR ("psychological care"):ti,ab,kw OR ("psychologic care"):ti,ab,kw OR ("caregiver support"):ti,ab,kw OR (sociotherapy):ti,ab,kw OR ("occupational therapy"):ti,ab,kw OR ("care delivery"):ti,ab,kw OR ("functional therapy"):ti,ab,kw OR ("functional training"):ti,ab,kw OR (existentialism):ti,ab,kw OR ("spiritual healing"):ti,ab,kw OR ("spiritual therapy"):ti,ab,kw OR ("transcultural care"):ti,ab,kw OR ("life style"):ti,ab,kw

4. 2 OR 3

5. 1 AND 4

MEDLINE (via PubMed interface) 13/12/2016

1. "Urinary Bladder Neoplasms"[MESH] OR "Urinary Bladder/abnormalities"[MESH] OR "Urinary bladder/surgery"[MESH] OR "Carcinoma, Transitional Cell"[Mesh] OR "bladder cancer"[TIAB] OR "bladder cancers"[TIAB] OR "bladder carcinoma"[TIAB] OR "bladder carcinomas"[TIAB] OR "bladder malignancy"[TIAB] OR "bladder malignancies"[TIAB] OR "bladder neoplasm"[TIAB] OR "bladder neoplasms"[TIAB] OR "bladder tumor"[TIAB] OR "bladder tumors"[TIAB] OR "bladder tumour"[TIAB] OR "bladder tumours"[TIAB] OR "transitional cell carcinoma"[TIAB] OR "transitional cell carcinomas"[TIAB] OR "transitional cell cancer"[TIAB] OR "transitional cell cancers"[TIAB] OR "transitional cell malignancies"[TIAB] OR "transitional cell tumor"[TIAB] OR "transitional cell tumors"[TIAB] OR "transitional cell tumour"[TIAB] OR "transitional cell tumours"[TIAB] OR "urothelial cancer"[TIAB] OR "urothelial cancers"[TIAB] OR "urothelial carcinoma"[TIAB] OR "urothelial carcinomas"[TIAB] OR "urothelial malignancy"[TIAB] OR "urothelial malignancies"[TIAB] OR "urothelial tumor"[TIAB] OR "urothelial tumors"[TIAB] OR "urothelial tumour"[TIAB] OR "urothelial tumours"[TIAB] OR "urinary tract carcinoma"[TIAB] OR "urinary tract carcinomas"[TIAB] OR "urinary tract cancer"[TIAB] OR "urinary tract cancers"[TIAB] OR "urinary tract malignancy"[TIAB] OR "urinary tract malignancies"[TIAB] OR "urinary tract tumor"[TIAB] OR "urinary tract tumors"[TIAB] OR "urinary tract tumour"[TIAB] OR "urinary tract tumours"[TIAB]
2. "exercise"[MESH] OR "Exercise Movement Techniques"[Mesh] OR "Sports"[Mesh] OR "Physical Fitness"[Mesh] OR "Physical Exertion"[Mesh] OR "Exercise Therapy"[Mesh] OR "Dance Therapy"[Mesh] OR "Recreation Therapy"[Mesh] OR "Rehabilitation, Vocational"[Mesh] OR "Telerehabilitation"[Mesh] OR "Occupational Therapy"[Mesh] OR "Self Care"[Mesh] OR "Urinary Incontinence/rehabilitation"[Mesh] OR "Pelvic Floor/therapy"[Mesh] OR "self care"[TIAB] OR

- “exercise”[TIAB] OR “exercising”[TIAB] OR “exercises”[TIAB] OR “sport”[TIAB] OR “sports”[TIAB] OR “physical activity”[TIAB] OR “physical activities”[TIAB] OR “physiotherapy”[TIAB] OR “kinesiotherapy”[TIAB] OR “physical conditioning”[TIAB] OR physical education\*[TIAB] OR “physical fitness”[TIAB] OR “running”[TIAB] OR “swimming”[TIAB] OR “walking”[TIAB] OR “jogging”[TIAB] OR “weight lifting”[TIAB] OR “dancing”[TIAB] OR “dance”[TIAB] OR “tai chi”[TIAB] OR “tai ji”[TIAB] OR “yoga”[TIAB] OR “pilates”[TIAB] OR “gymnastic”[TIAB] OR “gymnastics”[TIAB] OR “resistance training”[TIAB] OR “aerobic training”[TIAB] OR “anaerobic training”[TIAB] OR “muscle training”[TIAB] OR “stretching”[TIAB] OR “aerobic”[TIAB] OR “aerobics”[TIAB] OR “rehabilitation”[TIAB] OR “pre-habilitation”[TIAB] OR “prehabilitation”[TIAB] OR “aquagym”[TIAB] OR “football”[TIAB] OR “soccer”[TIAB] OR “circuit training”[TIAB] OR “fitness”[TIAB] OR “bladder training”[TIAB] OR “incontinence management”[TIAB] OR “urinary management”[TIAB]
3. "Tertiary Prevention"[Mesh] OR "Social Support"[Mesh] OR "Psychiatric Rehabilitation"[Mesh] OR "Health Promotion"[Mesh] OR "Psychotherapy"[Mesh] OR "Counseling"[Mesh] OR "Patient Education as Topic"[Mesh] OR "Sex Education"[Mesh] OR "Sexuality/rehabilitation"[Mesh] OR "Health Literacy"[Mesh] OR "psychology/education"[MESH] OR "psychology/therapy"[MESH] OR "Problem Solving"[MESH] OR "Mind-body therapies"[Mesh] OR "patient participation"[MESH] OR "Existentialism"[MESH] OR "spiritual therapies"[MESH] OR "problem-based learning"[MESH] OR "Sedentary Lifestyle"[Mesh] OR psychosocial intervention\*[TIAB] OR psychologic intervention\*[TIAB] OR psychological intervention\*[TIAB] OR psychology intervention\*[TIAB] OR social intervention\*[TIAB] OR psychosocial therap\*[TIAB] OR psychologic therap\*[TIAB] OR "psychological therapy"[TIAB] OR "psychological therapies"[TIAB] OR "psychology therapies"[TIAB] OR "psychotherapy"[TIAB] OR "tertiary health care"[TIAB] OR "tertiary prevention"[TIAB] OR "social support"[TIAB] OR social behav\*[TIAB] OR "support care"[TIAB] OR "supportive care"[TIAB] OR behavior treatment\*[TIAB] OR behavioral treatment\*[TIAB] OR behavior therap\*[TIAB] OR behavioral therap\*[TIAB] OR cognitive treatment\*[TIAB] OR cognitive therap\*[TIAB] OR "counseling"[TIAB] OR patient education\*[TIAB] OR "patient participation"[TIAB] OR health education\*[TIAB] OR sex education\*[TIAB] OR sexual education\*[TIAB] OR psychoeducation\*[TIAB] OR sex therap\*[TIAB] OR sexual therap\*[TIAB] OR stoma education\*[TIAB] OR stoma therap\*[TIAB] OR health literac\*[TIAB] OR health promotion\*[TIAB] OR health behavio\*[TIAB] OR "cognitive behavior"[TIAB] OR "behavior training"[TIAB] OR "behavioral training"[TIAB] OR "behavioural training"[TIAB] OR CBT[TIAB] OR complementary therap\*[TIAB] OR mind body therap\*[TIAB] OR spiritual therap\*[TIAB] OR relaxation therap\*[TIAB] OR "relaxation training"[TIAB] OR client centered therap\*[TIAB] OR conditioning[TIAB] OR stoma management[TIAB] OR bowel management[TIAB] OR coping [TIAB] OR mindfulness[TIAB] OR empowerment[TIAB] OR empowering[TIAB] OR self-monitoring\*[TIAB] OR motivation therap\*[TIAB] OR motivational therap\*[TIAB] OR motivation interview[TIAB] OR motivation interviewing[TIAB] OR motivational interview[TIAB] OR motivational interviewing[TIAB] OR motivation treatment\*[TIAB] OR motivational treatment\*[TIAB] OR psychology[TIAB] OR problem solv\*[TIAB] OR "psychosocial care"[TIAB] OR "psychological care"[TIAB] OR "psychologic care"[TIAB] OR caregiver support\*[TIAB] OR sociotherap\*[TIAB] OR occupational therap\*[TIAB] OR care deliver\*[TIAB] OR functional therap\*[TIAB] OR "functional training"[TIAB] OR existentialism[TIAB] OR "spiritual healing"[TIAB] OR spiritual therap\*[TIAB] OR "transcultural care"[TIAB] OR "life style"[TIAB]
4. 2 OR 3

|                                   |            |                                                                                                                                                                                                                                                                                                                                                                                                                                                                                                                                                                                                                                                                                                                                                                                                                                                                                                                                                                                                                                                                                                                                                                                                                                                                                                                                                                                                                                                                                                                                                                                                                                                                                                                                                                                                                                                                                                                                                                                                                                                                                                                                                                                                                                                                                                                                                                                                                                                                                                                                                                                                                                                                                                                                                                                                                                                                                                                                                                                                                                                                                                                                                                                                                                                                                                                                                                                                                                                                                                                                                                                                                                                                                                                                                                                                                                                                                                                                                                                                                                                                                                                                                                                                                                                                                                                                                                                                                                                                                                                                        |
|-----------------------------------|------------|----------------------------------------------------------------------------------------------------------------------------------------------------------------------------------------------------------------------------------------------------------------------------------------------------------------------------------------------------------------------------------------------------------------------------------------------------------------------------------------------------------------------------------------------------------------------------------------------------------------------------------------------------------------------------------------------------------------------------------------------------------------------------------------------------------------------------------------------------------------------------------------------------------------------------------------------------------------------------------------------------------------------------------------------------------------------------------------------------------------------------------------------------------------------------------------------------------------------------------------------------------------------------------------------------------------------------------------------------------------------------------------------------------------------------------------------------------------------------------------------------------------------------------------------------------------------------------------------------------------------------------------------------------------------------------------------------------------------------------------------------------------------------------------------------------------------------------------------------------------------------------------------------------------------------------------------------------------------------------------------------------------------------------------------------------------------------------------------------------------------------------------------------------------------------------------------------------------------------------------------------------------------------------------------------------------------------------------------------------------------------------------------------------------------------------------------------------------------------------------------------------------------------------------------------------------------------------------------------------------------------------------------------------------------------------------------------------------------------------------------------------------------------------------------------------------------------------------------------------------------------------------------------------------------------------------------------------------------------------------------------------------------------------------------------------------------------------------------------------------------------------------------------------------------------------------------------------------------------------------------------------------------------------------------------------------------------------------------------------------------------------------------------------------------------------------------------------------------------------------------------------------------------------------------------------------------------------------------------------------------------------------------------------------------------------------------------------------------------------------------------------------------------------------------------------------------------------------------------------------------------------------------------------------------------------------------------------------------------------------------------------------------------------------------------------------------------------------------------------------------------------------------------------------------------------------------------------------------------------------------------------------------------------------------------------------------------------------------------------------------------------------------------------------------------------------------------------------------------------------------------------------------------------------|
| EMBASE (via Embase.com interface) | 13/12/2016 | 5. 1 AND 4                                                                                                                                                                                                                                                                                                                                                                                                                                                                                                                                                                                                                                                                                                                                                                                                                                                                                                                                                                                                                                                                                                                                                                                                                                                                                                                                                                                                                                                                                                                                                                                                                                                                                                                                                                                                                                                                                                                                                                                                                                                                                                                                                                                                                                                                                                                                                                                                                                                                                                                                                                                                                                                                                                                                                                                                                                                                                                                                                                                                                                                                                                                                                                                                                                                                                                                                                                                                                                                                                                                                                                                                                                                                                                                                                                                                                                                                                                                                                                                                                                                                                                                                                                                                                                                                                                                                                                                                                                                                                                                             |
|                                   |            | <ol style="list-style-type: none"> <li data-bbox="741 229 2112 619">1. 'bladder tumor'/exp OR 'urinary tract carcinoma'/exp OR 'bladder surgery'/exp OR 'transitional cell carcinoma'/exp OR 'bladder cancer':ab,ti OR 'bladder cancers':ab,ti OR 'bladder carcinoma':ab,ti OR 'bladder carcinomas':ab,ti OR 'bladder malignancy':ab,ti OR 'bladder malignancies':ab,ti OR 'bladder neoplasm':ab,ti OR 'bladder neoplasms':ab,ti OR 'bladder tumor':ab,ti OR 'bladder tumors':ab,ti OR 'bladder tumour':ab,ti OR 'bladder tumours':ab,ti OR 'transitional cell carcinoma':ab,ti OR 'transitional cell carcinomas':ab,ti OR 'transitional cell cancer':ab,ti OR 'transitional cell cancers':ab,ti OR 'transitional cell malignancies':ab,ti OR 'transitional cell tumor':ab,ti OR 'transitional cell tumors':ab,ti OR 'transitional cell tumour':ab,ti OR 'transitional cell tumours':ab,ti OR 'urothelial cancer':ab,ti OR 'urothelial cancers':ab,ti OR 'urothelial carcinoma':ab,ti OR 'urothelial carcinomas':ab,ti OR 'urothelial malignancy':ab,ti OR 'urothelial malignancies':ab,ti OR 'urothelial tumor':ab,ti OR 'urothelial tumors':ab,ti OR 'urothelial tumour':ab,ti OR 'urothelial tumours':ab,ti OR 'urinary tract carcinoma':ti,ab OR 'urinary tract carcinomas':ti,ab OR 'urinary tract cancer':ti,ab OR 'urinary tract cancers':ti,ab OR 'urinary tract malignance':ti,ab OR 'urinary tract malignancy':ti,ab OR 'urinary tract malignancies':ti,ab OR 'urinary tract tumor':ti,ab OR 'urinary tract tumors':ti,ab OR 'urinary tract tumour':ti,ab OR 'urinary tract tumours':ti,ab</li> <li data-bbox="741 624 2112 1013">2. 'physical activity'/exp OR 'exercise'/exp OR 'physiotherapy'/exp OR 'kinesiotherapy'/exp OR 'fitness'/exp OR 'sport'/exp OR 'bladder training'/exp OR 'cancer rehabilitation'/exp OR 'cognitive rehabilitation'/exp OR 'functional training'/exp OR 'geriatric rehabilitation'/exp OR 'muscle training'/exp OR 'home rehabilitation'/exp OR 'occupational therapy'/exp OR 'pelvic floor muscle training'/exp OR 'self care':ab,ti OR 'exercise':ab,ti OR 'exercising':ab,ti OR 'exercises':ab,ti OR 'sport':ab,ti OR 'sports':ab,ti OR 'physical activity':ab,ti OR 'physical activities':ab,ti OR 'physiotherapy':ab,ti OR 'kinesiotherapy':ab,ti OR 'physical conditioning':ab,ti OR 'physical education*':ab,ti OR 'physical fitness':ab,ti OR 'running':ab,ti OR 'swimming':ab,ti OR 'walking':ab,ti OR 'jogging':ab,ti OR 'weight lifting':ab,ti OR 'dancing':ab,ti OR 'dance':ab,ti OR 'tai chi':ab,ti OR 'tai ji':ab,ti OR 'yoga':ab,ti OR 'pilates':ab,ti OR 'gymnastic':ab,ti OR 'gymnastics':ab,ti OR 'resistance training':ab,ti OR 'aerobic training':ab,ti OR 'anaerobic training':ab,ti OR 'muscle training':ab,ti OR 'stretching':ab,ti OR 'aerobic':ab,ti OR 'aerobics':ab,ti OR 'rehabilitation':ab,ti OR 'pre-habilitation':ab,ti OR 'prehabilitation':ab,ti OR 'aquagym':ab,ti OR 'football':ab,ti OR 'soccer':ab,ti OR 'circuit training':ab,ti OR 'fitness':ab,ti OR 'bladder training':ab,ti OR 'incontinence management':ab,ti OR 'urinary management':ab,ti</li> <li data-bbox="741 1018 2112 1370">3. 'psychosocial rehabilitation'/exp OR 'recreational therapy'/exp OR 'sociotherapy'/exp OR 'telerehabilitation'/exp OR 'vocational rehabilitation'/exp OR 'caregiver support'/exp OR 'psychosocial care'/exp OR 'social support'/exp OR 'spiritual care'/exp OR 'psychotherapy'/exp OR 'preoperative education'/exp OR 'psychoeducation'/exp OR 'patient education'/exp OR 'health promotion'/exp OR 'reinforcement'/exp OR 'patient participation'/exp OR 'counseling'/exp OR 'problem solving'/exp OR 'home physiotherapy'/exp OR 'cancer prevention'/exp OR 'learning'/exp OR 'rehabilitation care'/exp OR 'bladder and bowel management'/exp OR 'empowerment'/exp OR 'coping behavior'/exp OR 'social interaction'/exp OR 'social participation'/exp OR 'behavior change'/exp OR 'lifestyle'/exp OR 'psychosocial intervention*':ab,ti OR 'psychologic intervention*':ab,ti OR 'psychological intervention*':ab,ti OR 'psychology intervention*':ab,ti OR 'social intervention*':ab,ti OR 'psychosocial therap*':ab,ti OR 'psychologic therap*':ab,ti OR 'psychological therapy':ab,ti OR 'psychological therapies':ab,ti OR 'psychology therapies':ab,ti OR 'psychotherapy':ab,ti OR 'tertiary health care':ab,ti OR 'tertiary prevention':ab,ti OR 'social support':ab,ti OR 'social behav*':ab,ti OR 'support care':ab,ti OR 'supportive</li> </ol> |

care':ab,ti OR 'behavior treatment\*':ab,ti OR 'behavioral treatment\*':ab,ti OR 'behavior therap\*':ab,ti OR 'behavioral therap\*':ab,ti OR 'cognitive treatment\*':ab,ti OR 'cognitive therap\*':ab,ti OR 'counseling':ab,ti OR 'patient education\*':ab,ti OR 'patient participation':ab,ti OR 'health education\*':ab,ti OR 'sex education\*':ab,ti OR 'sexual education\*':ab,ti OR 'psychoeducation\*':ab,ti OR 'sex therap\*':ab,ti OR 'sexual therap\*':ab,ti OR 'stoma education\*':ab,ti OR 'stoma therap\*':ab,ti OR 'health literac\*':ab,ti OR 'health promotion\*':ab,ti OR 'health behavio\*':ab,ti OR 'cognitive behavior':ab,ti OR 'behavior training':ab,ti OR 'behavioral training':ab,ti OR 'behavioural training':ab,ti OR 'CBT':ab,ti OR 'complementary therap\*':ab,ti OR 'mind body therap\*':ab,ti OR 'spiritual therap\*':ab,ti OR 'relaxation therap\*':ab,ti OR 'relaxation training':ab,ti OR 'client centered therap\*':ab,ti OR 'conditioning':ab,ti OR 'stoma management':ab,ti OR 'bowel management':ab,ti OR 'coping':ab,ti OR 'mindfulness':ab,ti OR 'empowerment':ab,ti OR 'empowering':ab,ti OR 'self-monitoring\*':ab,ti OR 'motivation therap\*':ab,ti OR 'motivational therap\*':ab,ti OR 'motivation interview':ab,ti OR 'motivation interviewing':ab,ti OR 'motivational interview':ab,ti OR 'motivational interviewing':ab,ti OR 'motivation treatment\*':ab,ti OR 'motivational treatment\*':ab,ti OR 'psychology':ab,ti OR 'problem solv\*':ab,ti OR 'psychosocial care':ab,ti OR 'psychological care':ab,ti OR 'psychologic care':ab,ti OR 'caregiver support\*':ab,ti OR 'sociotherap\*':ab,ti OR 'occupational therap\*':ab,ti OR 'care deliver\*':ab,ti OR 'functional therap\*':ab,ti OR 'functional training':ab,ti OR 'existentialism':ab,ti OR 'spiritual healing':ab,ti OR 'spiritual therap\*':ab,ti OR 'transcultural care':ab,ti OR 'life style':ab,ti

4. 2 OR 3

5. 1 AND 4

Web of Science

13/12/2016

1. TS=("bladder cancer") OR TS=("bladder cancers") OR TS=("bladder carcinoma") OR TS=("bladder carcinomas") OR TS=("bladder malignancy") OR TS=("bladder malignancies") OR TS=("bladder neoplasm") OR TS=("bladder neoplasms") OR TS=("bladder tumor") OR TS=("bladder tumors")OR TS=("bladder tumour") OR TS=("bladder tumours") OR TS=("transitional cell carcinoma") OR TS=("transitional cell carcinomas") OR TS=("transitional cell cancer") OR TS=("transitional cell cancers") OR TS=("transitional cell malignancies") OR TS=("transitional cell tumor") OR TS=("transitional cell tumors") OR TS=("transitional cell tumour") OR TS=("transitional cell tumours") OR TS=("urothelial cancer") OR TS=("urothelial cancers") OR TS=("urothelial carcinoma") OR TS=("urothelial carcinomas")OR TS=("urothelial malignancy") OR TS=("urothelial malignancies") OR TS=("urothelial tumor") OR TS=("urothelial tumors")OR TS=("urothelial tumour") OR TS=("urothelial tumours") OR TS=("urinary tract carcinoma") OR TS=("urinary tract carcinomas") OR TS=("urinary tract cancer") OR TS=("urinary tract cancers") OR TS=("urinary tract malignancy") OR TS=("urinary tract malignancies") OR TS=("urinary tract tumor") OR TS=("urinary tract tumors") OR TS=("urinary tract tumour") OR TS=("urinary tract tumours")
2. TS=("self care") OR TS=(exercise) OR TS=(exercising) OR TS=(exercises) OR TS=(sport) OR TS=(sports) OR TS=("physical activity") OR TS=("physical activities") OR TS=(physiotherapy) OR TS=(kinesiotherapy) OR TS=("physical conditioning") OR TS=("physical education\*") OR TS=("physical fitness") OR TS=(running) OR TS=(swimming) OR TS=(walking) OR TS=(jogging) OR TS=("weight lifting") OR TS=(dancing) OR TS=(dance) OR TS=("tai chi") OR TS=("tai ji") OR TS=(yoga) OR TS=(pilates) OR TS=(gymnastic) OR TS=(gymnastics) OR TS=("resistance training") OR TS=("aerobic training") OR TS=("anaerobic training") OR TS=("muscle training") OR TS=(stretching) OR TS=(aerobic) OR TS=(aerobics) OR TS=(rehabilitation) OR TS=("pre-habilitation") OR TS=(prehabilitation) OR TS=(aquagym) OR TS=(football) OR TS=(soccer)

OR TS=("circuit training") OR TS=(fitness) OR TS=("bladder training") OR TS=("incontinence management") OR TS=("urinary management")

3. TS=("psychosocial intervention\*")OR TS=("psychologic intervention\*") OR TS=("psychological intervention\*")OR TS=("psychology intervention\*")OR TS=("social intervention\*") OR TS=("psychosocial therap\*")OR TS=("psychologic therap\*")OR TS=("psychological therapy")OR TS=("psychological therapies") OR TS=("psychology therapies") OR TS=(psychotherapy) OR TS=("tertiary health care") OR TS=("tertiary prevention") OR TS=("social support") OR TS=("social behav\*") OR TS=("support care") OR TS=("supportive care") OR TS=("behavior treatment\*") OR TS=("behavioral treatment\*")OR TS=("behavior therap\*")OR TS=("behavioral therap\*") OR TS=("cognitive treatment\*") OR TS=("cognitive therap\*") OR TS=(counseling) OR TS=("patient education\*")OR TS=("patient participation")OR TS=("health education\*")OR TS=("sex education\*") OR TS=("sexual education\*")OR TS=(psychoeducation\*)OR TS=("sex therap\*")OR TS=("sexual therap\*") OR TS=("stoma education\*")OR TS=("stoma therap\*")OR TS=("health literac\*") OR TS=("health promotion\*")OR TS=("health behavio\*") OR TS=("cognitive behavior") OR TS=("behavior training") OR TS=("behavioral training") OR TS=("behavioural training") OR TS=(CBT) OR TS=("complementary therap\*")OR TS=("mind body therap\*")OR TS=("spiritual therap\*")OR TS=("relaxation therap\*")OR TS=("relaxation training") OR TS=("client centered therap\*")OR TS=(conditioning)OR TS=("stoma management")OR TS=("bowel management") OR TS=(coping) OR TS=(mindfulness)OR TS=(empowerment) OR TS=(empowering) OR TS=("self-monitoring\*")OR TS=("motivation therap\*")OR TS=("motivational therap\*")OR TS=("motivation interview") OR TS=("motivation interviewing") OR TS=("motivational interview") OR TS=("motivational interviewing") OR TS=("motivation treatment\*")OR TS=("motivational treatment\*")OR TS=(psychology)OR TS=("problem solv\*")OR TS=("psychosocial care")OR TS=("psychological care")OR TS=("psychologic care")OR TS=("caregiver support\*")OR TS=(sociotherap\*) OR TS=("occupational therap\*") OR TS=("care deliver\*")OR TS=("functional therap\*")OR TS=("functional training") OR TS=(existentialism)OR TS=("spiritual healing") OR TS=("spiritual therap\*")OR TS=("transcultural care") OR TS=("life style")

4. 2 OR 3

5. 1 AND 4

PEDro

13/12/2016

Title/abstract: bladder cancer

The **cited and citing** articles of the included studies, retrieved with the above searches, will be screened through **Web of Science** to potentially identify other studies.
